# Supplementary material for: Curtachalasins, immunosuppressive agents from the endophytic fungus Xylaria cf. curta
Source: Royal Society of Chemistry journal article supplement (doi:10.1039/c9ob01552c), 2019-01-01
Supplement: c9ob01552c1.pdf [file c9ob01552c1.pdf]

## Supplementary information

### **Curtachalans, immunosuppressive agents from endophytic fungus**

#### ***Xylaria cf. curta***

Wen-Xuan Wang,<sup>a</sup> Gui-Guang Cheng,<sup>b</sup> Zheng-Hui Li,<sup>a</sup> Hong-Lian Ai,<sup>a</sup> Juan He,<sup>a</sup> Jing Li,<sup>\*a</sup> Tao Feng,<sup>\*a</sup> and Ji-Kai Liu<sup>\*a</sup>

<sup>a</sup>School of Pharmaceutical Sciences, South-Central University for Nationalities, Wuhan, Hubei 430074, PR China

<sup>b</sup>Yunnan Institute of Food Safety, Kunming University of Science and Technology, Kunming 650500, PR China.

## Content

**Table S1.**  $^1\text{H}$  NMR data of **1–11** ( $\text{CDCl}_3$ , 600 MHz,  $J$  in Hz).

**Fig. S1.**  $^1\text{H}$  NMR of **1** ( $\text{CDCl}_3$ , 600 MHz).

**Fig. S2.**  $^{13}\text{C}$  NMR of **1** ( $\text{CDCl}_3$ , 150 MHz).

**Fig. S3.** DEPT of **1**.

**Fig. S4.** HSQC of **1**.

**Fig. S5.** HMBC of **1**.

**Fig. S6.**  $^1\text{H}$ - $^1\text{H}$  COSY of **1**.

**Fig. S7.** ROESY of **1**.

**Fig. S8.** Experimental ECD of **1**.

**Fig. S9.** IR spectrum of **1**.

**Fig. S10.** HRESIMS of **1**.

**Fig. S11.**  $^1\text{H}$  NMR of **2** ( $\text{CDCl}_3$ , 600 MHz).

**Fig. S12.**  $^{13}\text{C}$  NMR of **2** ( $\text{CDCl}_3$ , 150 MHz).

**Fig. S13.** DEPT of **2**.

**Fig. S14.** HSQC of **2**.

**Fig. S15.** HMBC of **2**.

**Fig. S16.**  $^1\text{H}$ - $^1\text{H}$  COSY of **2**.

**Fig. S17.** ROESY of **2**.

**Fig. S18.** Experimental ECD of **2**.

**Fig. S19.** IR of **2**.

**Fig. S20.** HRESIMS of **2**.

**Fig. S21.**  $^1\text{H}$  NMR of **3** ( $\text{CDCl}_3$ , 600 MHz).

**Fig. S22.**  $^{13}\text{C}$  NMR of **3** ( $\text{CDCl}_3$ , 150 MHz).

**Fig. S23.** DEPT of **3**.

**Fig. S24.** HSQC of **3**.

**Fig. S25.** HMBC of **3**.

**Fig. S26.**  $^1\text{H}$ - $^1\text{H}$  COSY of **3**.

**Fig. S27.** ROESY of **3**.

**Fig. S28.** Experimental ECD of **3**.

**Fig. S29.** IR of **3**.

**Fig. S30.** HRESIMS of **3**.

**Fig. S31.**  $^1\text{H}$  NMR of **4** ( $\text{CDCl}_3$ , 600 MHz).

**Fig. S32.**  $^{13}\text{C}$  NMR of **4** ( $\text{CDCl}_3$ , 150 MHz).

**Fig. S33.** DEPT of **4**.

**Fig. S34.** HSQC of **4**.

**Fig. S35.** HMBC of **4**.

**Fig. S36.**  $^1\text{H}$ - $^1\text{H}$  COSY of **4**.

**Fig. S37.** ROESY of **4**.

**Fig. S38.** Experimental ECD of **4**.

**Fig. S39.** IR of **4**.

**Fig. S40.** HRESIMS of **4**.

**Fig. S41.**  $^1\text{H}$  NMR of **5** ( $\text{CDCl}_3$ , 600 MHz).

**Fig. S42.**  $^{13}\text{C}$  NMR of **5** ( $\text{CDCl}_3$ , 150 MHz).

**Fig. S43.** DEPT of **5**.  
**Fig. S44.** HSQC of **5**.  
**Fig. S45.** HMBC of **5**.  
**Fig. S46.**  $^1\text{H}$ - $^1\text{H}$  COSY of **5**.  
**Fig. S47.** ROESY of **5**.  
**Fig. S48.** Experimental ECD of **5**.  
**Fig. S49.** IR of **5**.  
**Fig. S50.** HRESIMS of **5**.  
**Fig. S51.**  $^1\text{H}$  NMR of **6** ( $\text{CDCl}_3$ , 600 MHz).  
**Fig. S52.**  $^{13}\text{C}$  NMR of **6** ( $\text{CDCl}_3$ , 150 MHz).  
**Fig. S53.** DEPT of **6**.  
**Fig. S54.** HSQC of **6**.  
**Fig. S55.** HMBC of **6**.  
**Fig. S56.**  $^1\text{H}$ - $^1\text{H}$  COSY of **6**.  
**Fig. S57.** ROESY of **6**.  
**Fig. S58.** Experimental ECD of **6**.  
**Fig. S59.** IR of **6**.  
**Fig. S60.** HRESIMS of **6**.  
**Fig. S61.**  $^1\text{H}$  NMR of **7**.  
**Fig. S62.**  $^{13}\text{C}$  NMR of **7**.  
**Fig. S63.** DEPT of **7**.  
**Fig. S64.** HSQC of **7**.  
**Fig. S65.** HMBC of **7**.  
**Fig. S66.**  $^1\text{H}$ - $^1\text{H}$  COSY of **7**.  
**Fig. S67.** ROESY of **7**.  
**Fig. S68.** Experimental ECD of **7**.  
**Fig. S69.** IR of **7**.  
**Fig. S70.** HRESIMS of **7**.  
**Fig. S71.**  $^1\text{H}$  NMR of **8** ( $\text{CDCl}_3$ , 600 MHz).  
**Fig. S72.**  $^{13}\text{C}$  NMR of **8** ( $\text{CDCl}_3$ , 150 MHz).  
**Fig. S73.** DEPT of **8**.  
**Fig. S74.** HSQC of **8**.  
**Fig. S75.** HMBC of **8**.  
**Fig. S76.**  $^1\text{H}$ - $^1\text{H}$  COSY of **8**.  
**Fig. S77.** ROESY of **8**.  
**Fig. S78.** Experimental ECD of **8**.  
**Fig. S79.** IR of **8**.  
**Fig. S80.** HRESIMS of **8**.  
**Fig. S81.**  $^1\text{H}$  NMR of **9** ( $\text{CDCl}_3$ , 600 MHz).  
**Fig. S82.**  $^{13}\text{C}$  NMR of **9** ( $\text{CDCl}_3$ , 150 MHz).  
**Fig. S83.** DEPT of **9**.  
**Fig. S84.** HSQC of **9**.  
**Fig. S85.** HMBC of **9**.  
**Fig. S86.**  $^1\text{H}$ - $^1\text{H}$  COSY of **9**.

**Fig. S87.** ROESY of **9**.  
**Fig. S88.** Experimental ECD of **9**.  
**Fig. S89.** IR of **9**.  
**Fig. S90.** HRESIMS of **9**.  
**Fig. S91.**  $^1\text{H}$  NMR of **10** ( $\text{CDCl}_3$ , 600 MHz).  
**Fig. S92.**  $^{13}\text{C}$  NMR of **10** ( $\text{CDCl}_3$ , 150 MHz).  
**Fig. S93.** DEPT of **10**.  
**Fig. S94.** HSQC of **10**.  
**Fig. S95.** HMBC of **10**.  
**Fig. S96.**  $^1\text{H}$ - $^1\text{H}$  COSY of **10**.  
**Fig. S97.** ROESY of **10**.  
**Fig. S98.** Experimental ECD of **10**.  
**Fig. S99.** IR of **10**.  
**Fig. S100.** HRESIMS of **10**.  
**Fig. S101.**  $^1\text{H}$  NMR of **11** ( $\text{CDCl}_3$ , 600 MHz).  
**Fig. S102.**  $^{13}\text{C}$  NMR of **11** ( $\text{CDCl}_3$ , 150 MHz).  
**Fig. S103.** DEPT of **11**.  
**Fig. S104.** HSQC of **11**.  
**Fig. S105.** HMBC of **11**.  
**Fig. S106.**  $^1\text{H}$ - $^1\text{H}$  COSY of **11**.  
**Fig. S107.** ROESY of **11**.  
**Fig. S108.** Experimental ECD of **11**.  
**Fig. S109.** IR of **11**.  
**Fig. S110.** HRESIMS of **11**.

**Table S1.** <sup>1</sup>H NMR data of **1–11** (CDCl<sub>3</sub>, 600 MHz, *J* in Hz).

| No    | 1                                    | 2                                                        | 3                                              | 4                                           | 5                                                     |
|-------|--------------------------------------|----------------------------------------------------------|------------------------------------------------|---------------------------------------------|-------------------------------------------------------|
| 3     | 3.66 (dd, 7.5, 7.5)                  | 3.38 m                                                   | 3.32 (br dd, 8.2, 6.9)                         | 4.97 m                                      | 3.33 overlapped                                       |
| 4     | 2.29 overlapped                      | 2.10 br s                                                | 2.44 br s                                      | 2.28 overlapped                             | 2.34 br s                                             |
| 5     |                                      | 2.50 m                                                   |                                                |                                             |                                                       |
| 7     | 4.00 (d, 10.1)                       | 4.46 br s                                                | 3.92 br s                                      | 4.20 (d, 3.0)                               | 4.24 (d, 9.6)                                         |
| 8     | 2.46 (dd, 10.1, 10.1)                |                                                          |                                                |                                             | 1.88 (dd, 9.6, 9.6)                                   |
| 10    | 2.93 m                               | 2.62 (dd, 13.8, 9.0); 2.91 (dd, 13.8, 3.8)               | 3.00 (dd, 13.2, 8.2); 3.06 (dd, 13.2, 6.9)     | 3.08 (dd, 12.9, 4.7); 2.49 (dd, 12.9, 10.5) | 2.94 (dd, 13.6, 6.7); 2.86 (dd, 13.6, 7.9)            |
| 11    | 1.09 s                               | 1.04 (d, 6.3)                                            | 1.26 s                                         | 0.80 s                                      | 1.20 s                                                |
| 12    | 1.34 s                               | 5.07 br s; 5.48 br s                                     | 1.64 s                                         | 1.47 s                                      | 1.61 s                                                |
| 13    | 4.76 (dd, 10.1, 10.1)                | 5.96 br s                                                | 5.86 br s                                      | 2.09 (dd, 15.4, 3.6); 1.59 (dd, 15.4, 12.6) | 4.70 (dd, 9.6, 9.6)                                   |
| 14    | 1.58 (dddd, 12.3, 10.1, 10.1, 3.4)   | 2.07 overlapped                                          |                                                | 1.81 (dddd, 12.0, 12.0, 12.0, 3.9, 3.9)     | 1.61 overlapped                                       |
| 15    | 1.92 m; 1.29 (ddd, 12.3, 12.3, 12.3) | 1.59 (ddd, 12.9, 4.0, 4.0); 1.35 (ddd, 12.9, 12.9, 12.9) | 2.0 (br dd, 13.4, 4.0); 2.29 br dd, 13.4, 13.4 | 1.30 m; 1.49 overlapped                     | 1.93 (br dd, 11.0, 4.0); 1.27 (ddd, 11.0, 11.0, 11.0) |
| 16    | 1.84 m                               | 1.93 m                                                   | 1.89 m                                         | 1.87 m                                      | 1.85 m                                                |
| 19    | 3.40 (d, 10.1)                       | 3.46 (d, 10.0)                                           | 3.64 (dd, 9.6, 8.6)                            | 3.47 (dd, 10.4, 10.4)                       | 3.41 (dd, 10.5, 8.1)                                  |
| 20    | 2.31 (ddd, 10.1, 10.1, 2.0)          | 2.74 (dd, 10.0, 10.0)                                    | 2.84 (dd, 9.6, 3.8)                            | 2.29 overlapped                             | 2.36 overlapped                                       |
| 21    | 5.35 (d, 2.0)                        | 5.30 br s                                                | 5.69 (d, 3.8)                                  | 5.56 (d, 1.8)                               | 5.50 br s                                             |
| 22    | 2.25 s                               | 2.26 s                                                   | 2.25 s                                         | 2.27 s                                      | 2.24 s                                                |
| 23    | 0.74 (d, 6.7)                        | 0.75 (d, 6.6)                                            | 0.71 (d, 6.6)                                  | 0.74 (d, 6.6)                               | 0.72 (d, 6.5)                                         |
| 25/29 | 7.15 (d, 7.6)                        | 7.13 (d, 7.5)                                            | 7.20 (d, 7.5)                                  | 7.17 (d, 7.4)                               | 7.13 (d, 7.0)                                         |
| 26/28 | 7.30 (dd, 7.6, 7.6)                  | 7.27 (dd, 7.5, 7.5)                                      | 7.29 (dd, 7.5, 7.5)                            | 7.31 (dd, 7.4, 7.4)                         | 7.26 (dd, 7.0, 7.0)                                   |
| 27    | 7.23 (t, 7.6)                        | 7.20 (t, 7.5)                                            | 7.22 overlapped                                | 7.22 (dd, 7.4)                              | 7.18 (t, 7.0)                                         |
| OAc   | 2.30 s                               | 2.11 s                                                   | 2.20 s                                         | 2.19 s                                      | 2.24 s                                                |

**Table S1.** Continued.

| No    | 6                                             | 7                                                        | 8                                    | 9                                          | 10                                                       | 11                                          |
|-------|-----------------------------------------------|----------------------------------------------------------|--------------------------------------|--------------------------------------------|----------------------------------------------------------|---------------------------------------------|
| 3     | 3.40 (dd, 7.2, 7.2)                           | 3.34 m                                                   | 3.49 m                               | 3.55 (dd, 7.3, 7.3)                        | 3.64 overlapped                                          | 3.33 m                                      |
| 4     | 2.31 br s                                     | 2.78 br s                                                | 2.94 br s                            | 3.68 br s                                  | 2.87 br s                                                | 3.00 br s                                   |
| 7     | 4.36 br s                                     | 5.82 br s                                                | 5.97 br s                            |                                            |                                                          | 3.78 overlapped                             |
| 8     | 2.11 overlapped                               | 2.59 overlapped                                          |                                      |                                            |                                                          | 1.74 (ddd, 13.5, 9.8, 4.4)                  |
| 10    | 2.97 (dd, 13.6, 6.7); 2.82 (dd, 13.6, 7.6)    | 2.95 (dd, 13.3, 7.0); 2.82 (dd, 13.3, 8.3)               | 2.92, overlapped; 2.84 overlapped    | 3.04 (dd, 13.3, 6.4); 2.91 (dd, 13.3, 8.4) | 3.16 (dd, 13.2, 5.9); 2.89 (dd, 13.2, 9.3)               | 2.80 m                                      |
| 11    | 1.17 s                                        | 4.82 m; 4.26 m                                           | 4.83 br s; 4.22 br s                 | 1.44 s                                     | 1.43 s                                                   | 1.38 s                                      |
| 12    | 1.72 s                                        | 1.82 s                                                   | 1.75 s                               | 1.68 s                                     | 1.73 s                                                   | 1.62 s                                      |
| 13    | 4.99 (dd, 11.0, 11.0)                         | 4.81 (dd, 11.0, 11.0)                                    | 5.60 s                               | 6.75 s                                     | 6.84 (d, 2.0)                                            | 3.05 (dd, 13.5, 13.5); 2.33 (dd, 13.5, 4.4) |
| 14    | 1.81 (dddd, 11.0, 11.0, 11.0, 3.3)            | 1.80 (dddd, 11.0, 11.0, 11.0, 3.0)                       | 2.06 m                               | 2.38 m                                     | 2.23 overlapped                                          |                                             |
| 15    | 2.10 overlapped; 1.40 (ddd, 11.0, 11.0, 11.0) | 2.09 (ddd, 11.0, 3.0, 3.0); 1.39 (ddd, 11.0, 11.0, 11.0) | 1.47 (ddd, 12.0, 12.0, 12.0); 1.53 m | 1.66 m; 1.44 m                             | 1.68 (ddd, 12.9, 3.7, 3.7); 1.52 (ddd, 12.9, 12.9, 12.9) | 5.20 br s                                   |
| 16    | 1.87 m                                        | 1.87 m                                                   | 1.85 m                               | 1.95 m                                     | 1.95 m                                                   | 3.89 m                                      |
| 19    | 3.43 (dd, 11.0, 8.0)                          | 3.46 (dd, 10.4, 8.0)                                     | 3.40 (dd, 10.7)                      | 3.92 (d, 10.0)                             | 3.48 (dd, 10.5, 6.7)                                     | 5.93 (d, 11.6)                              |
| 20    | 2.69 (ddd, 11.0, 11.0, 2.0)                   | 2.62 overlapped                                          | 2.79 (br dd, 10.7, 10.7)             | 2.40 m                                     | 2.75 (br dd, 12.9, 10.5)                                 | 3.44 (br d, 11.6)                           |
| 21    | 5.46 (d, 2.0)                                 | 5.52 (d, 1.9)                                            | 5.36 br s                            | 4.29 br s                                  | 5.59 br s                                                | 3.82 (br d, 6.9)                            |
| 22    | 2.27 s                                        | 2.26 s                                                   | 2.20 s                               | 2.29 s                                     | 2.28 s                                                   | 1.28 s                                      |
| 23    | 0.79 (d, 6.7)                                 | 0.78 (d, 6.6)                                            | 0.71 (d, 6.6)                        | 0.69 (d, 6.5)                              | 0.76 (d, 6.6)                                            | 1.22 (d, 6.7)                               |
| 25/29 | 7.17 (d, 7.3)                                 | 7.16 (d, 7.2)                                            | 7.10 (d, 7.2)                        | 7.28 (d, 7.2)                              | 7.23 (d, 7.3)                                            | 7.14 (d, 7.5)                               |
| 26/28 | 7.28 (dd, 7.3, 7.3)                           | 7.31 (dd, 7.2)                                           | 7.24 (dd, 7.2)                       | 7.33 (dd, 7.2, 7.2)                        | 7.34 (dd, 7.3, 7.3)                                      | 7.33 (dd, 7.5, 7.5)                         |
| 27    | 7.20 (t, 6.8)                                 | 7.23 (t, 7.2)                                            | 7.16 (t, 7.2)                        | 7.22 (t, 7.2)                              | 7.25 (t, 7.3)                                            | 7.26 (t, 7.5)                               |
| OAc   | 2.22 s                                        | 2.24 s                                                   | 2.10 s                               |                                            | 2.23 s                                                   | 2.26, s                                     |

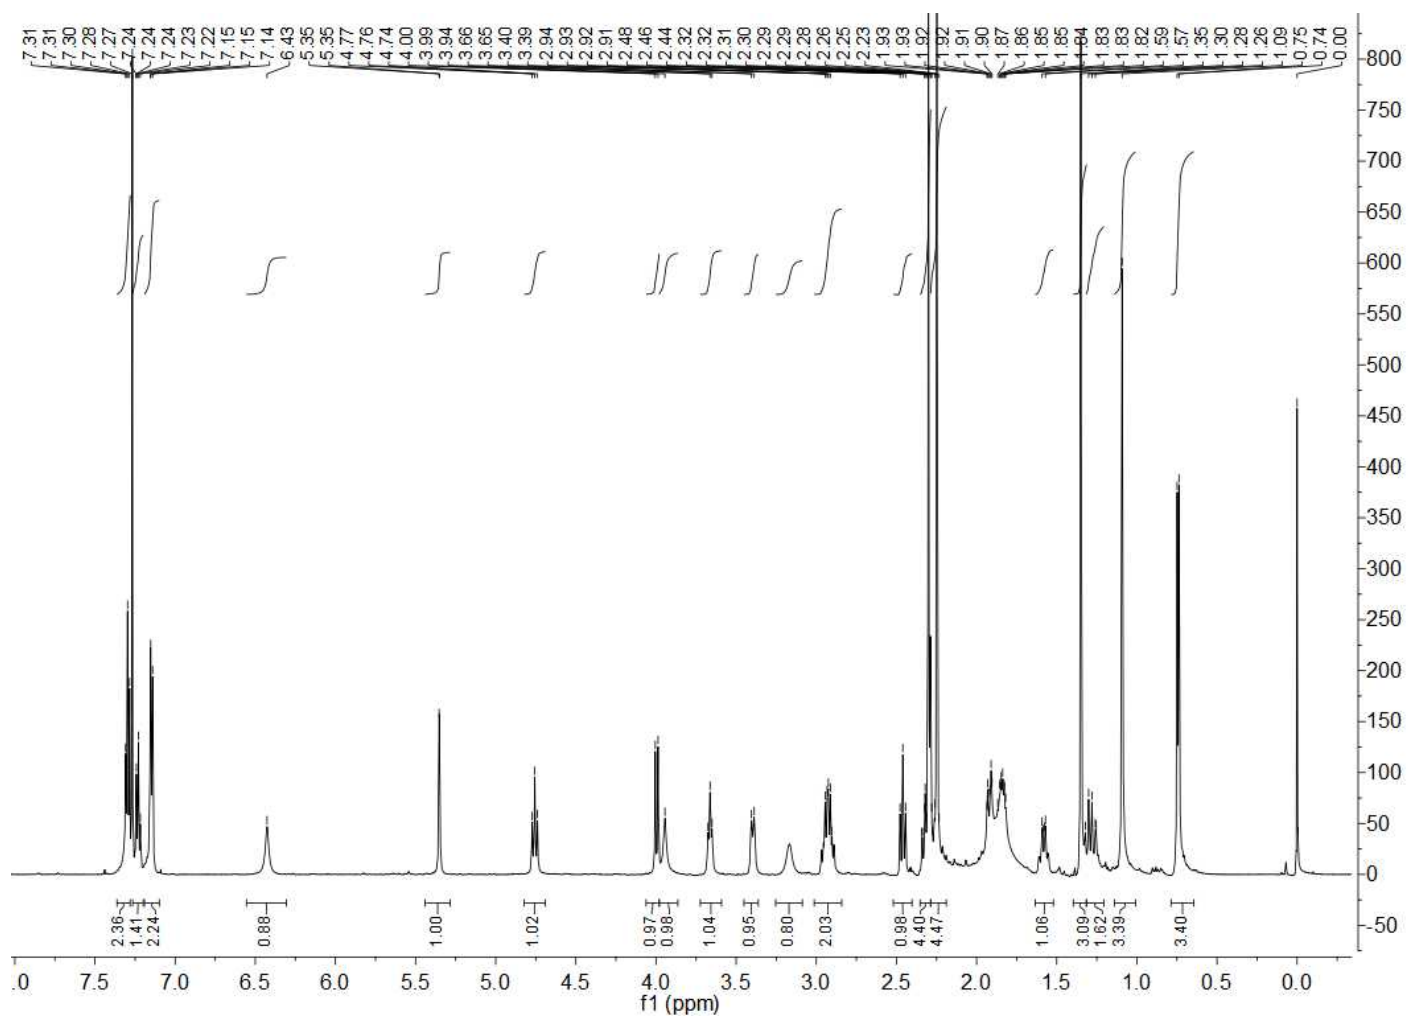

**Fig. S1.**  $^1\text{H}$  NMR of **1** ( $\text{CDCl}_3$ , 600 MHz).

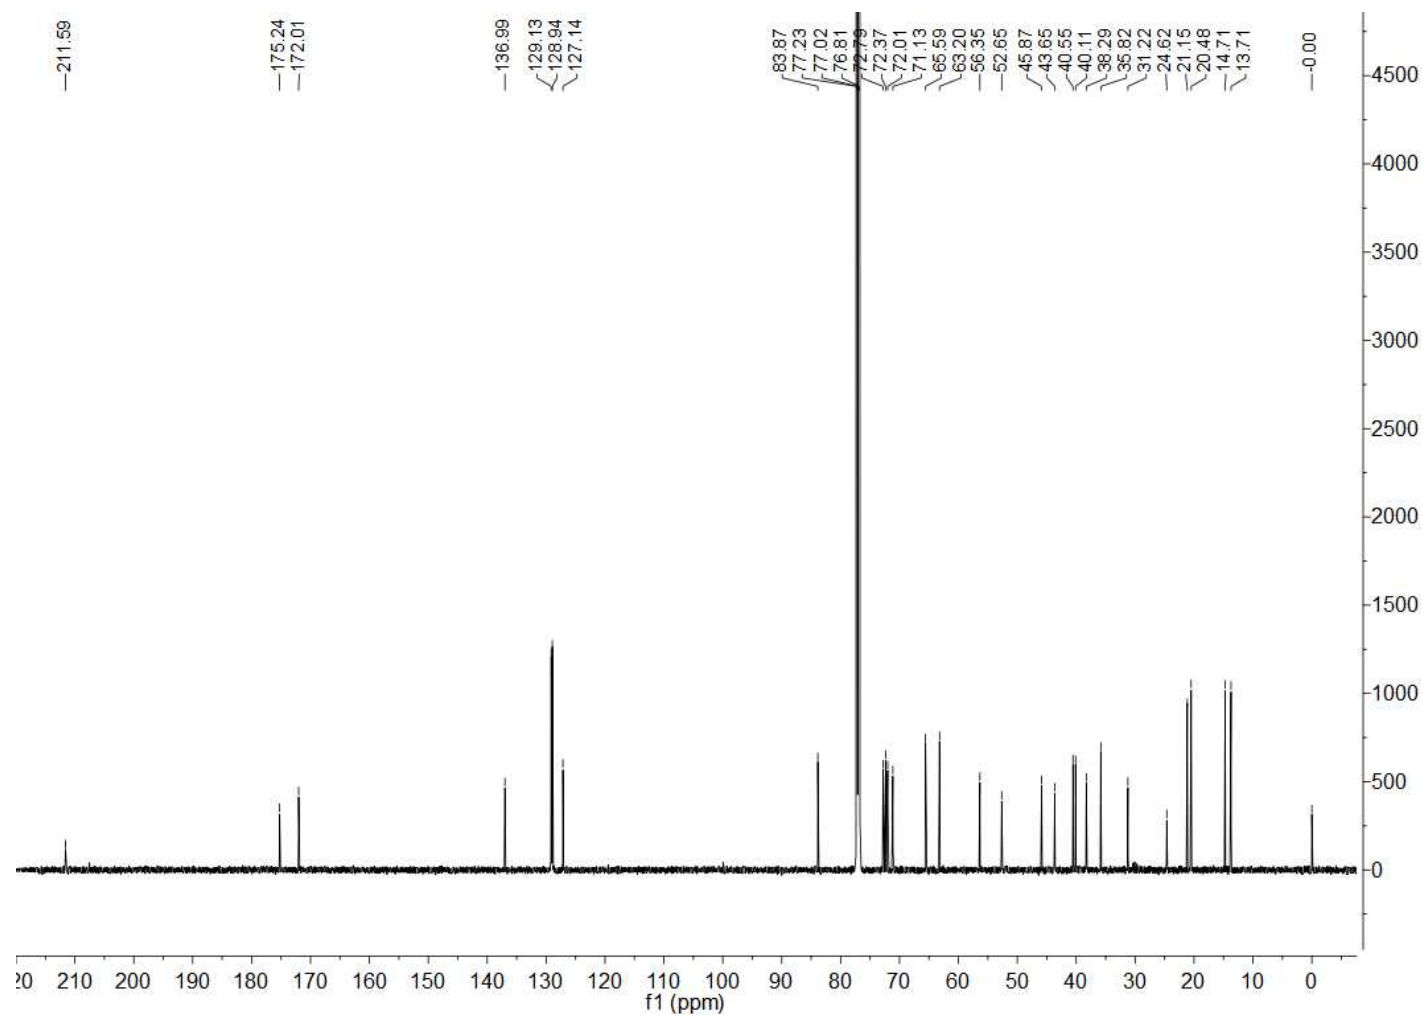

Fig. S2.  $^{13}\text{C}$  NMR of **1** ( $\text{CDCl}_3$ , 150 MHz).



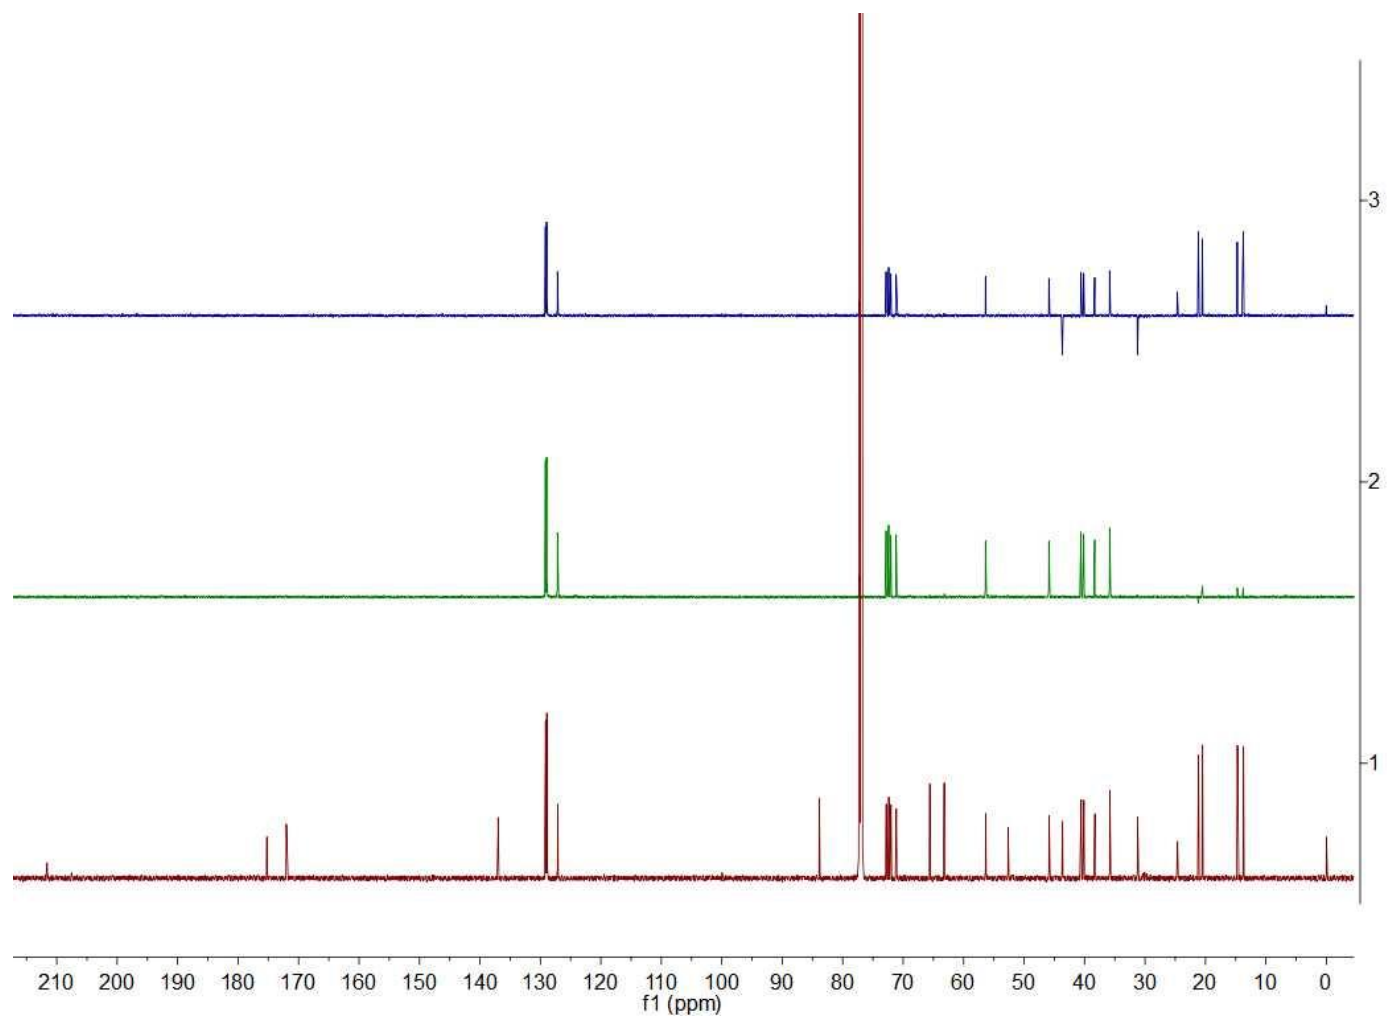

**Fig. S3.** DEPT of 1.

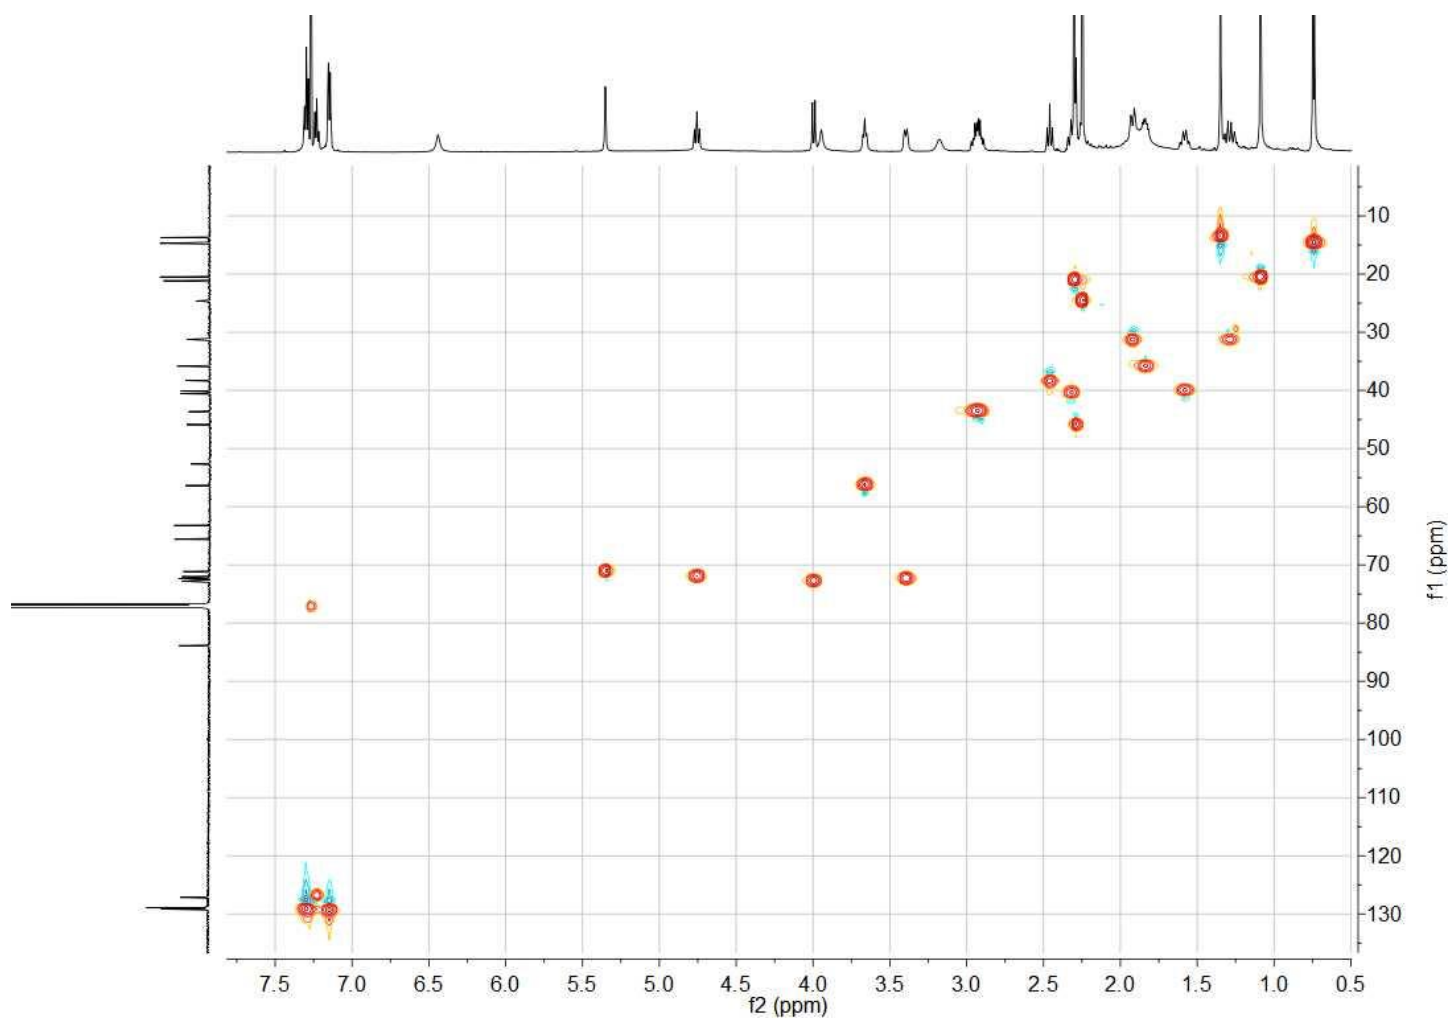

Fig. S4. HSQC of 1.

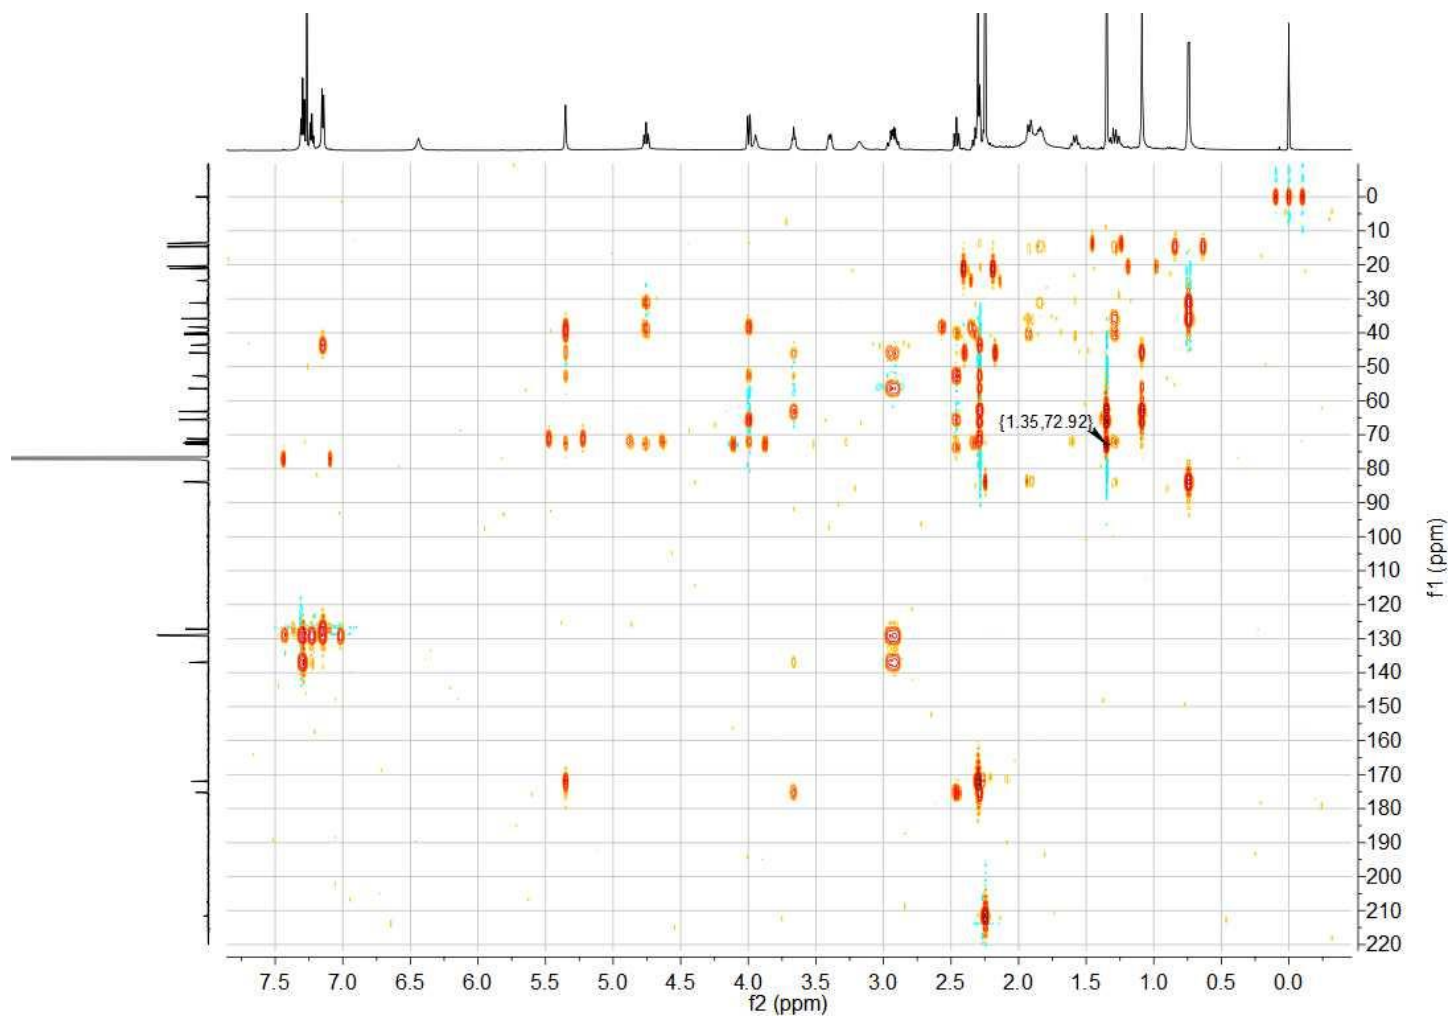

Fig. S5. HMBC of 1.

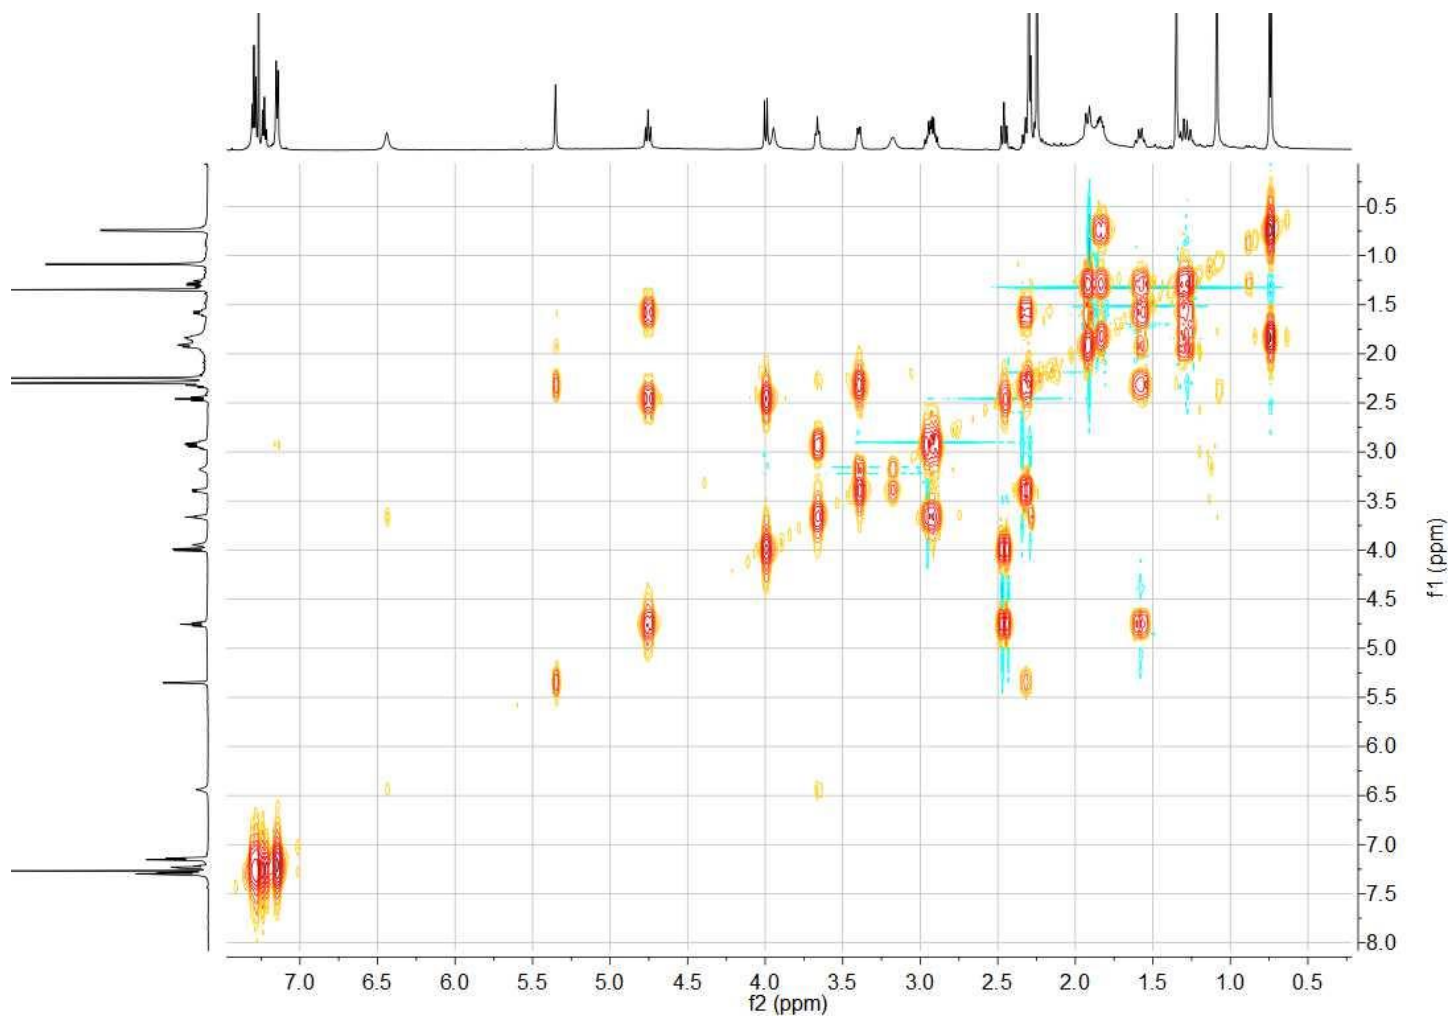

Fig. S6.  $^1\text{H}$ - $^1\text{H}$  COSY of **1**.

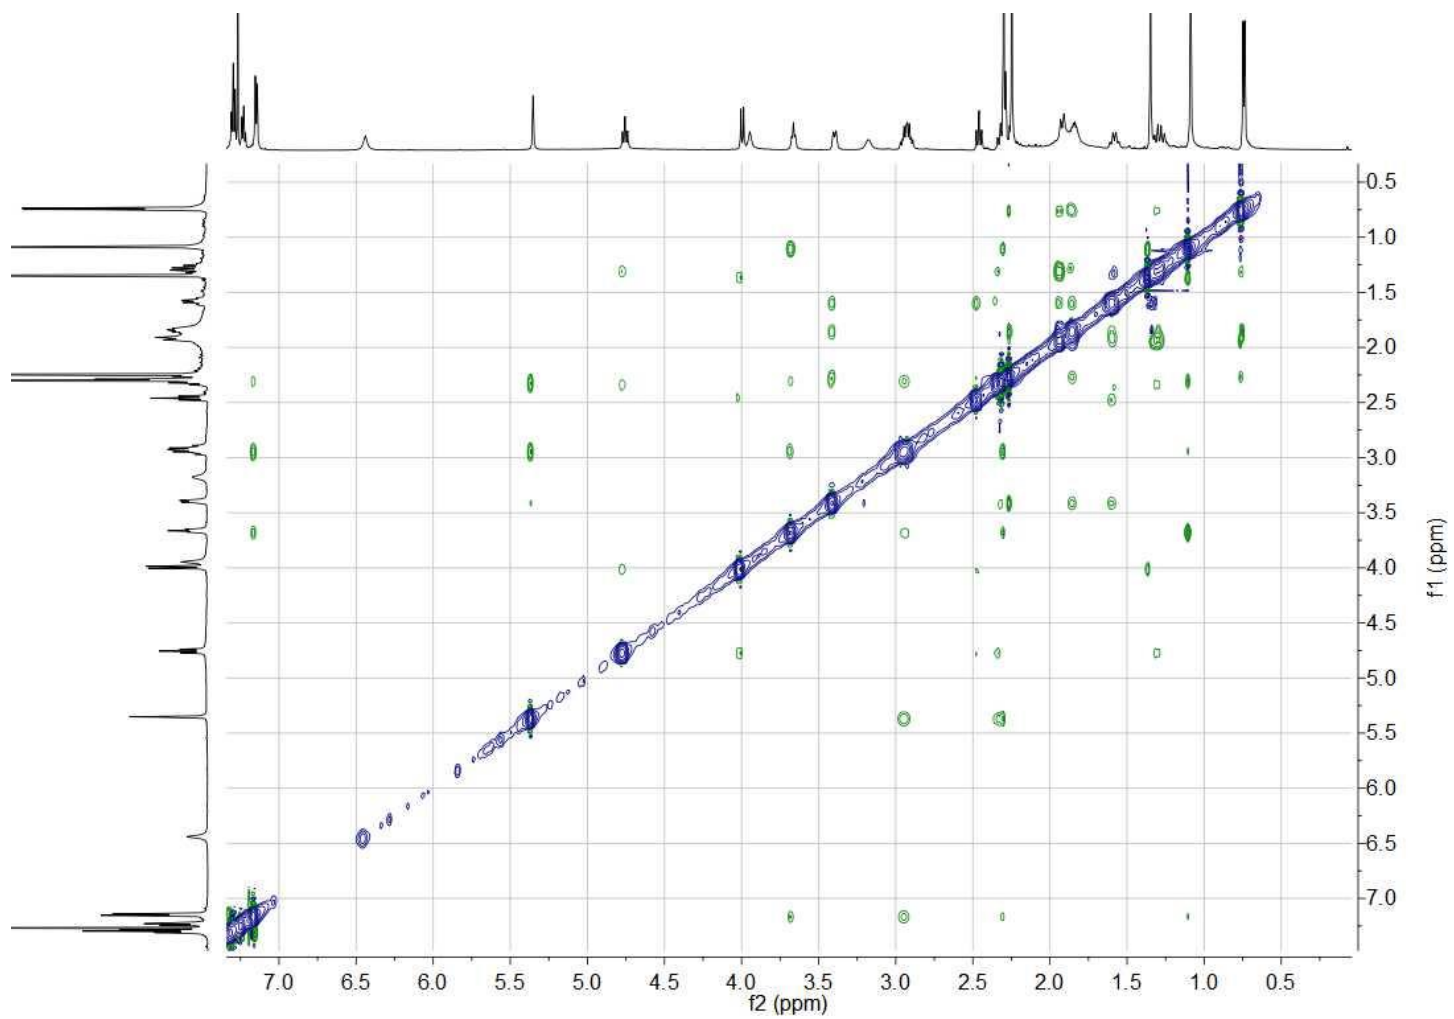

Fig. S7. ROESY of 1.

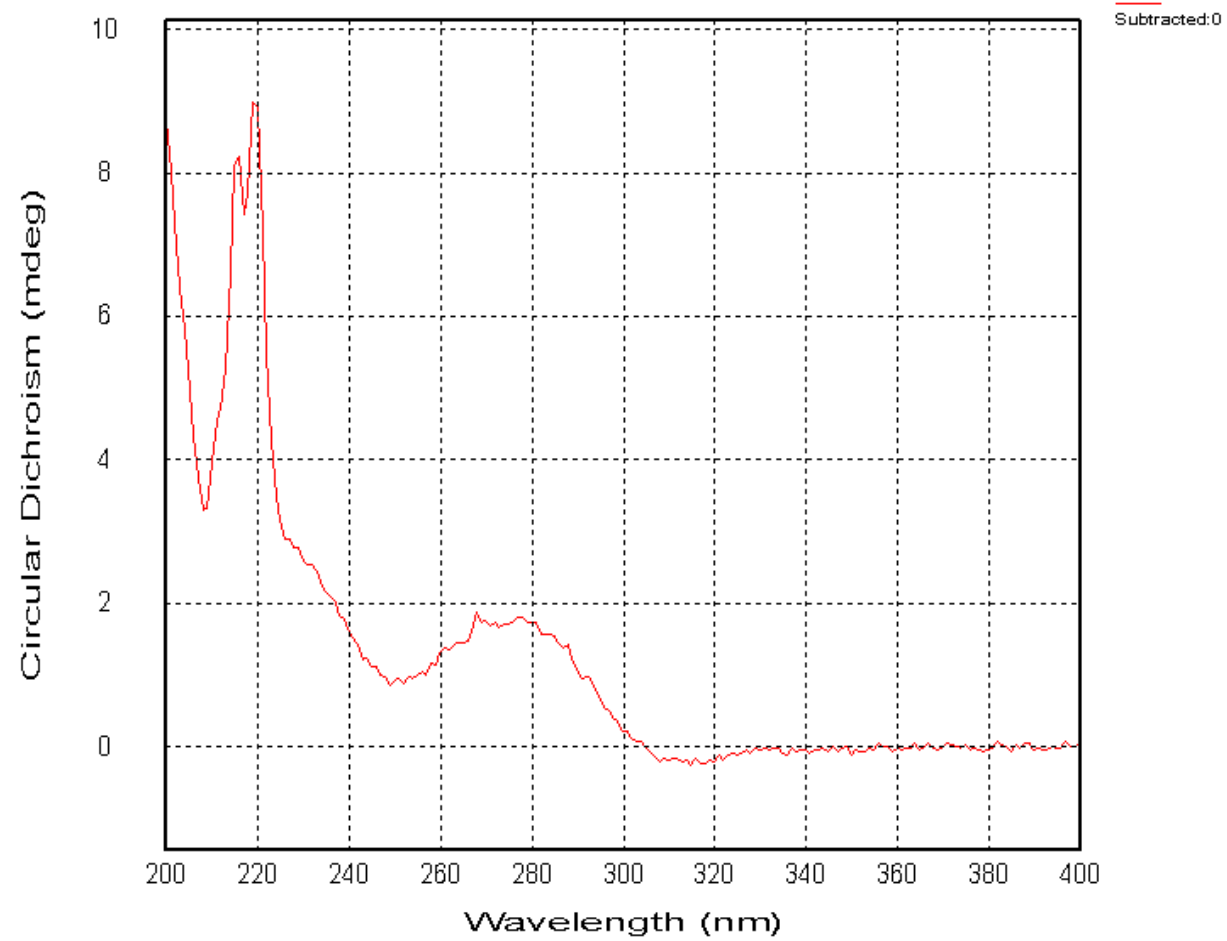

Fig. S8. Experimental ECD of 1.

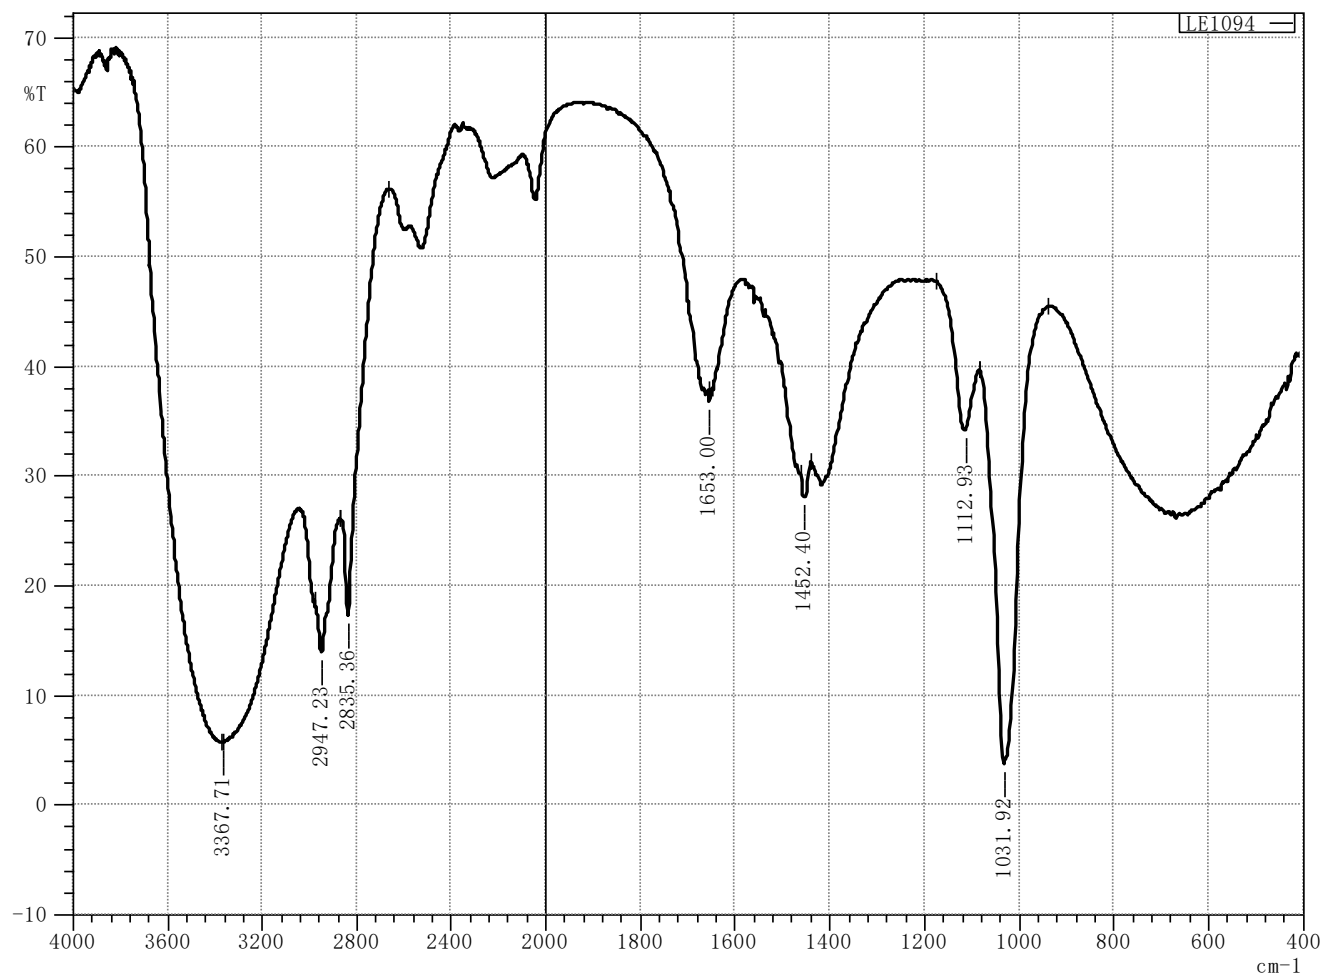

Fig. S9. IR spectrum of 1.

LE1094 #1647 RT: 14.36 AV: 1 NL: 2.61E8  
T: FTMS + p ESI Full lock ms [100.0000-1000.0000]

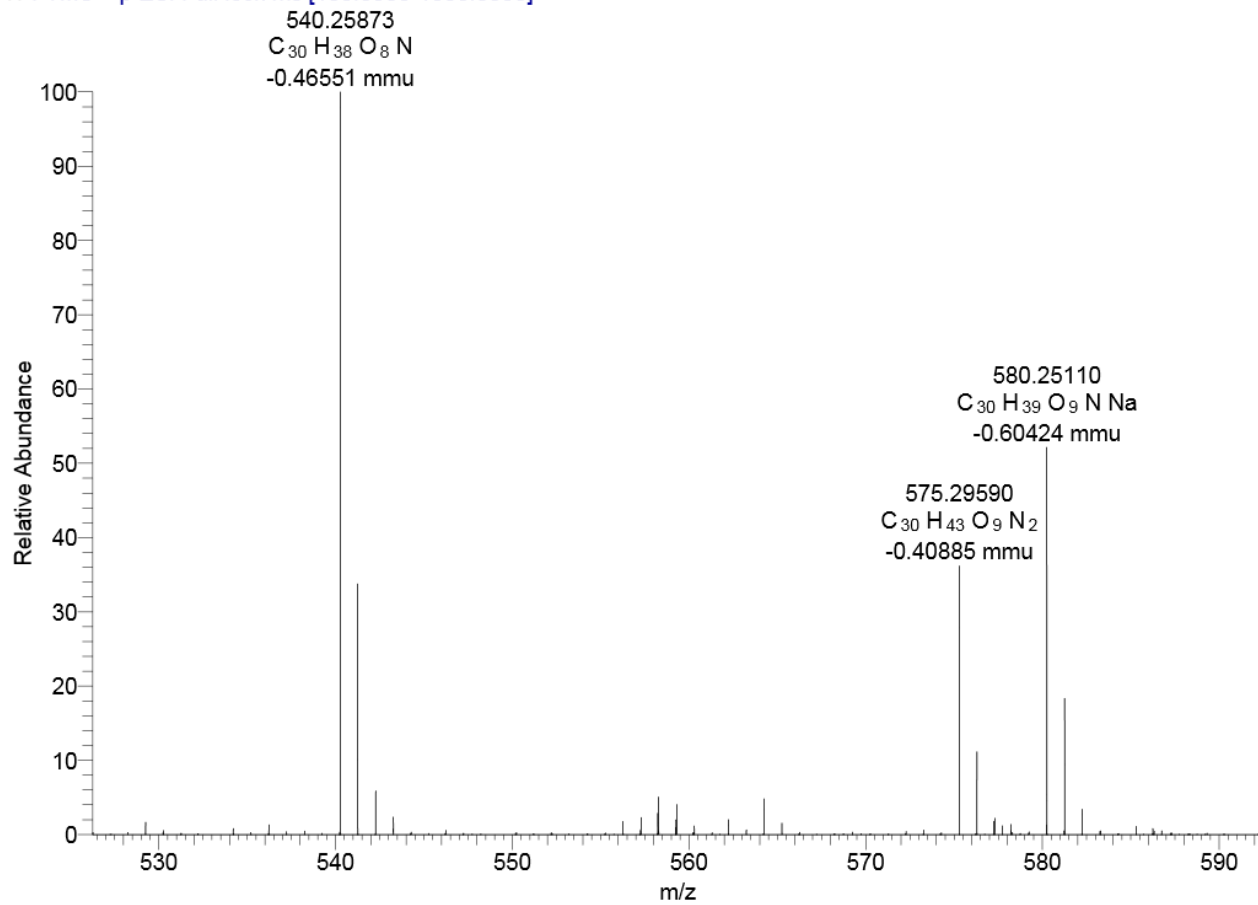

Fig. S10. HRESIMS of 1.



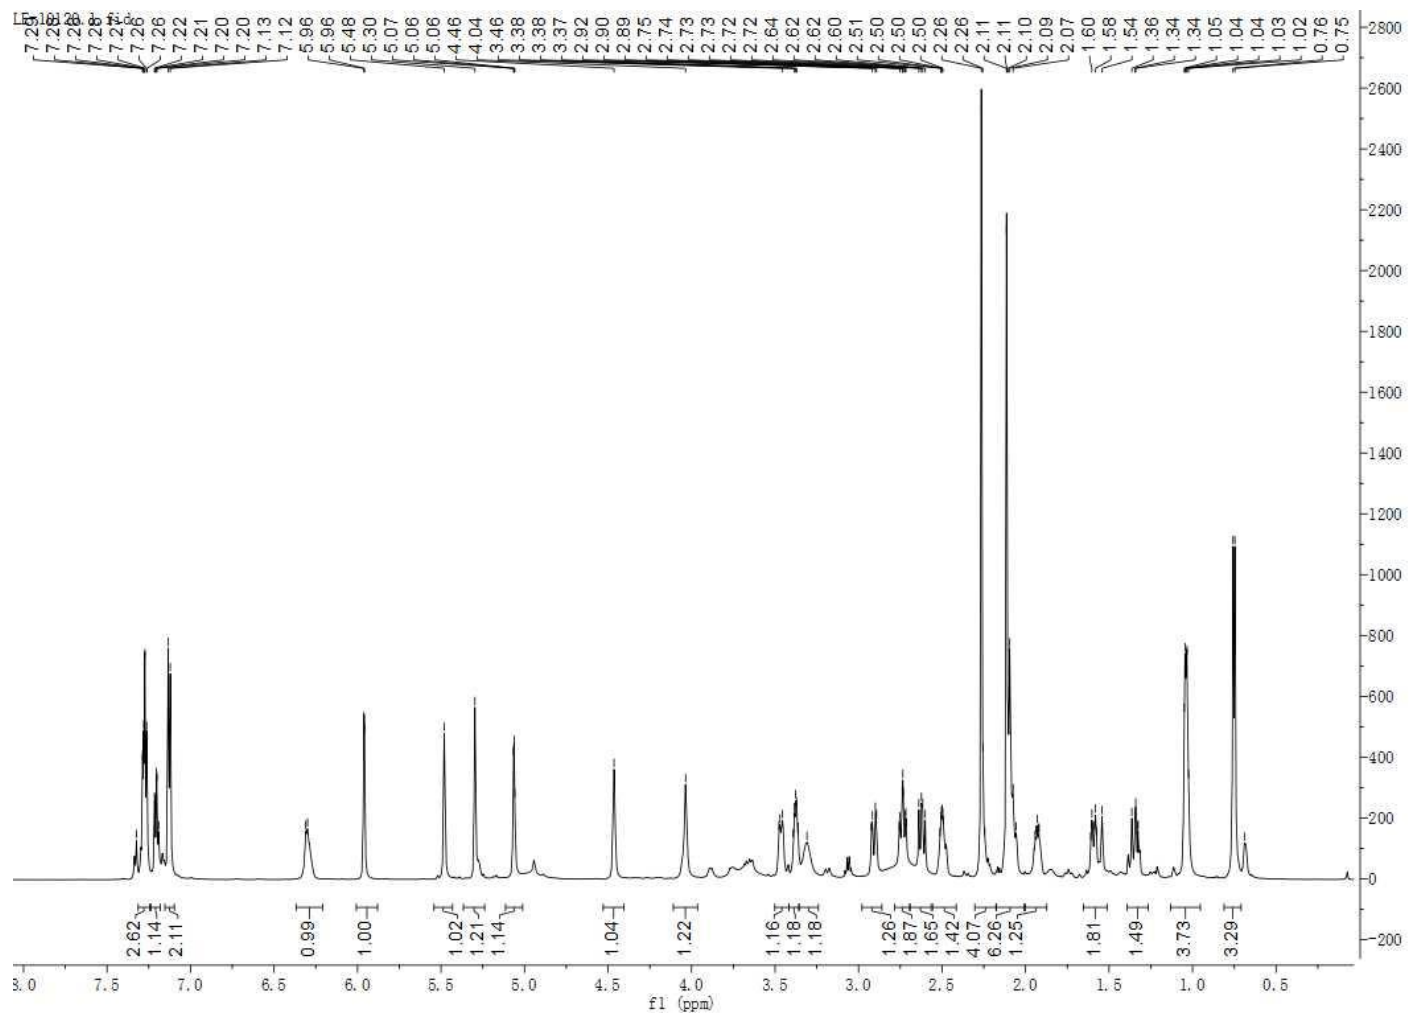

**Fig. S11.**  $^1\text{H}$  NMR of **2** ( $\text{CDCl}_3$ , 600 MHz).

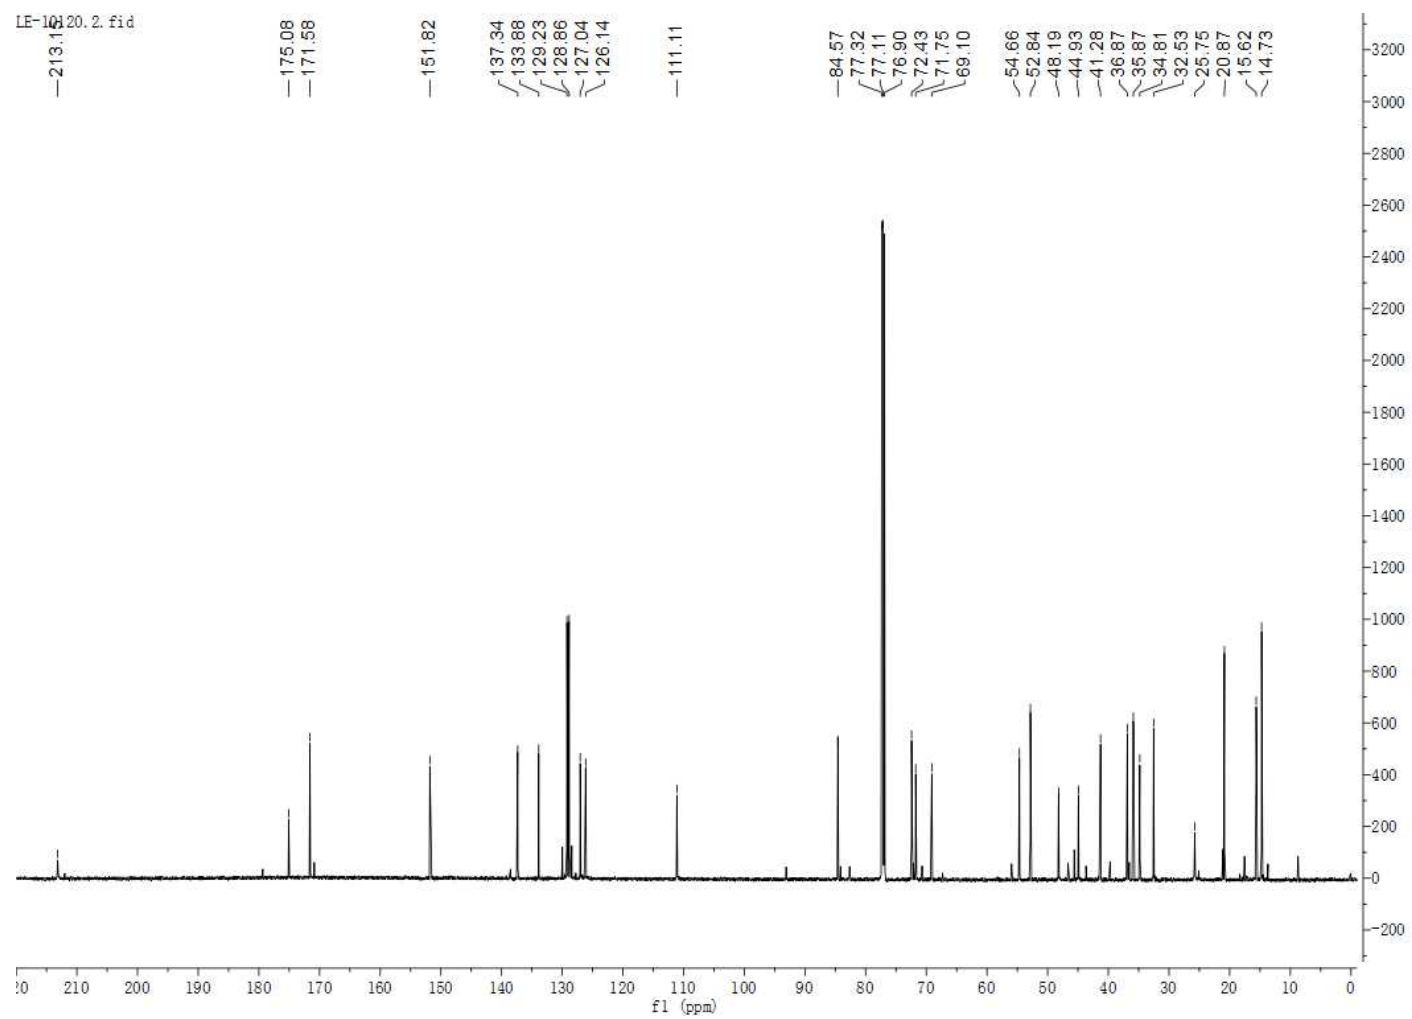

**Fig. S12.**  $^{13}\text{C}$  NMR of **2** ( $\text{CDCl}_3$ , 150 MHz).

LE-10120.4.fid

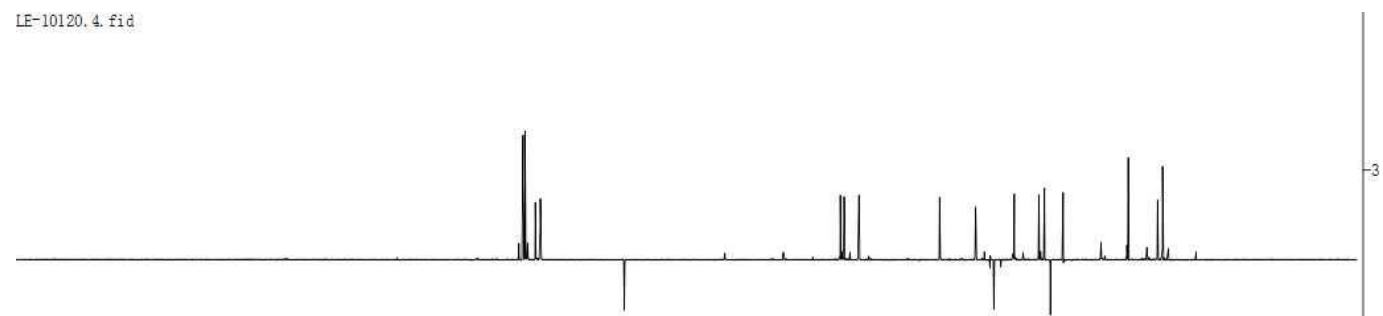

LE-10120.3.fid

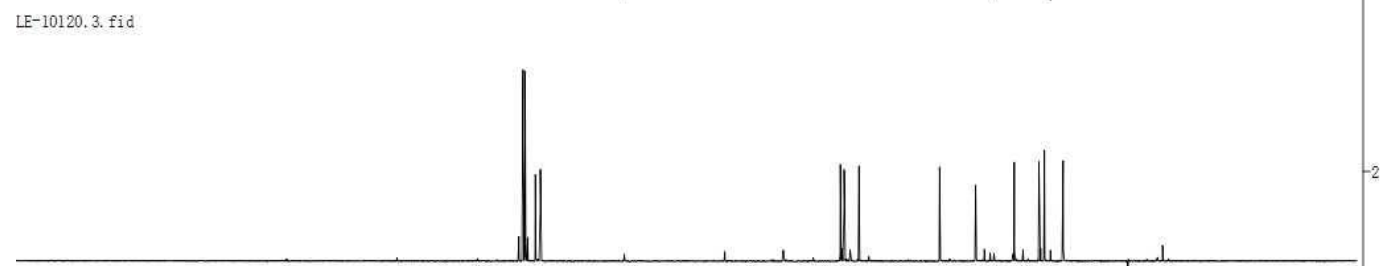

LE-10120.2.fid

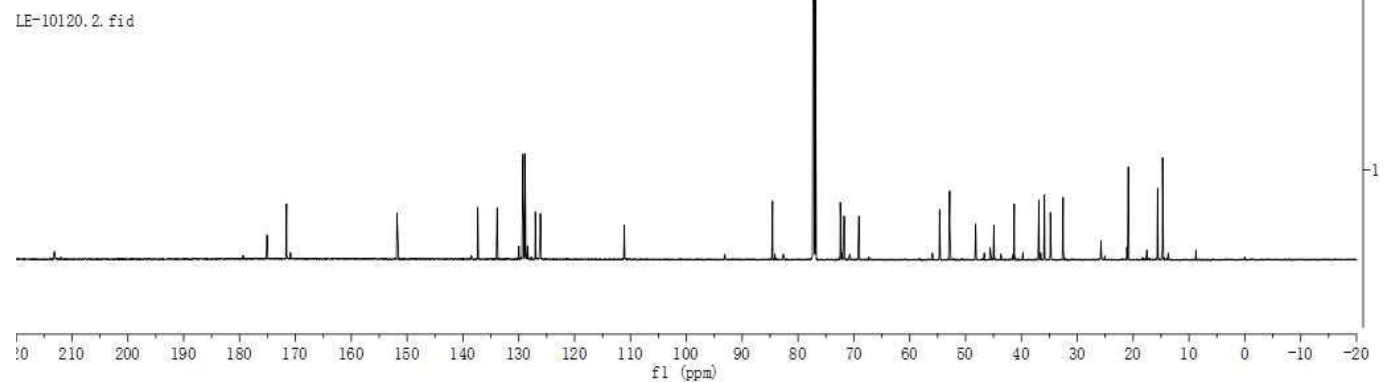

**Fig. S13.** DEPT of 2.

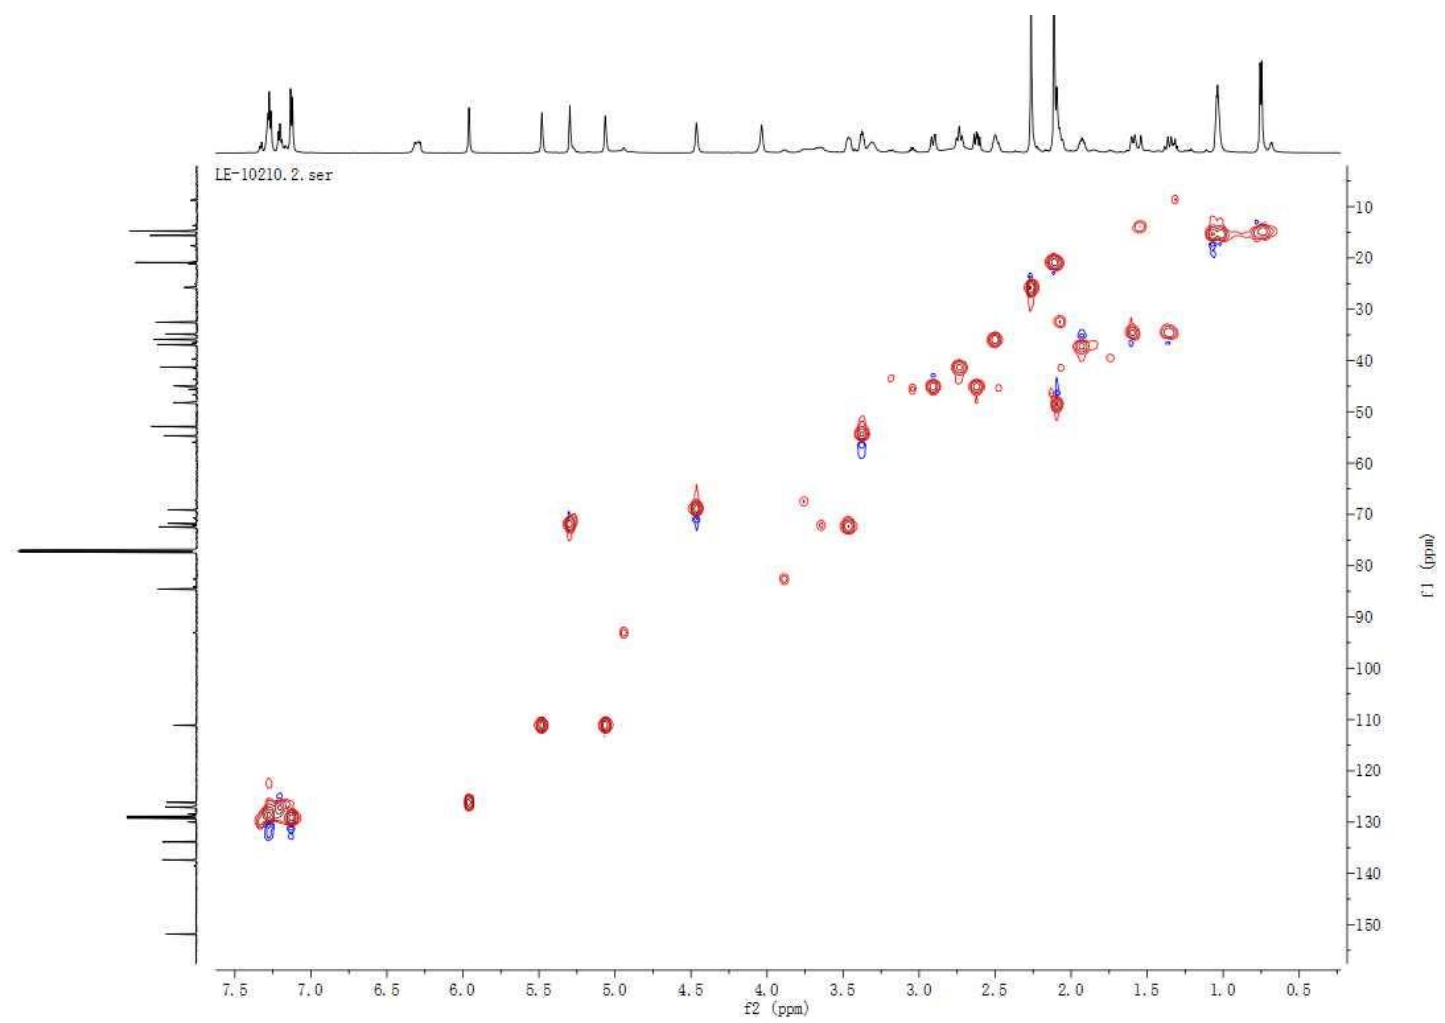

Fig. S14. HSQC of 2.

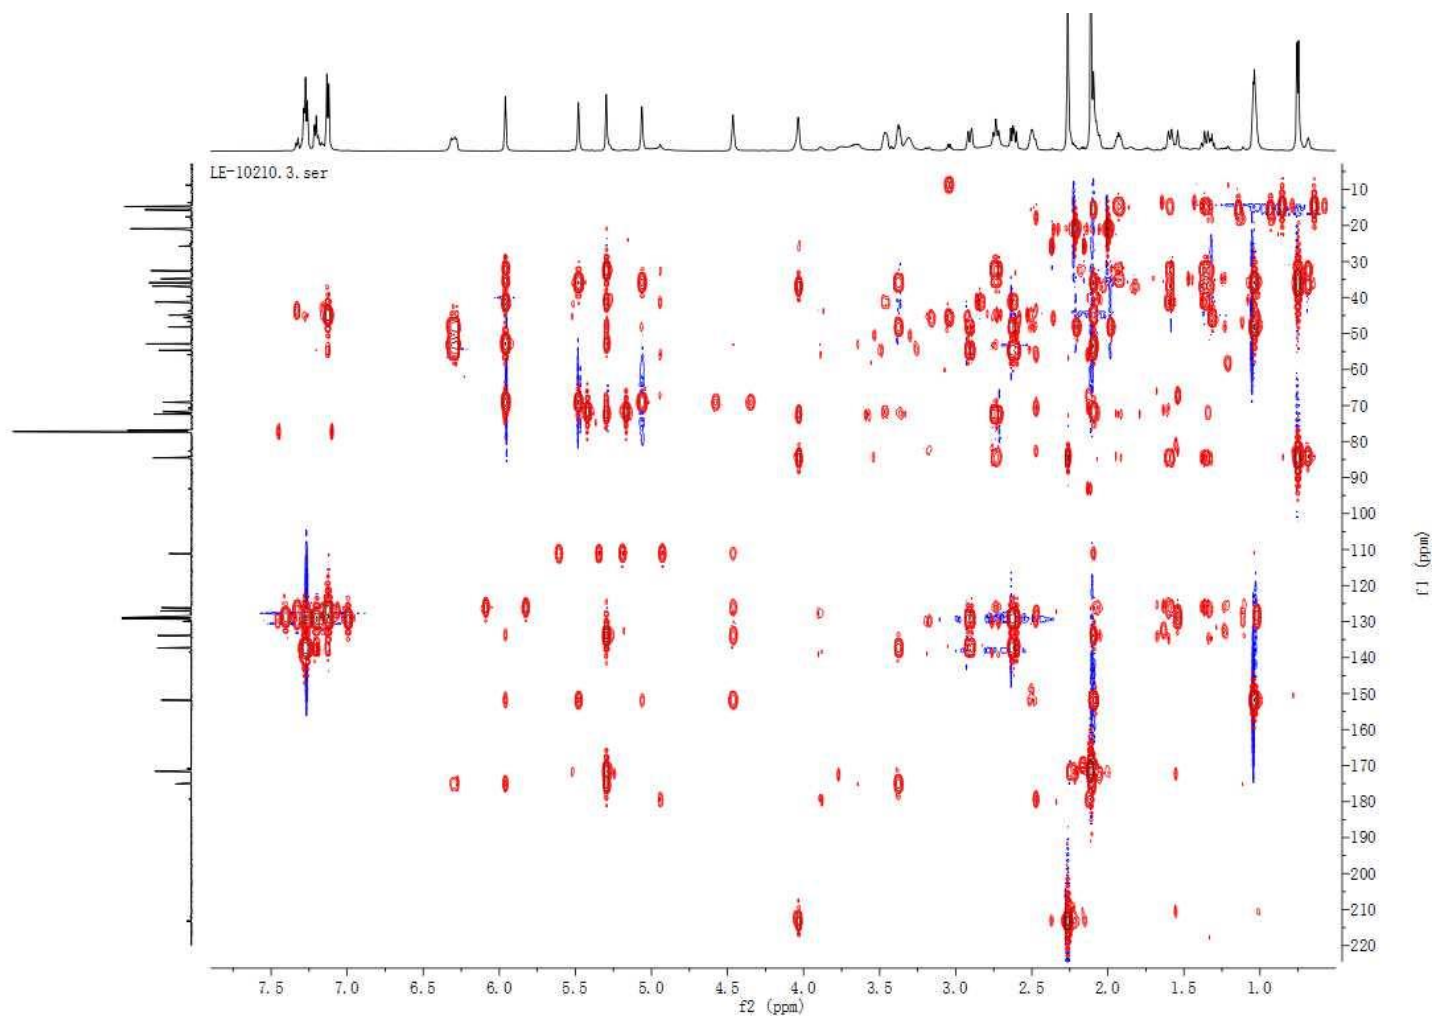

Fig. S15. HMBC of 2.

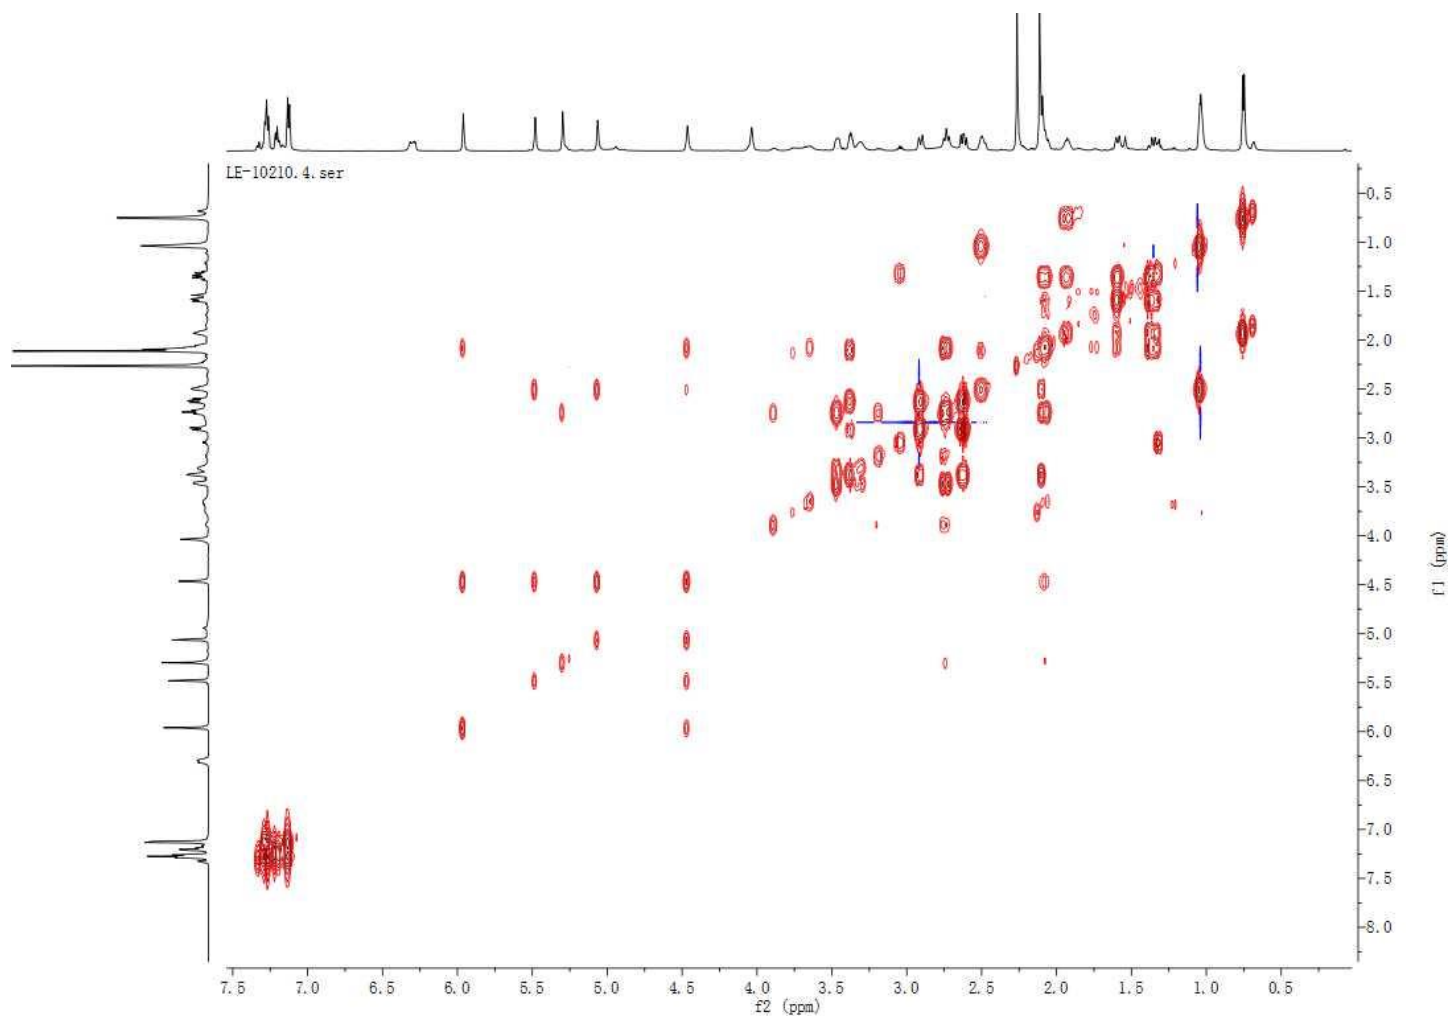

**Fig. S16.**  $^1\text{H}$ - $^1\text{H}$  COSY of **2**.

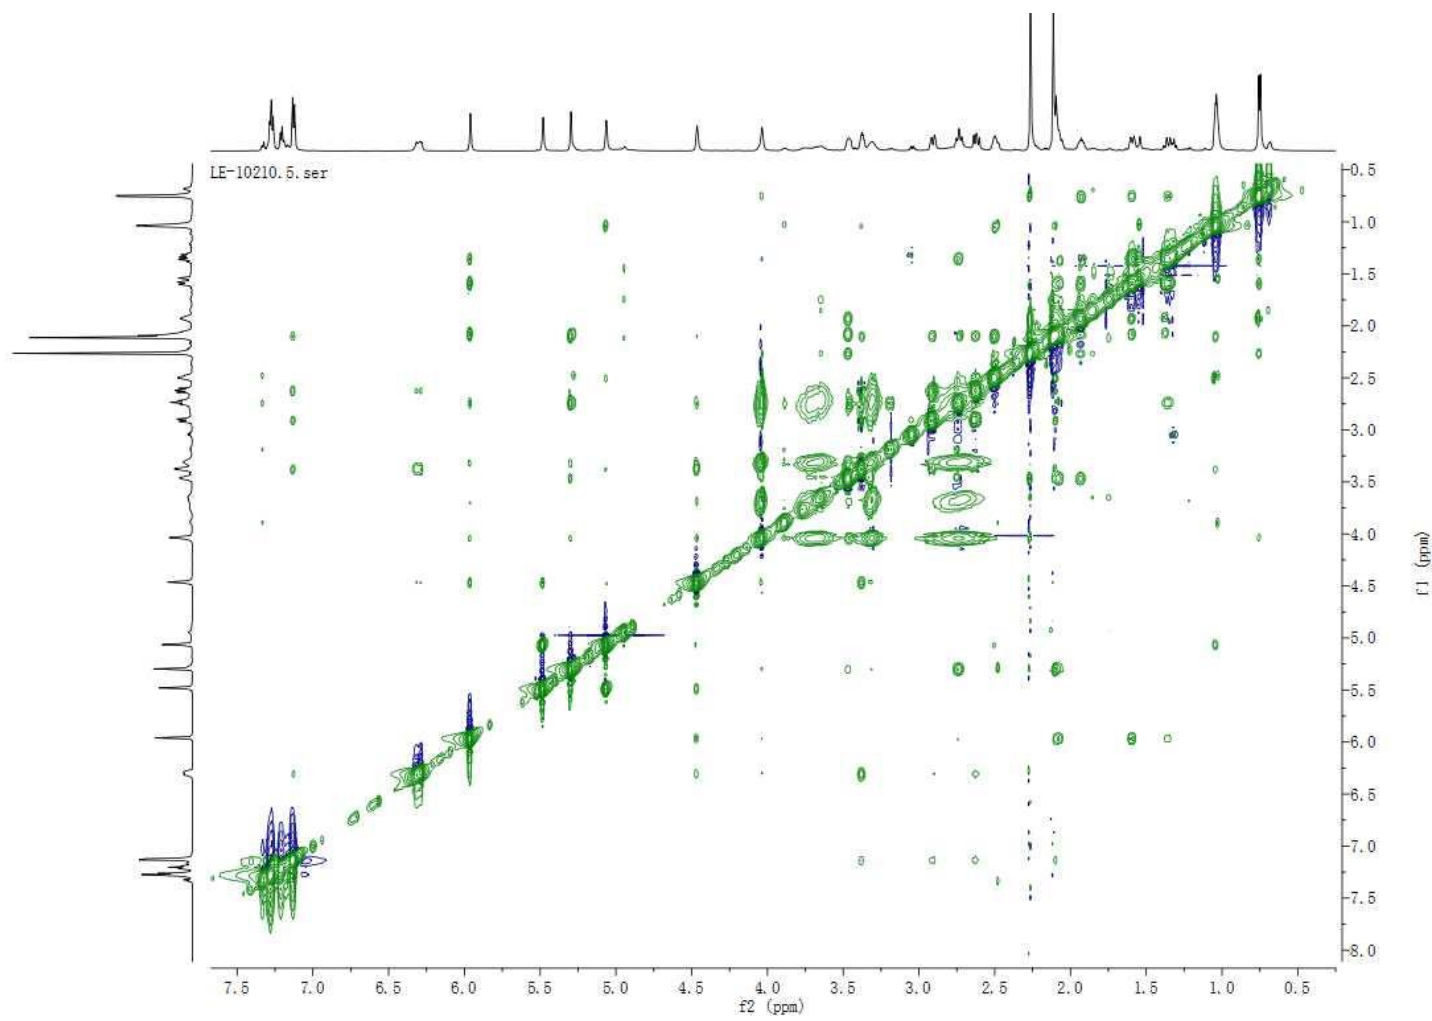

Fig. S17. ROESY of 2.

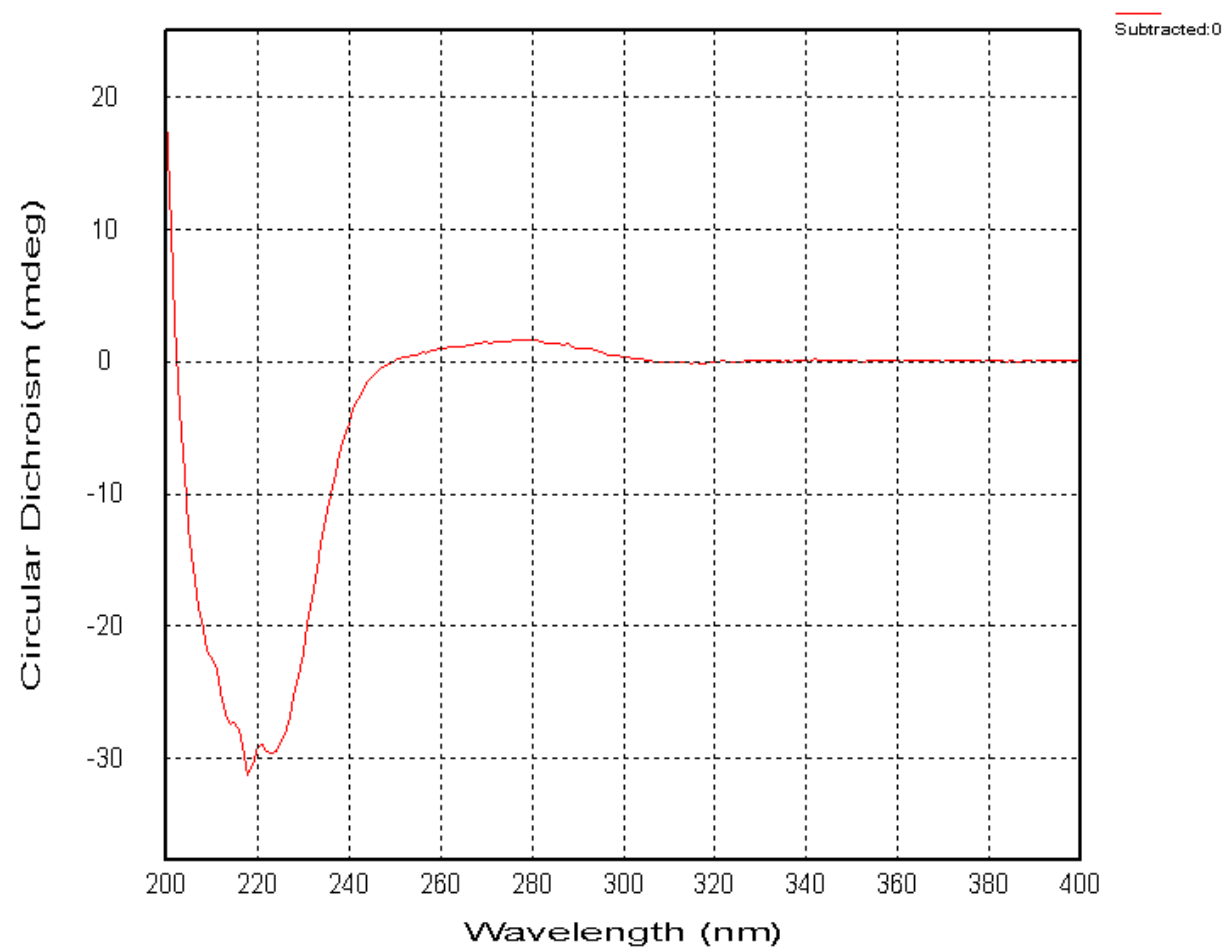

**Fig. S18.** Experimental ECD of **2**.



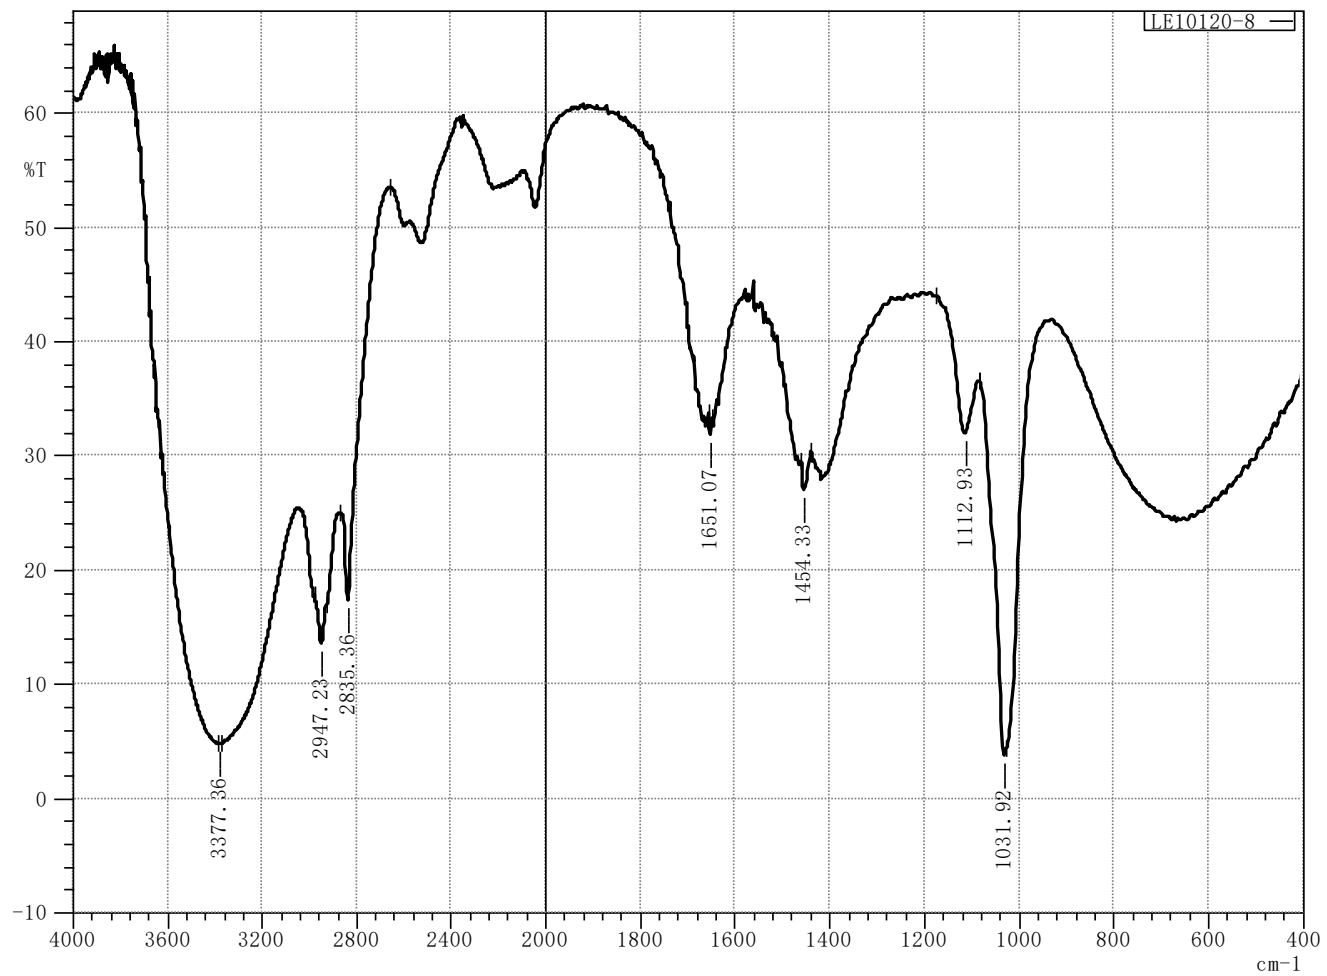

Fig. S19. IR of 2.

LE10120 #1553 RT: 13.54 AV: 1 NL: 3.03E8  
T: FTMS + p ESI Full lock ms [100.0000-1000.0000]

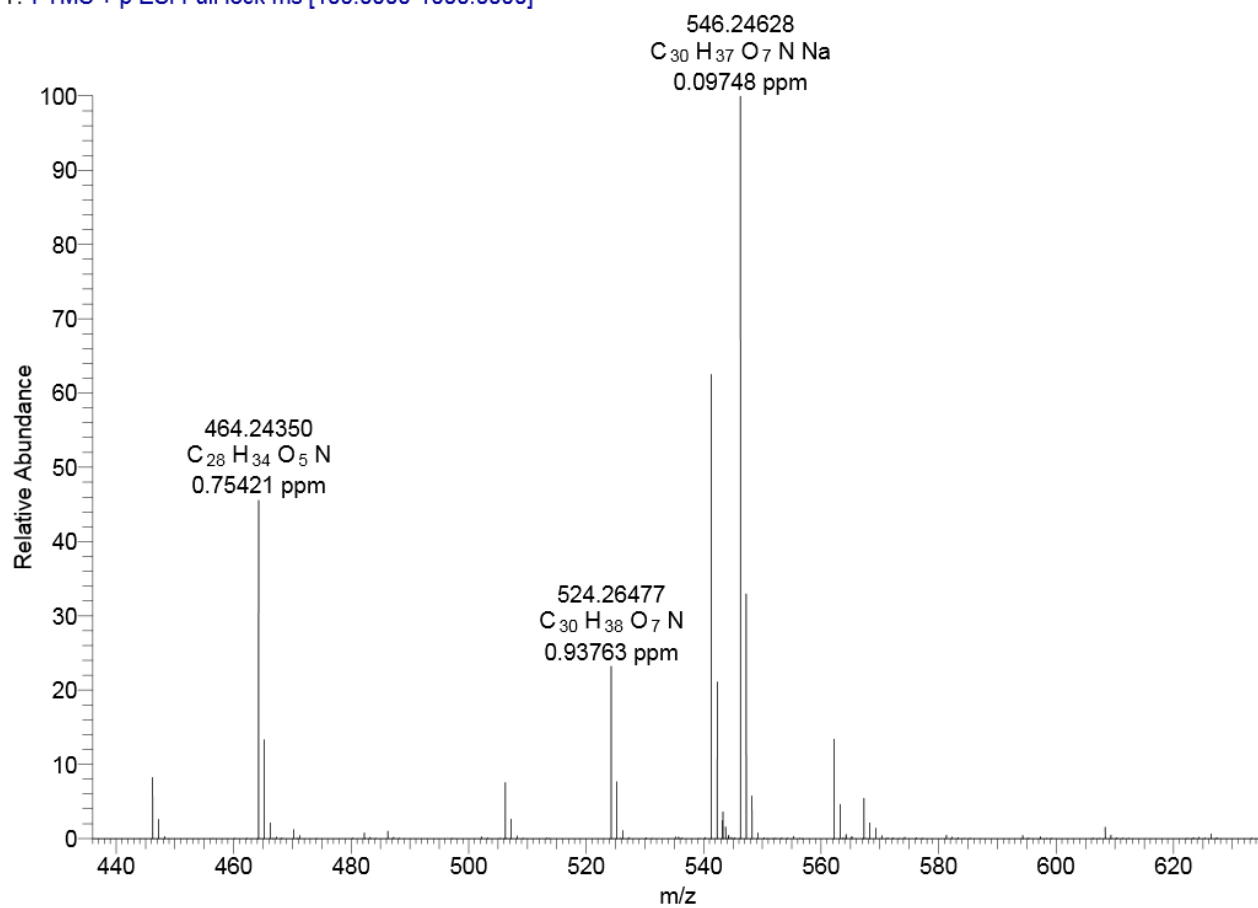

Fig. S20. HRESIMS of 2.

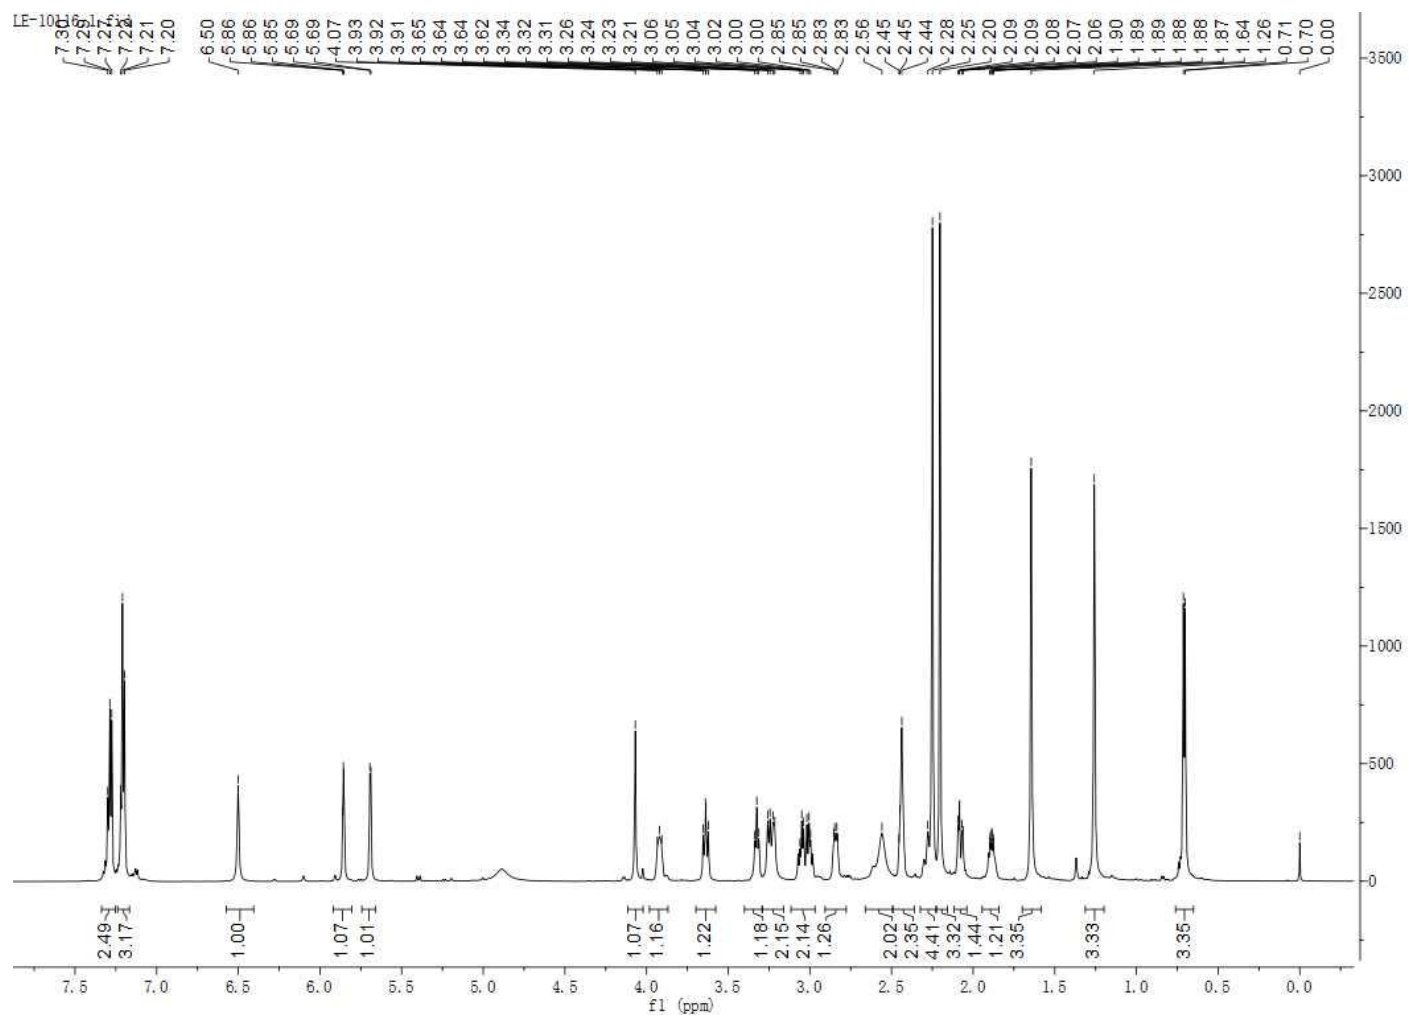

Fig. S21.  $^1\text{H}$  NMR of **3** ( $\text{CDCl}_3$ , 600 MHz).

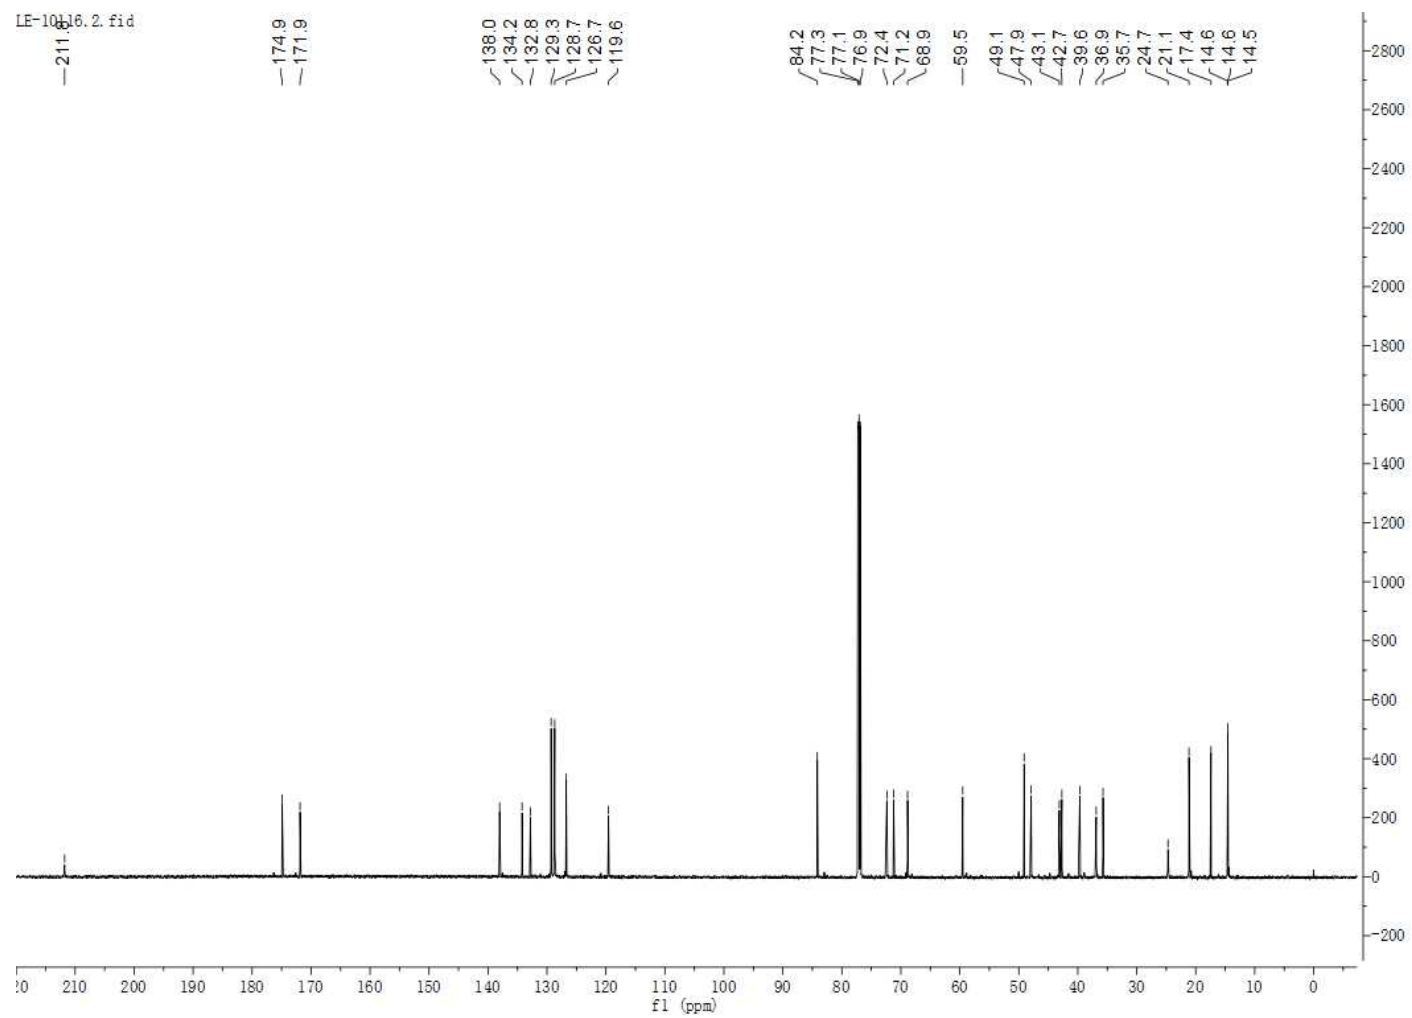

**Fig. S22.**  $^{13}\text{C}$  NMR of **3** ( $\text{CDCl}_3$ , 150 MHz).

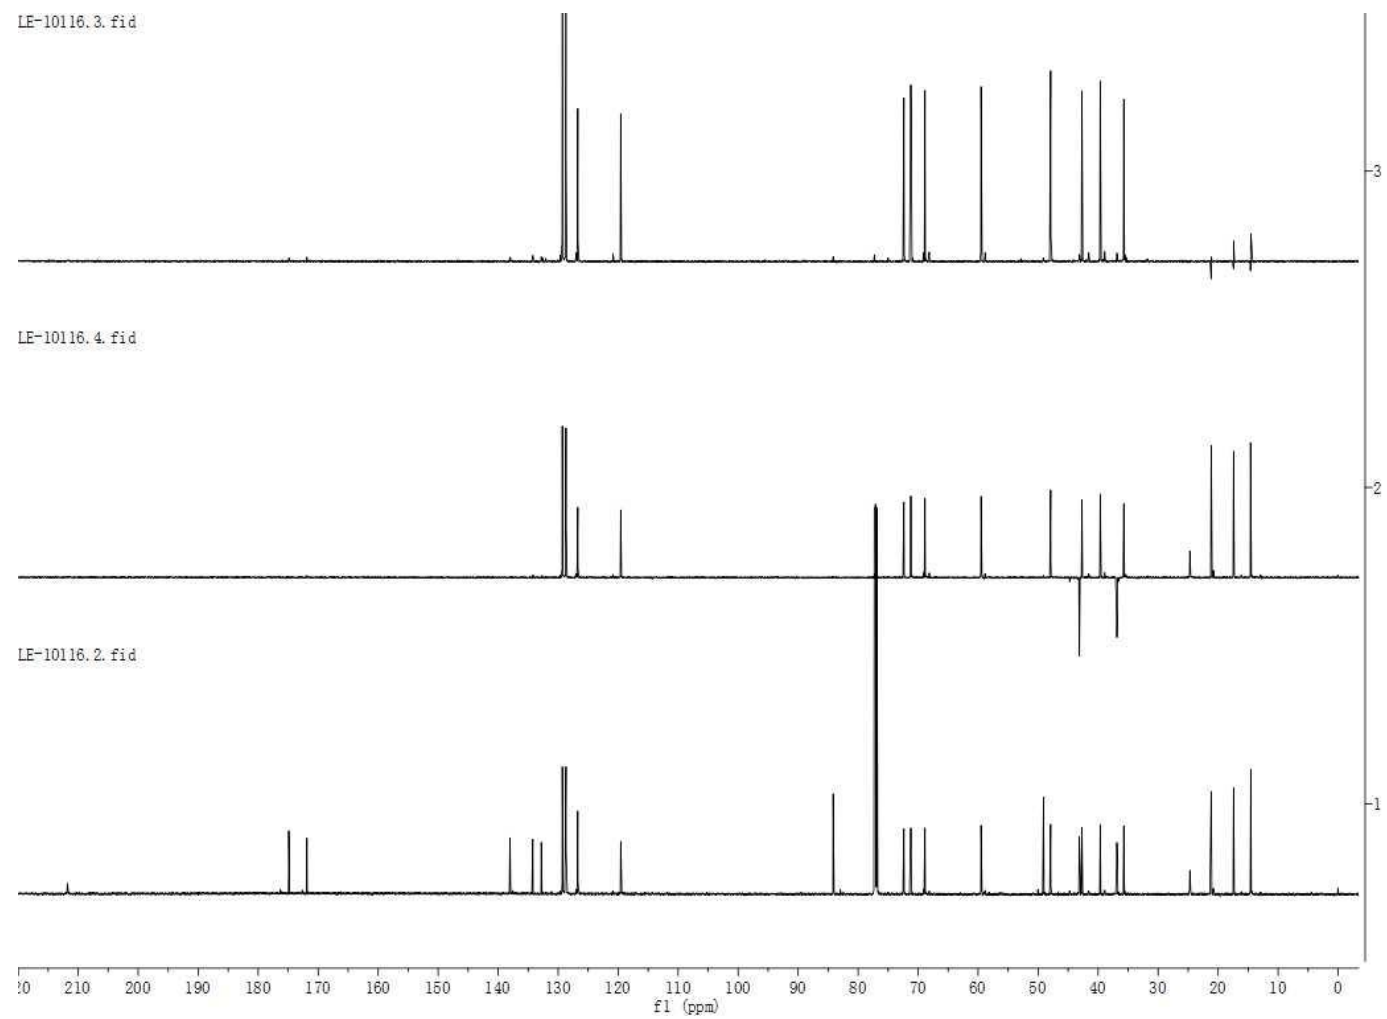

Fig. S23. DEPT of 3.

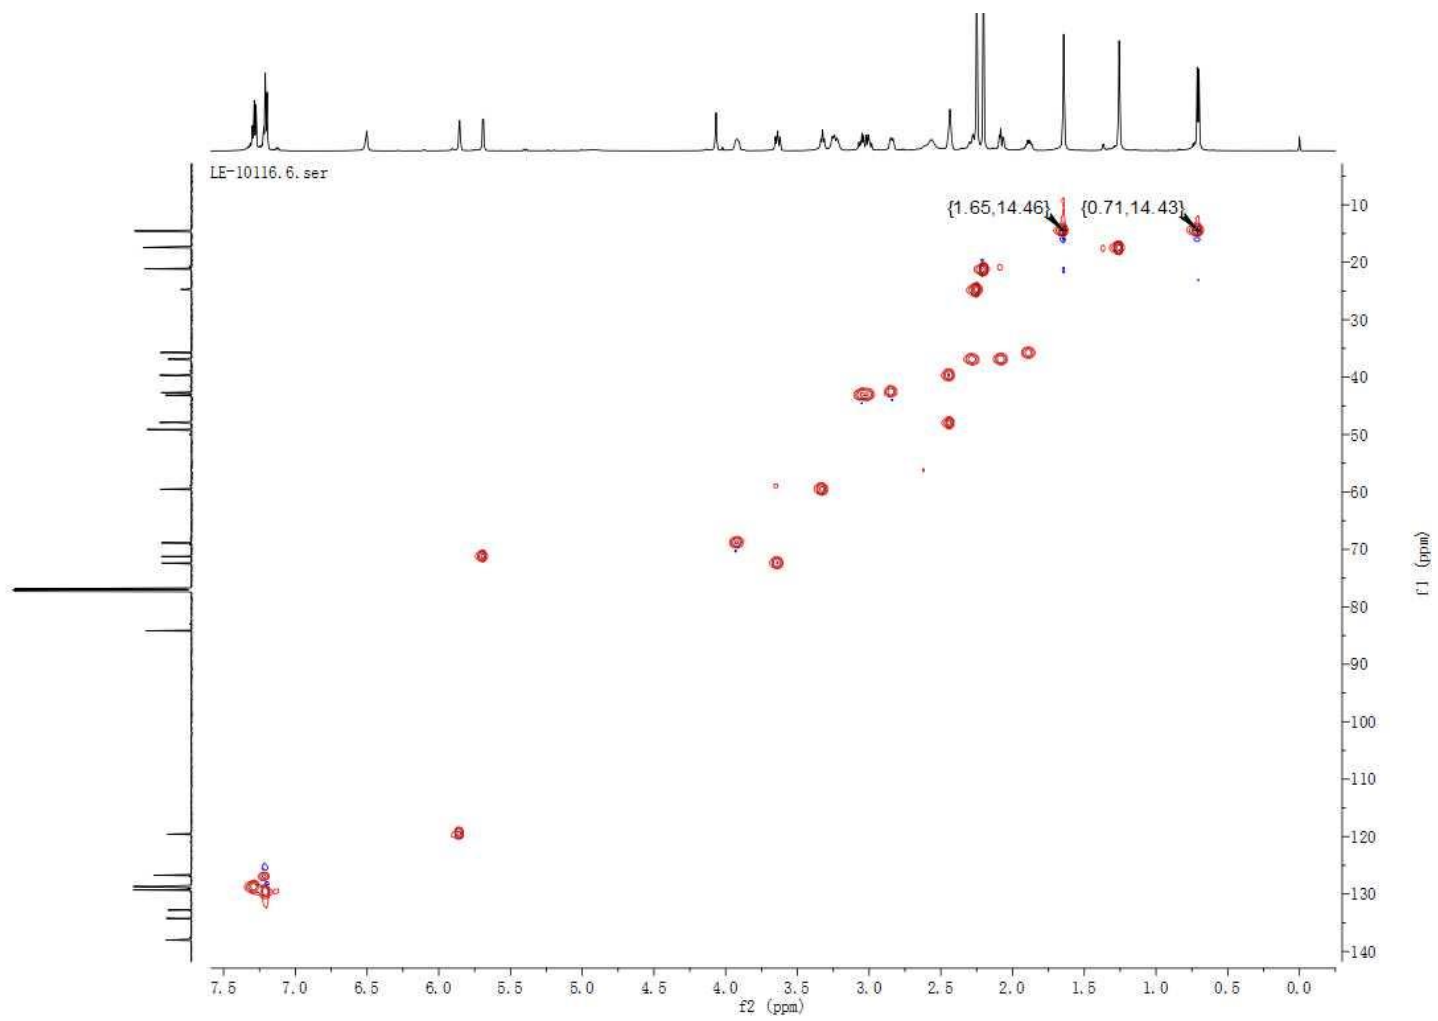

Fig. S24. HSQC of 3.

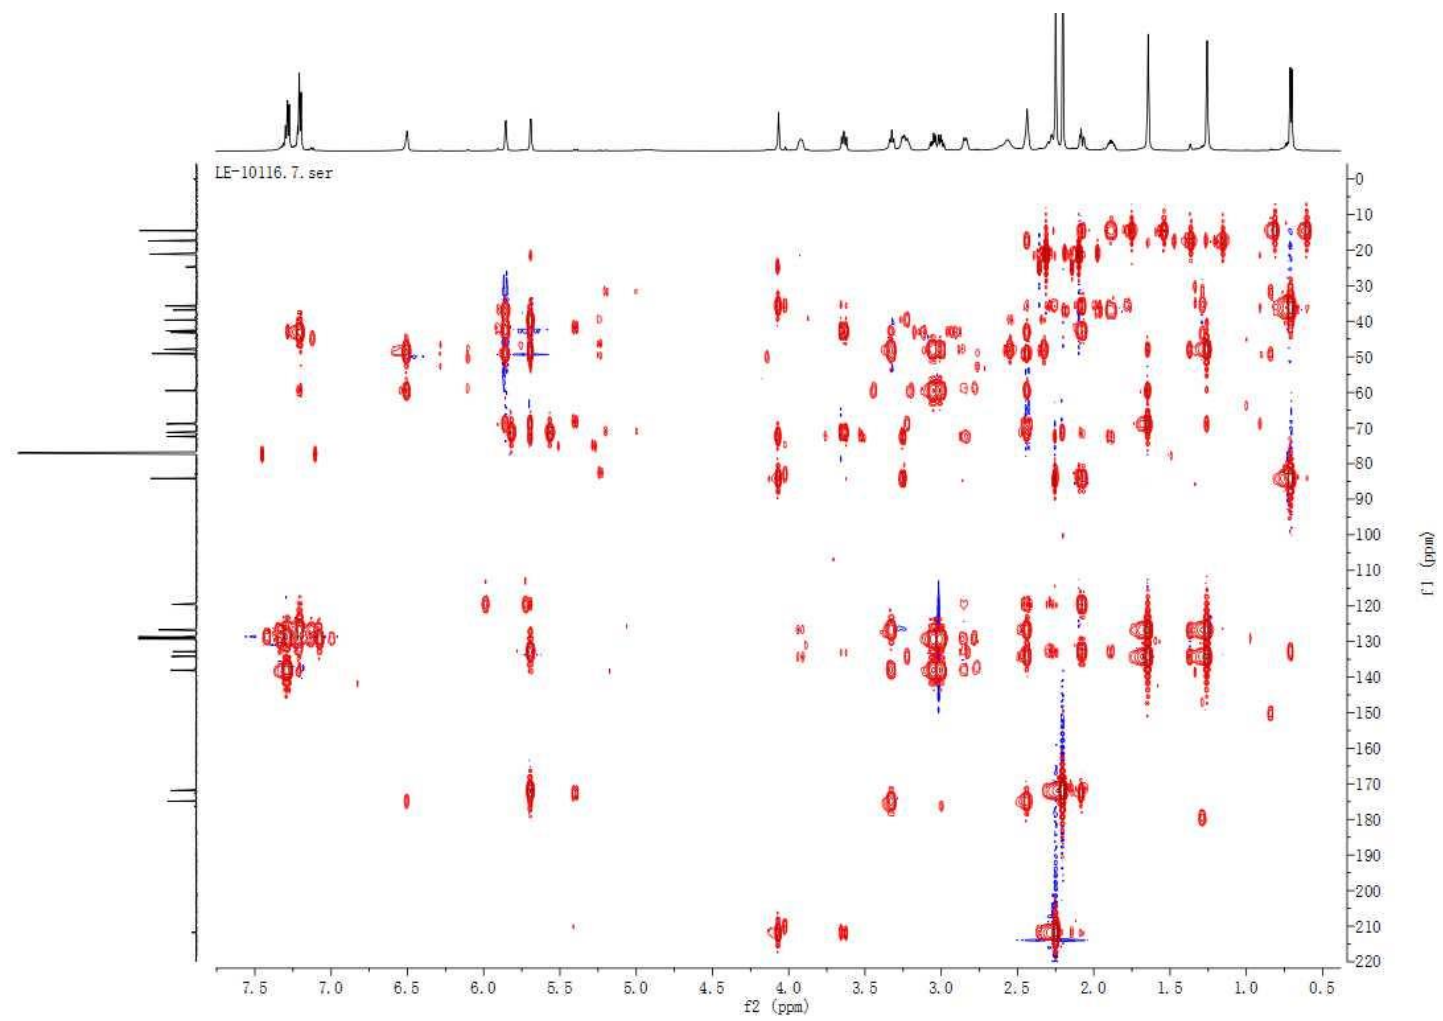

Fig. S25. HMBC of 3.

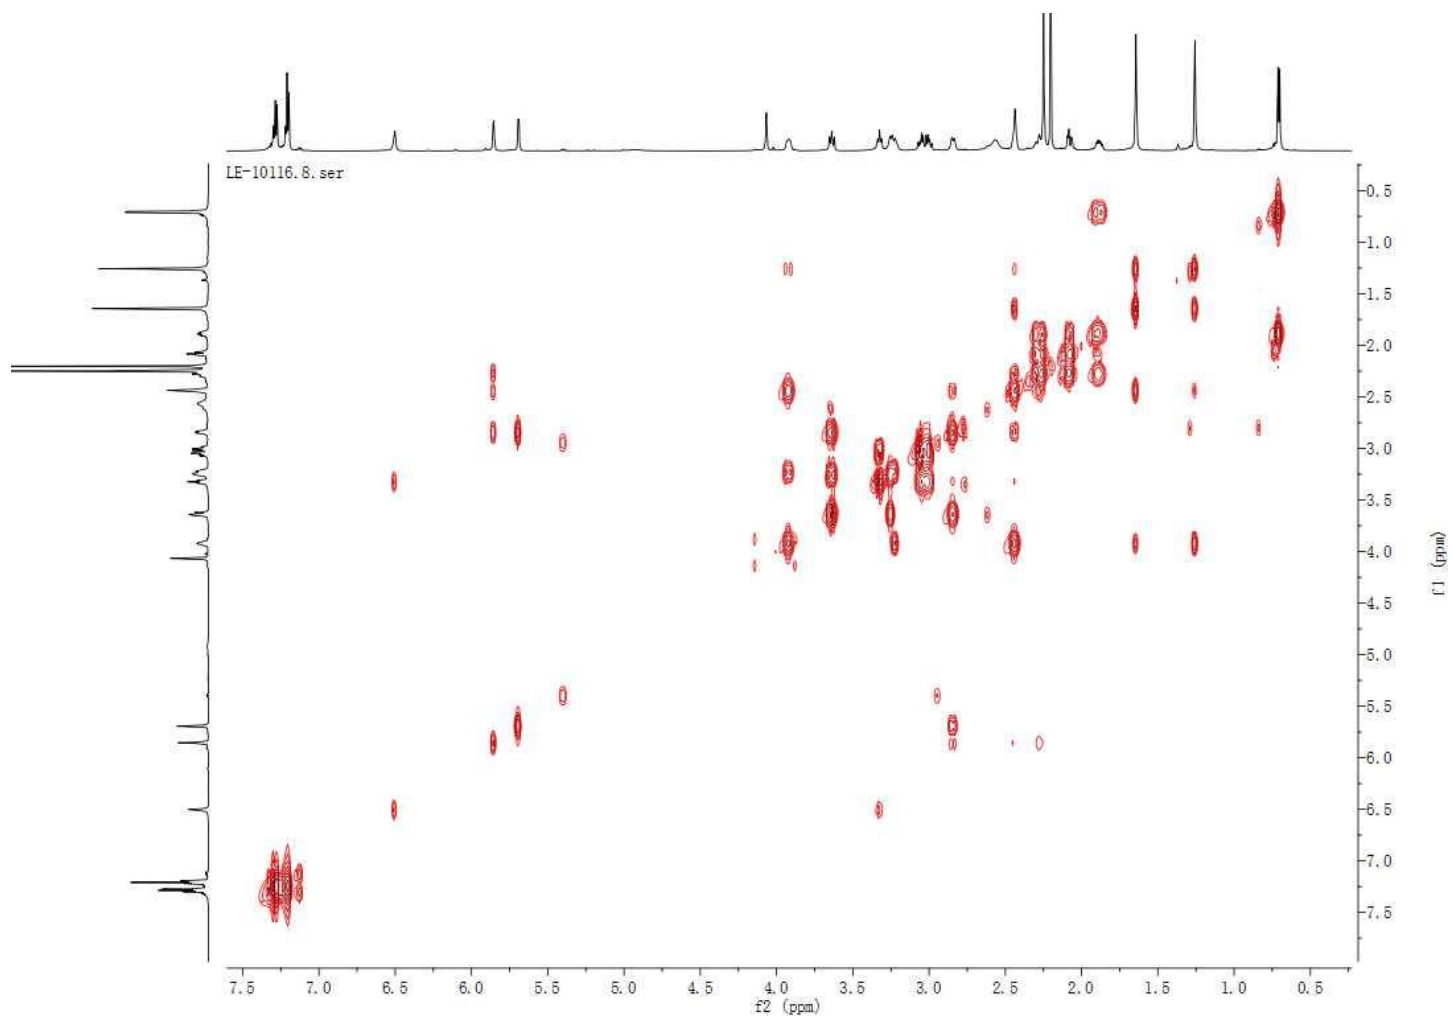

**Fig. S26.**  $^1\text{H}$ - $^1\text{H}$  COSY of **3**.



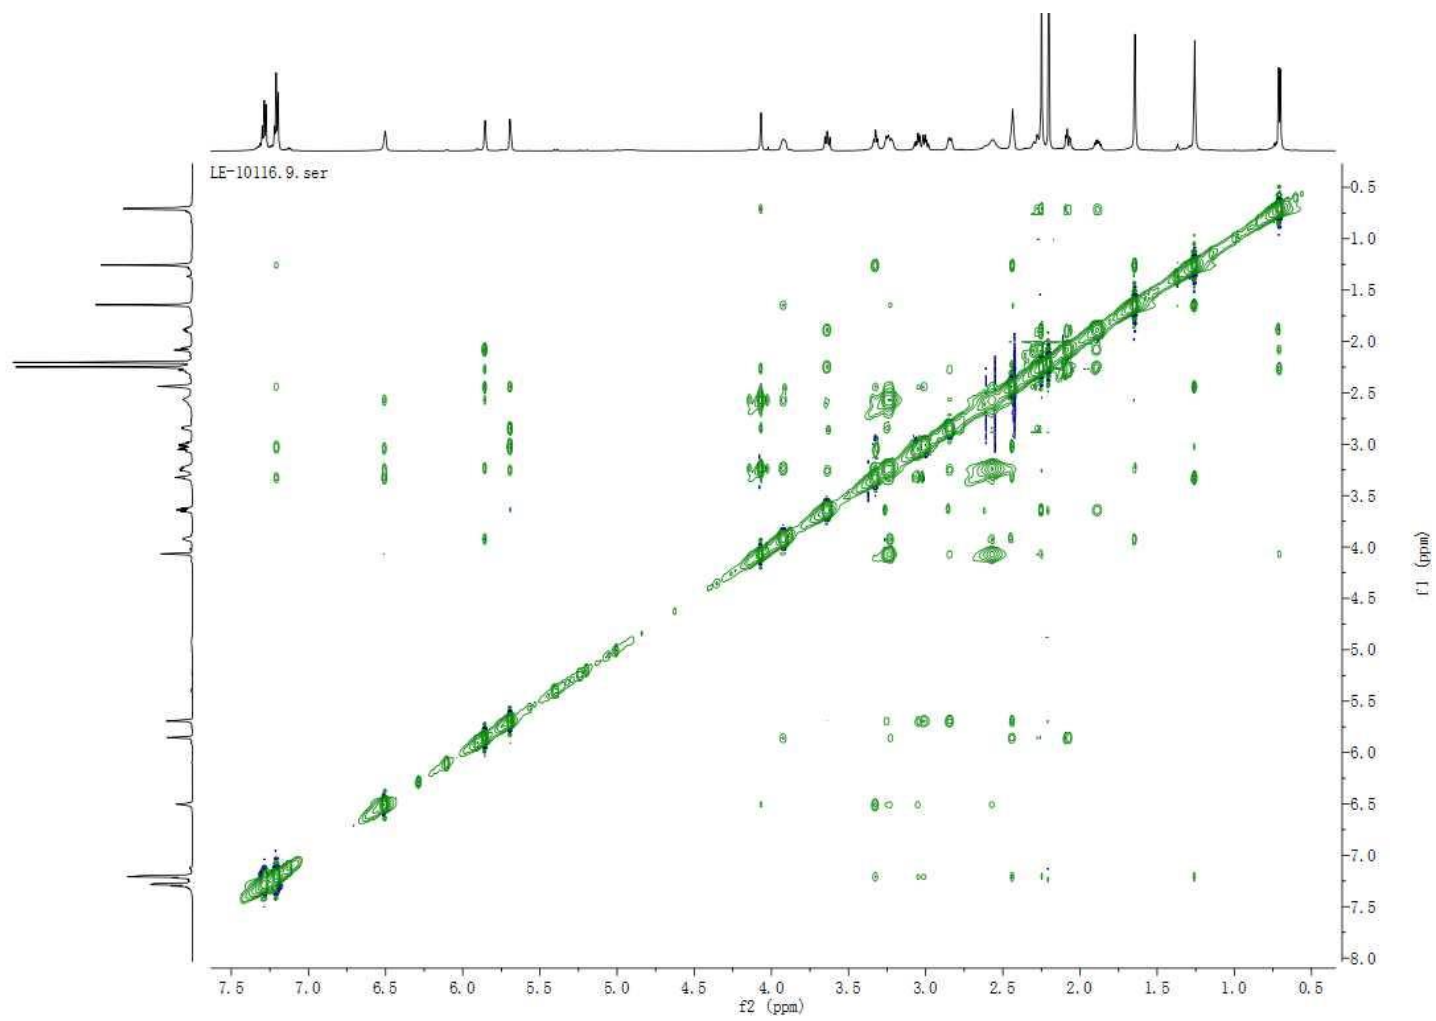

Fig. S27. ROESY of 3.

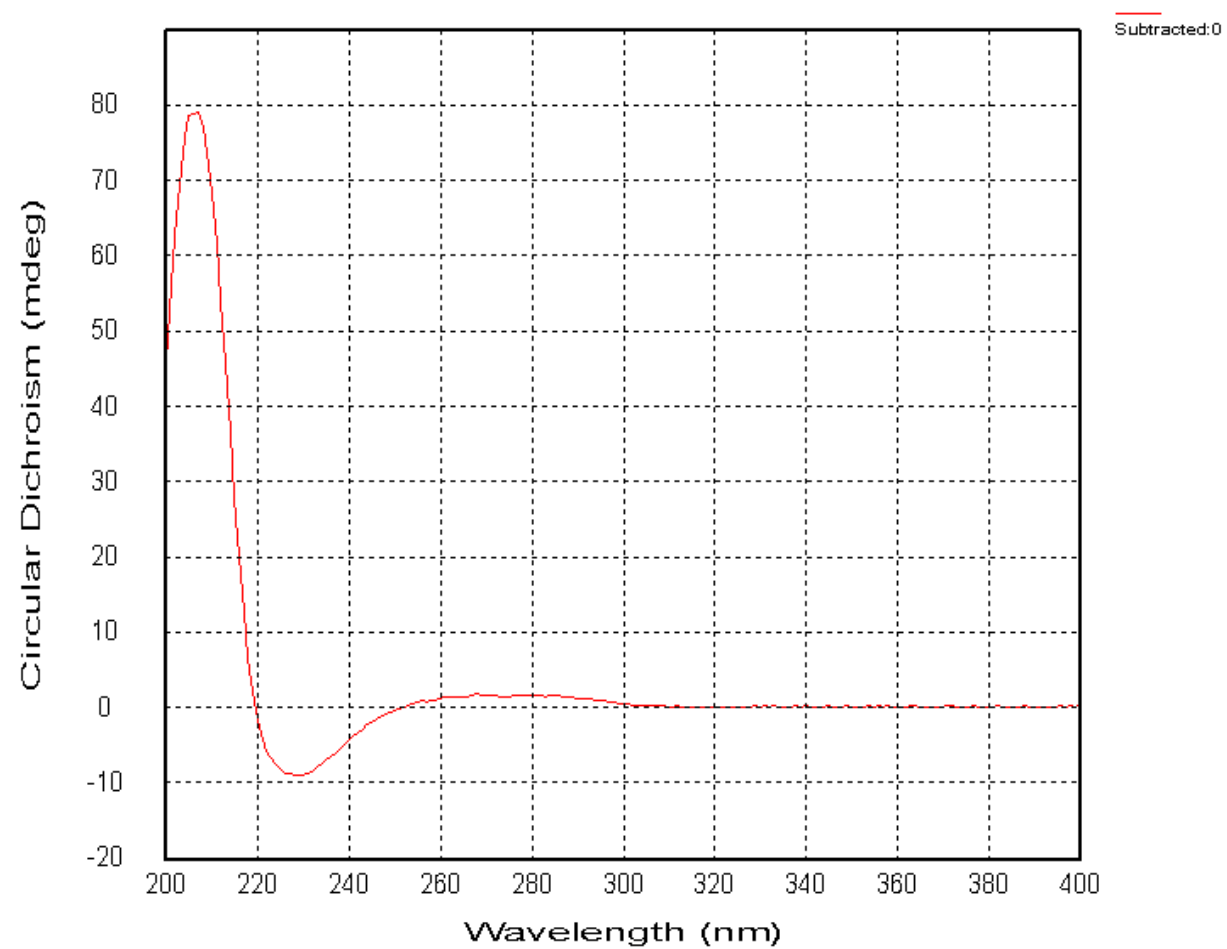

Fig. S28. Experimental ECD of 3.

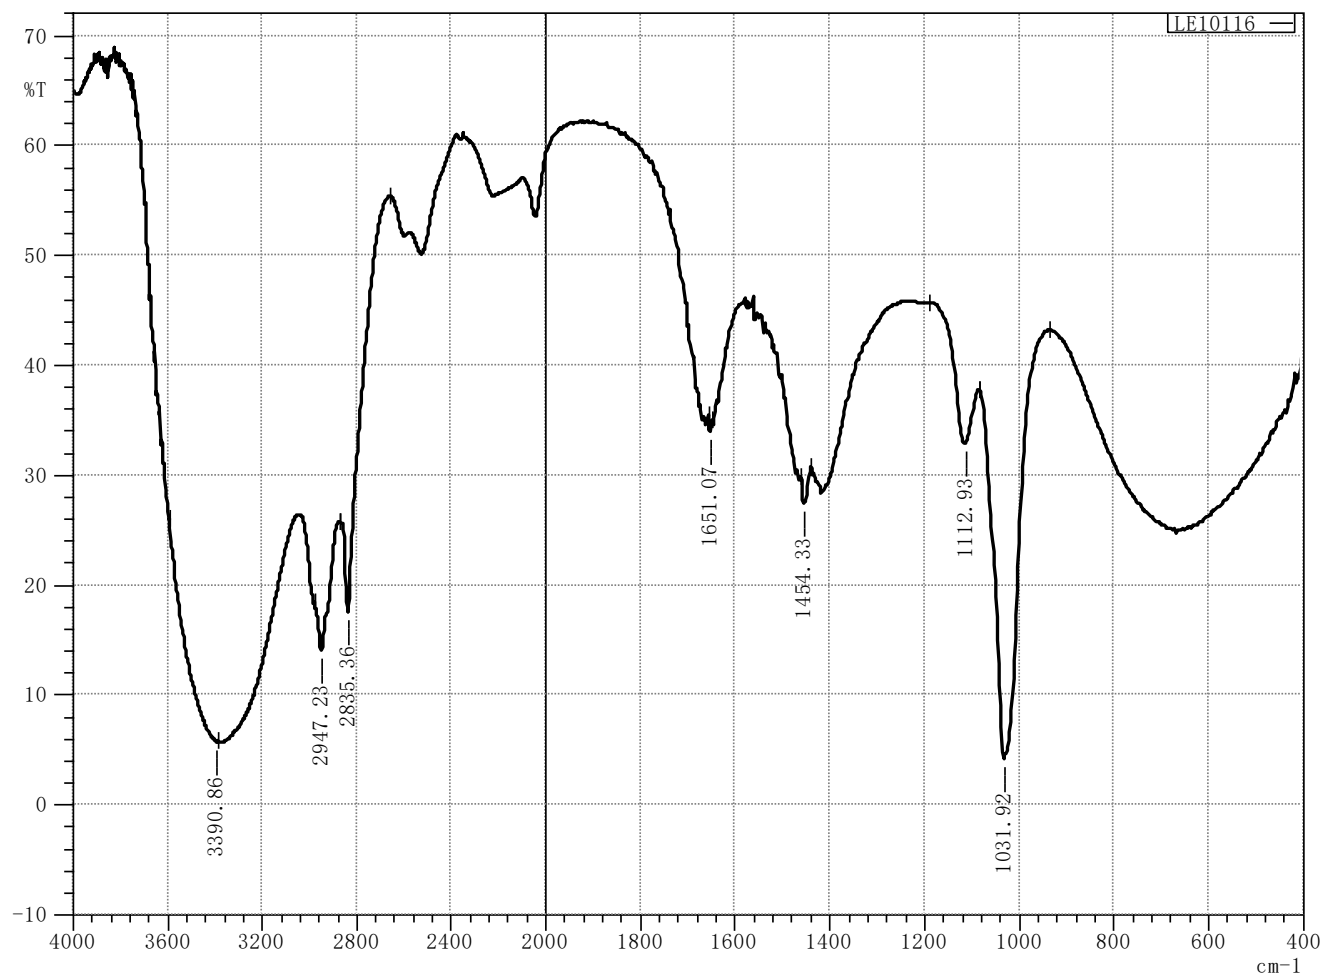

Fig. S29. IR of 3.

LE10-116 #1557 RT: 13.58 AV: 1 NL: 8.89E8  
T: FTMS + p ESI Full lock ms [250.0000-2000.0000]

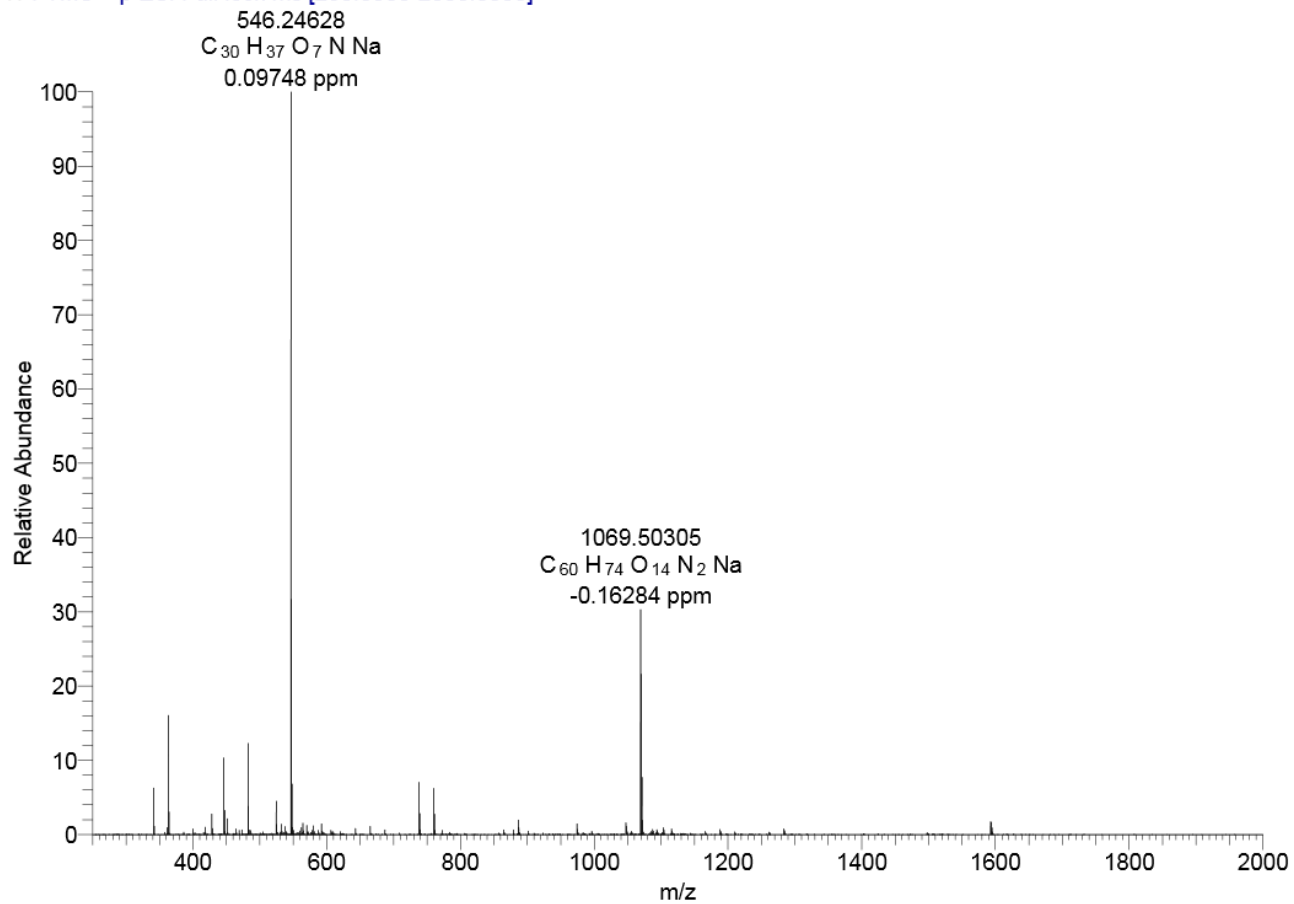

Fig. S30. HRESIMS of 3.

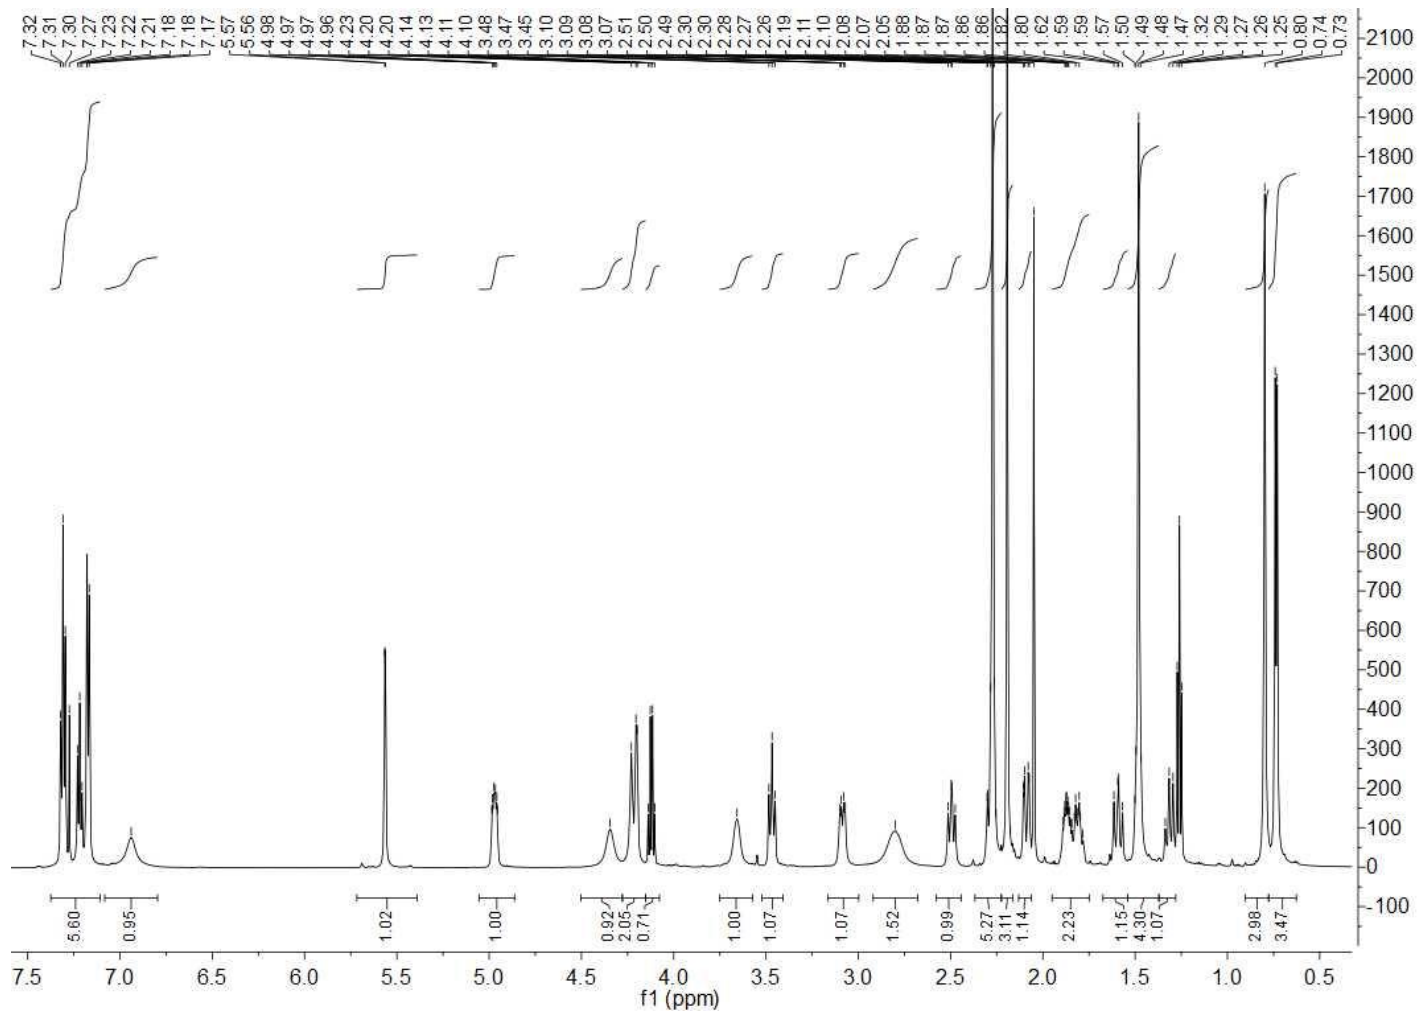

**Fig. S31.**  $^1\text{H}$  NMR of **4** ( $\text{CDCl}_3$ , 600 MHz).

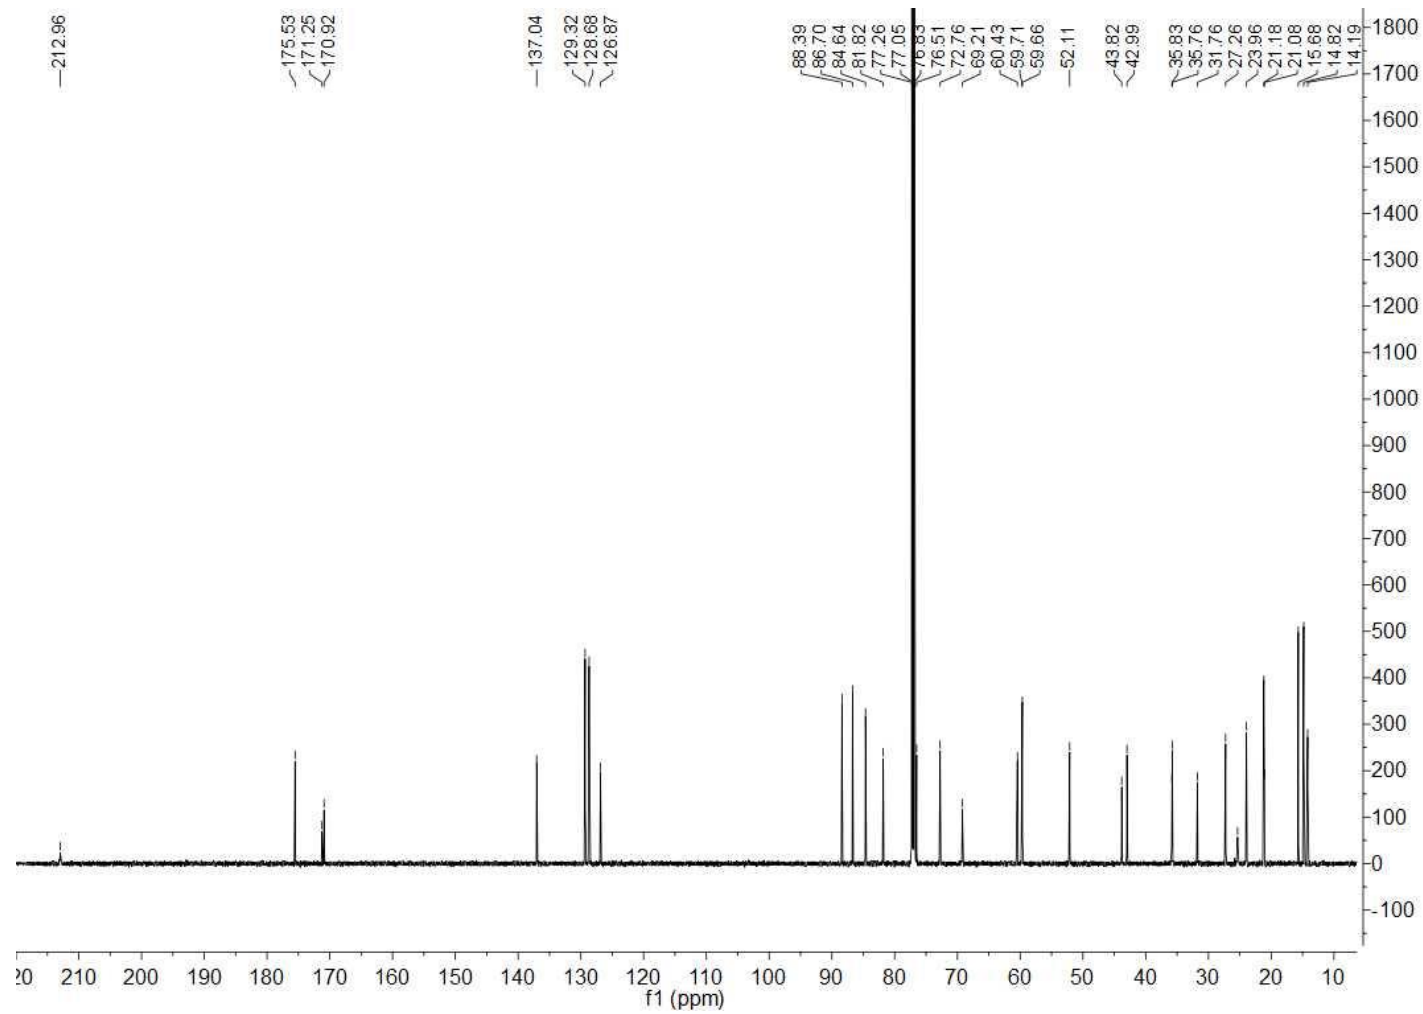

Fig. S32.  $^{13}\text{C}$  NMR of **4** ( $\text{CDCl}_3$ , 150 MHz).

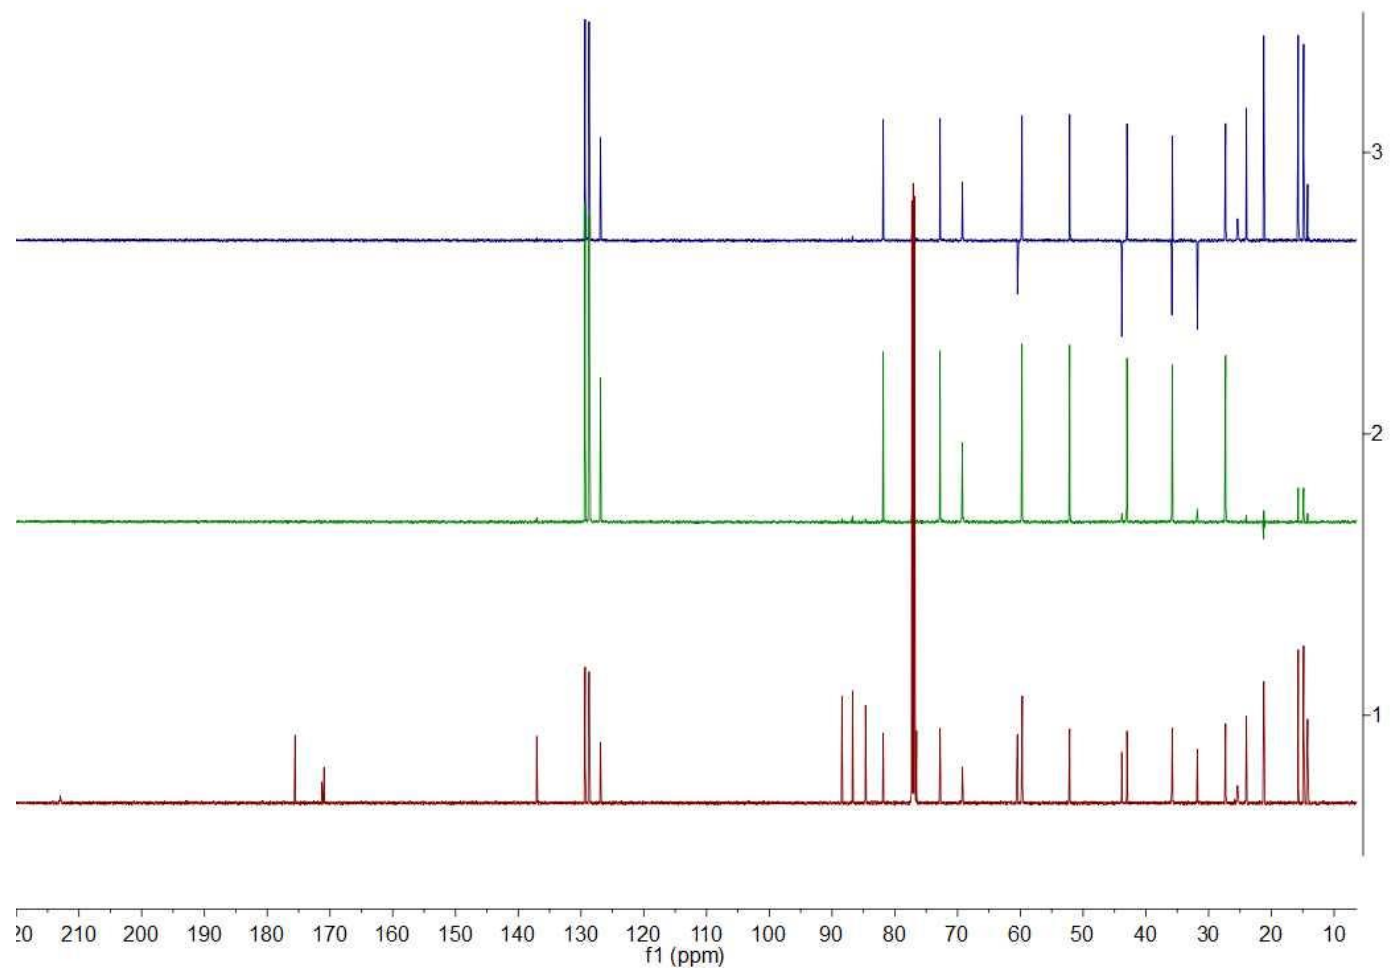

**Fig. S33.** DEPT of 4.

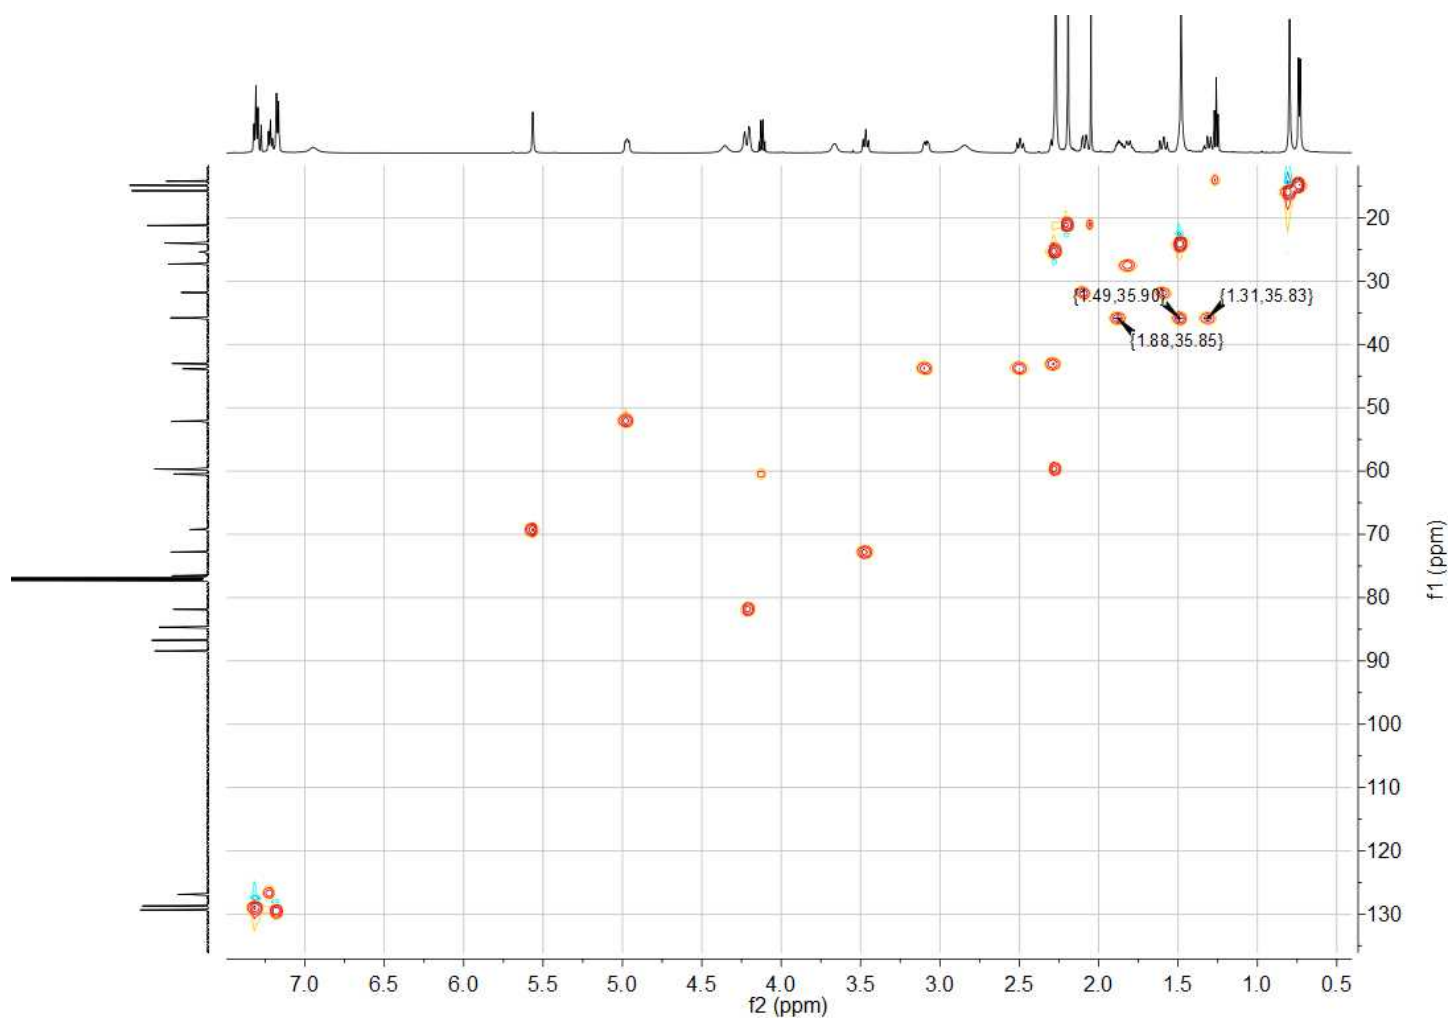

Fig. S34. HSQC of 4.



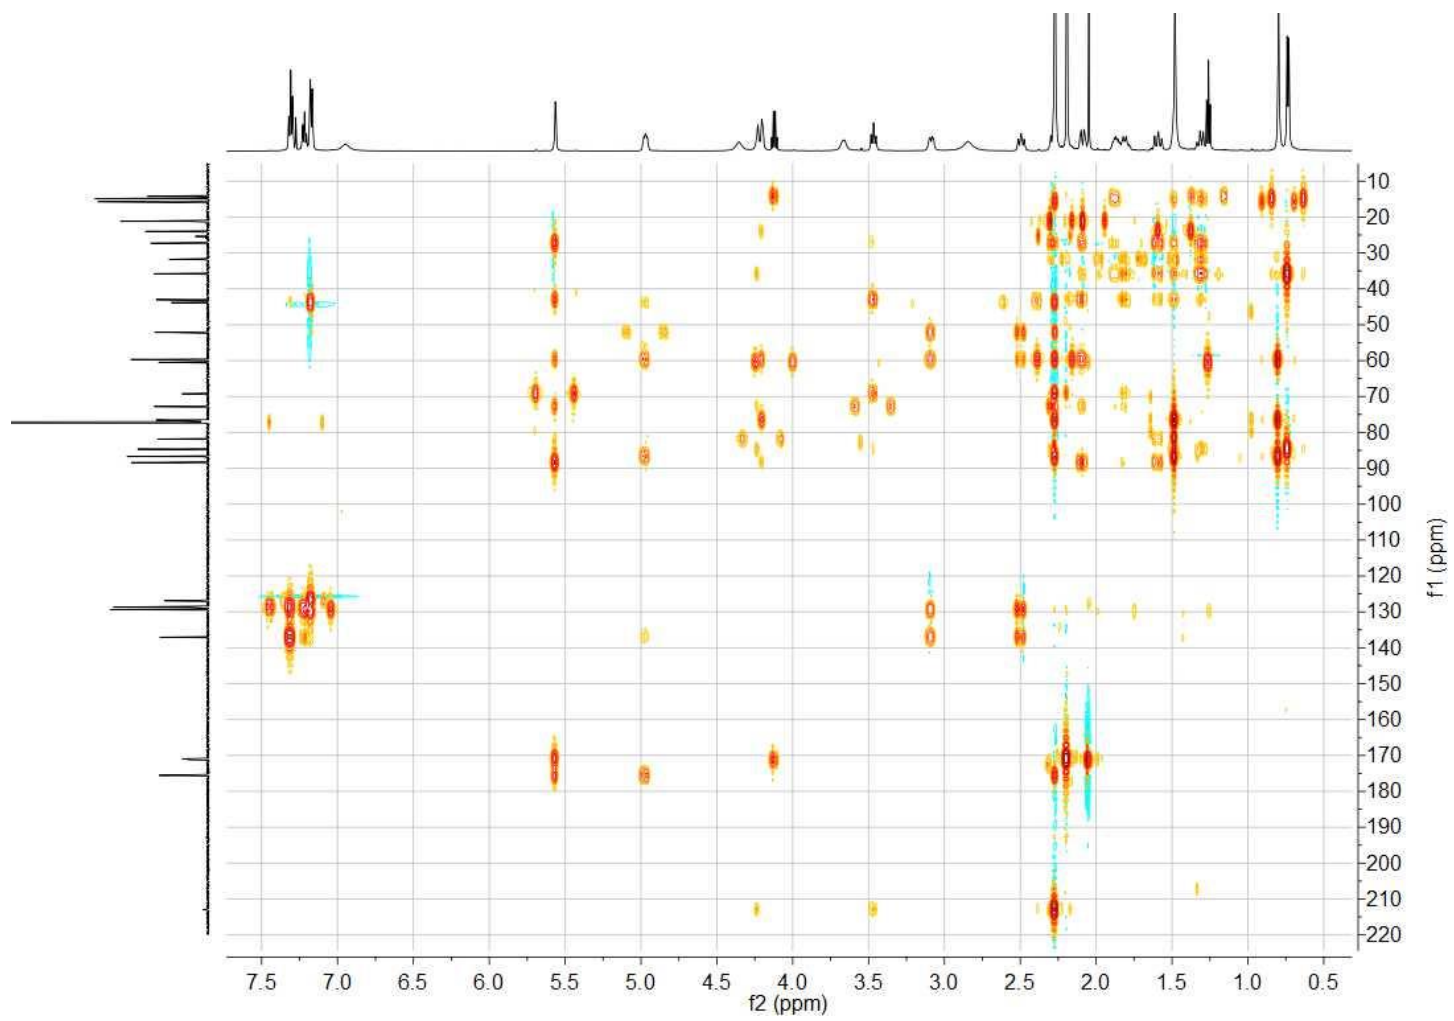

Fig. S35. HMBC of 4.

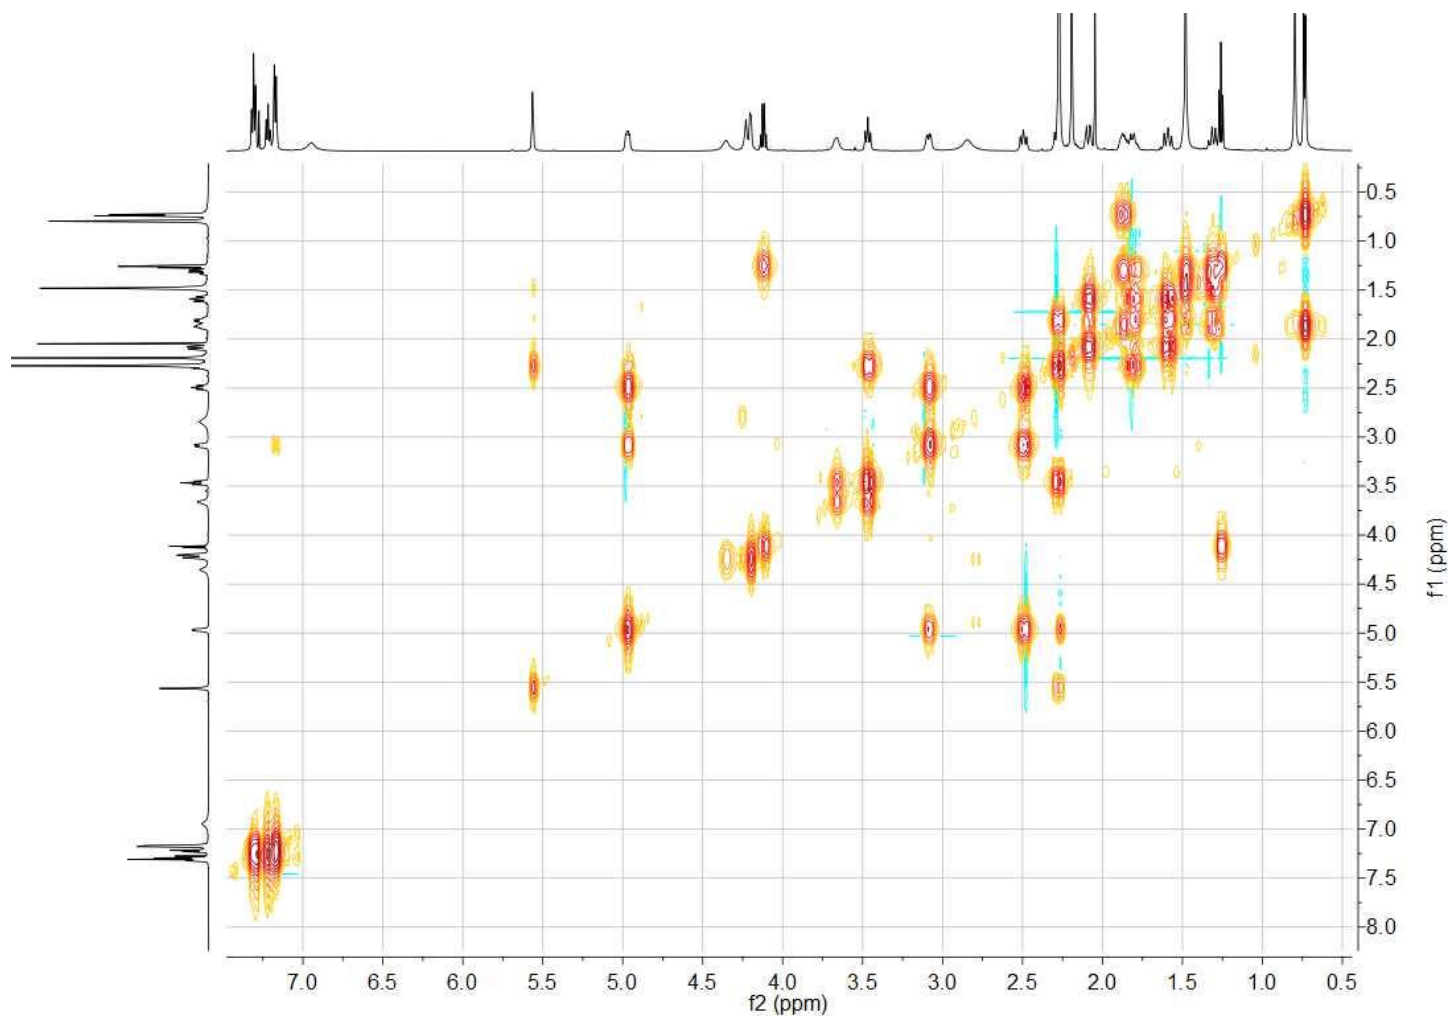

Fig. S36.  $^1\text{H}$ - $^1\text{H}$  COSY of 4.

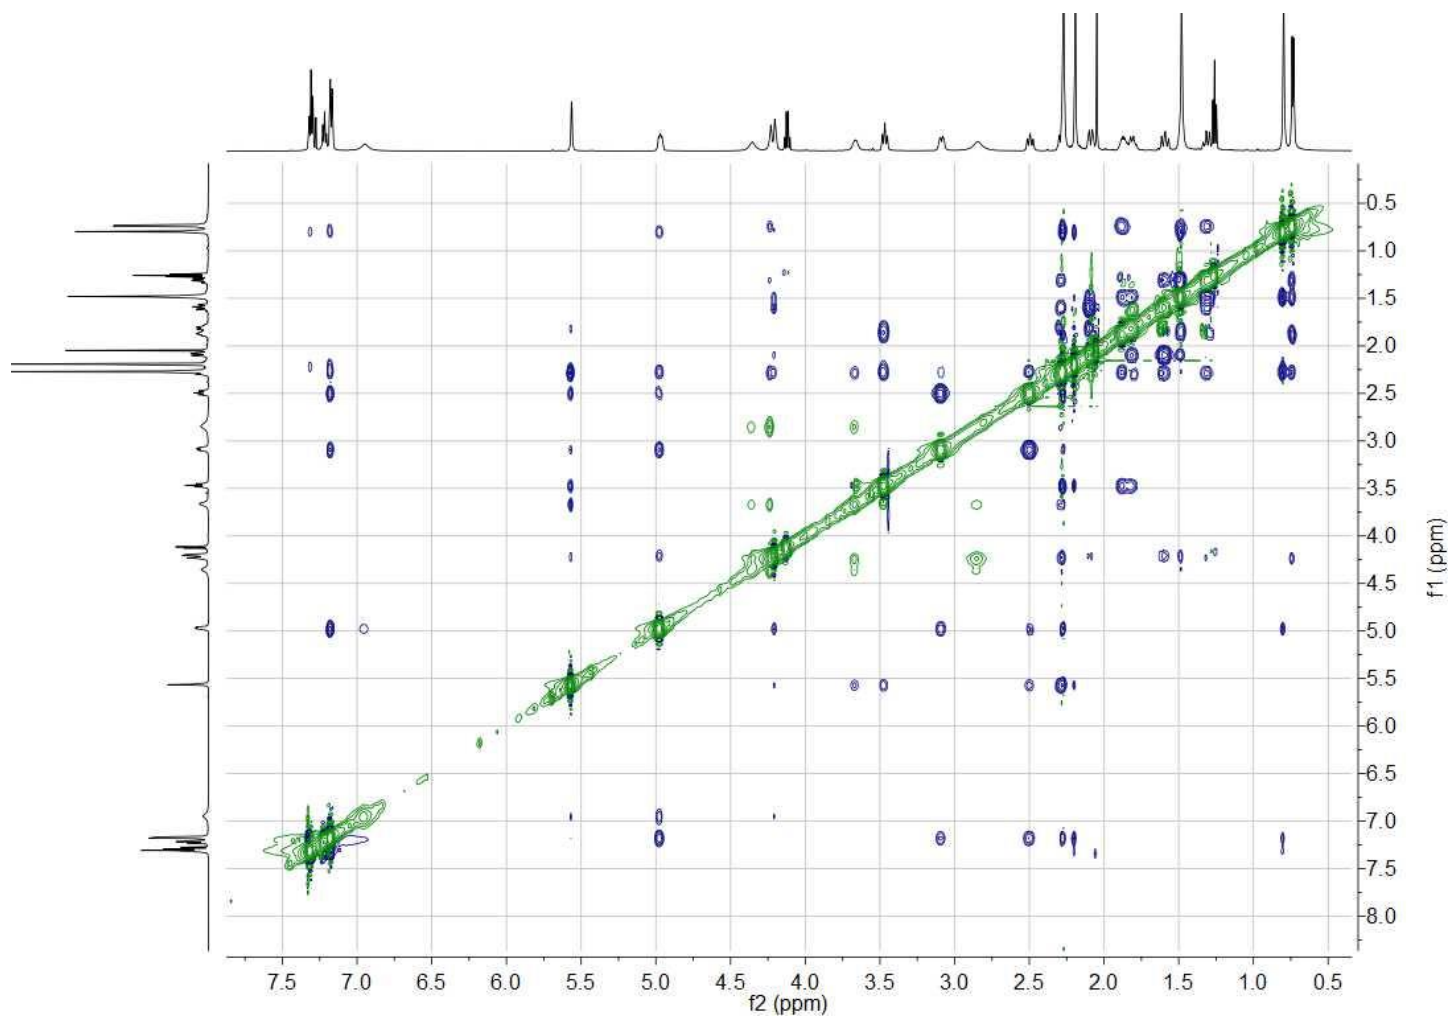

Fig. S37. ROESY of 4.

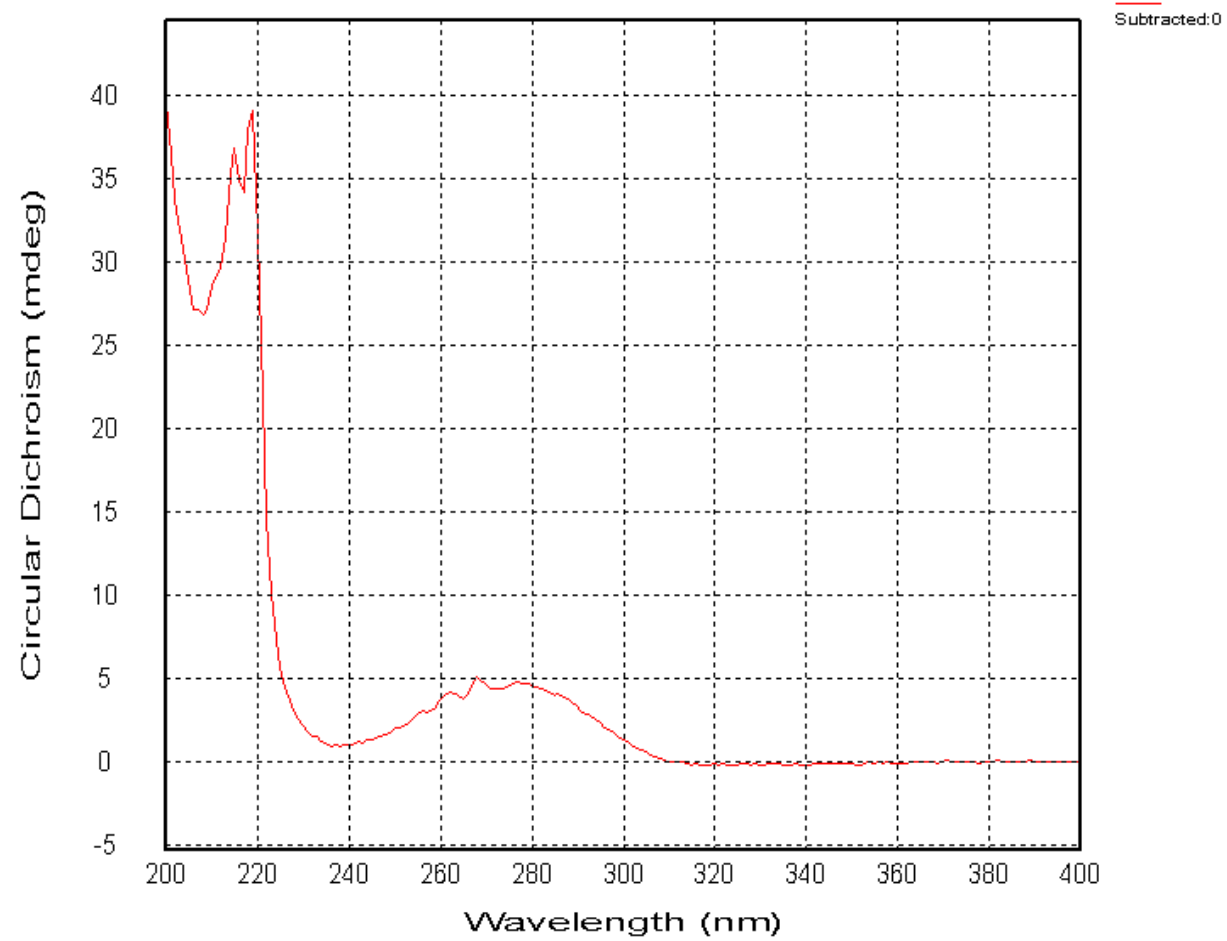

Fig. S38. Experimental ECD of 4.

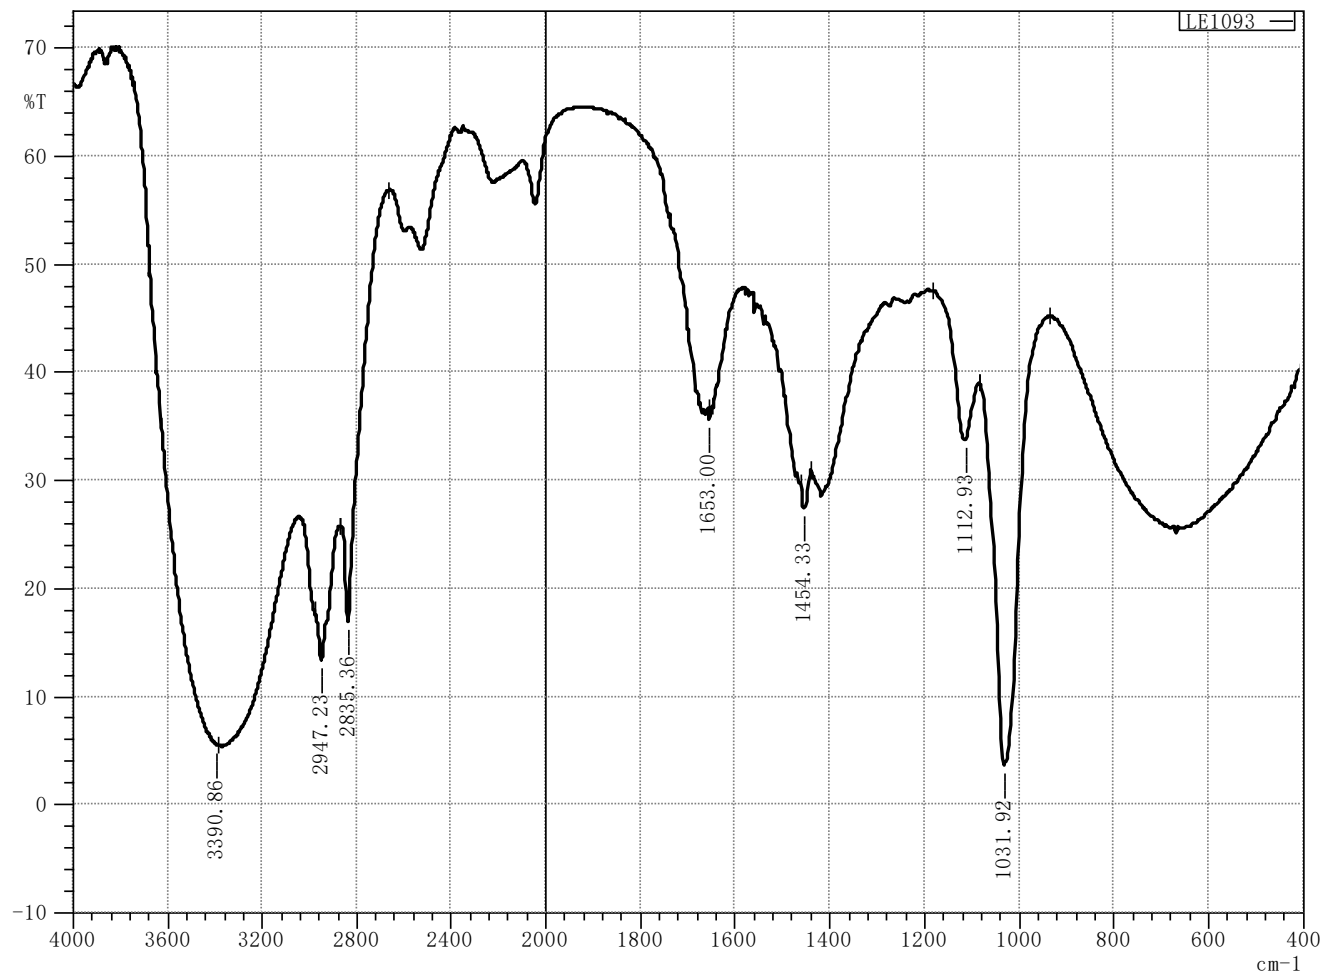

Fig. S39. IR of 4.

LE1093 #396 RT: 3.45 AV: 1 NL: 5.49E8  
T: FTMS + p ESI Full lock ms [100.0000-1000.0000]

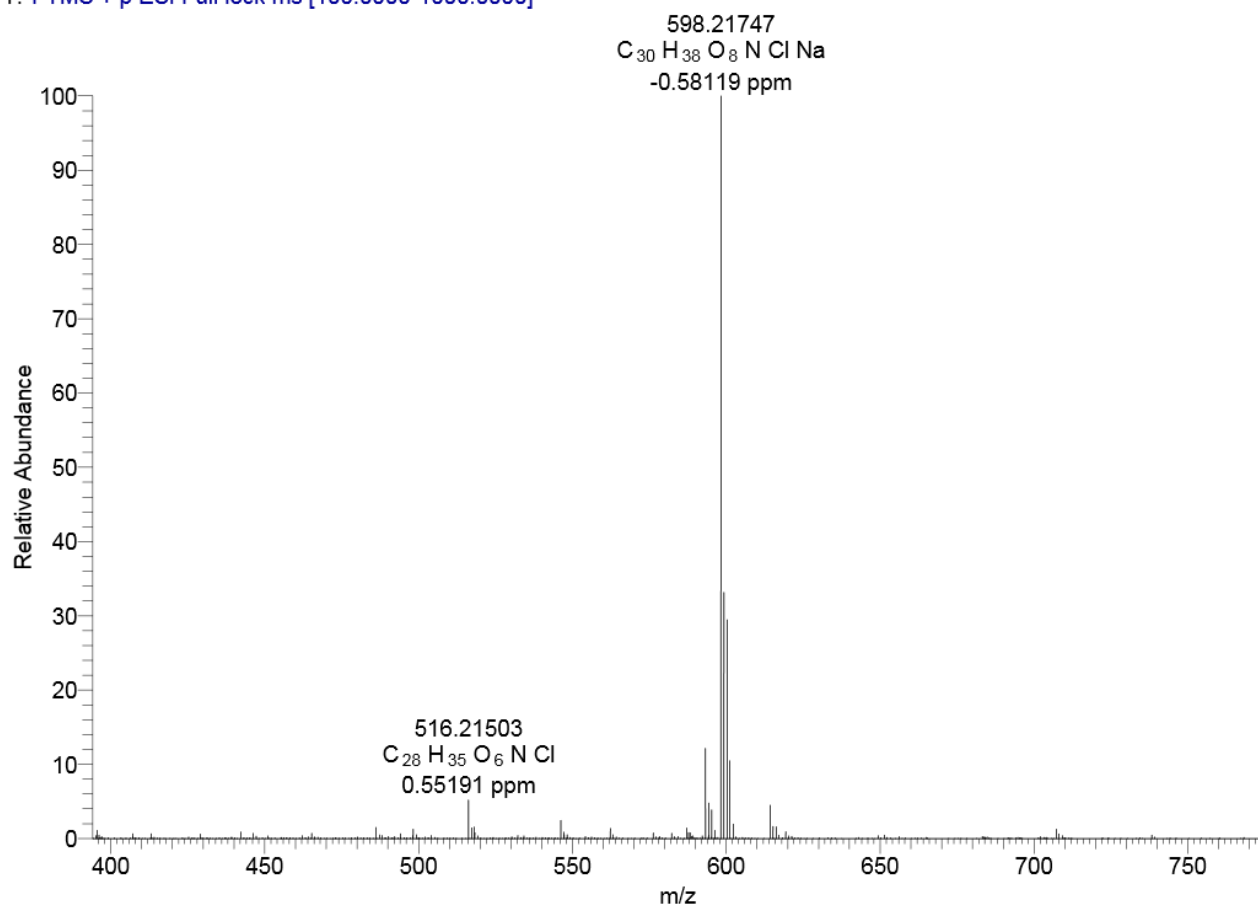

Fig. S40. HRESIMS of 4.

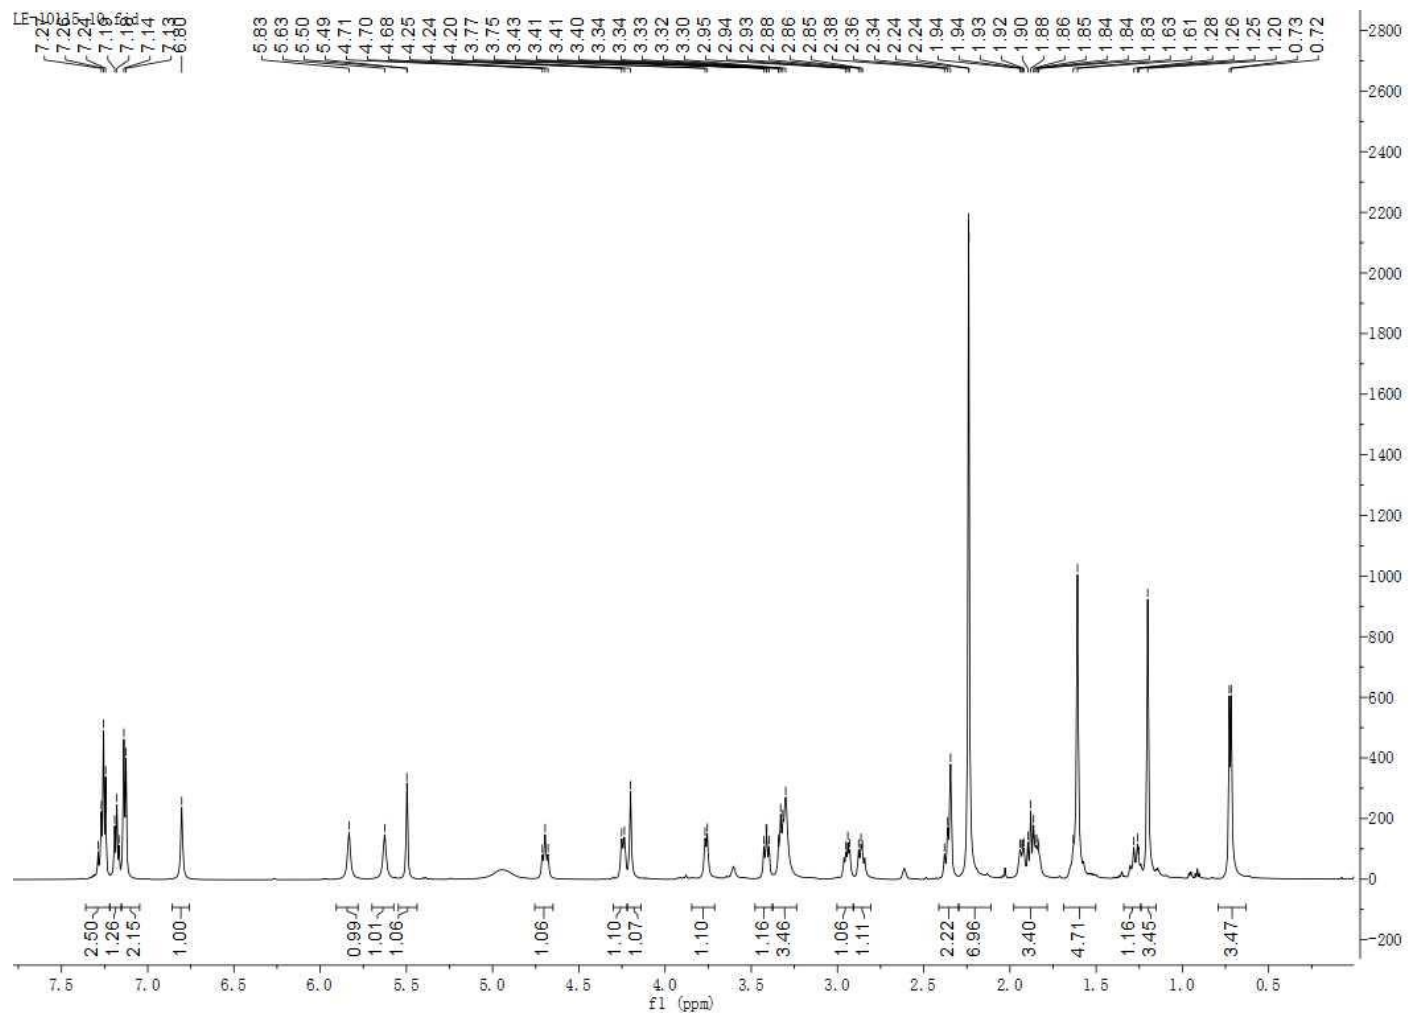

Fig. S41.  $^1\text{H}$  NMR of **5** ( $\text{CDCl}_3$ , 600 MHz).

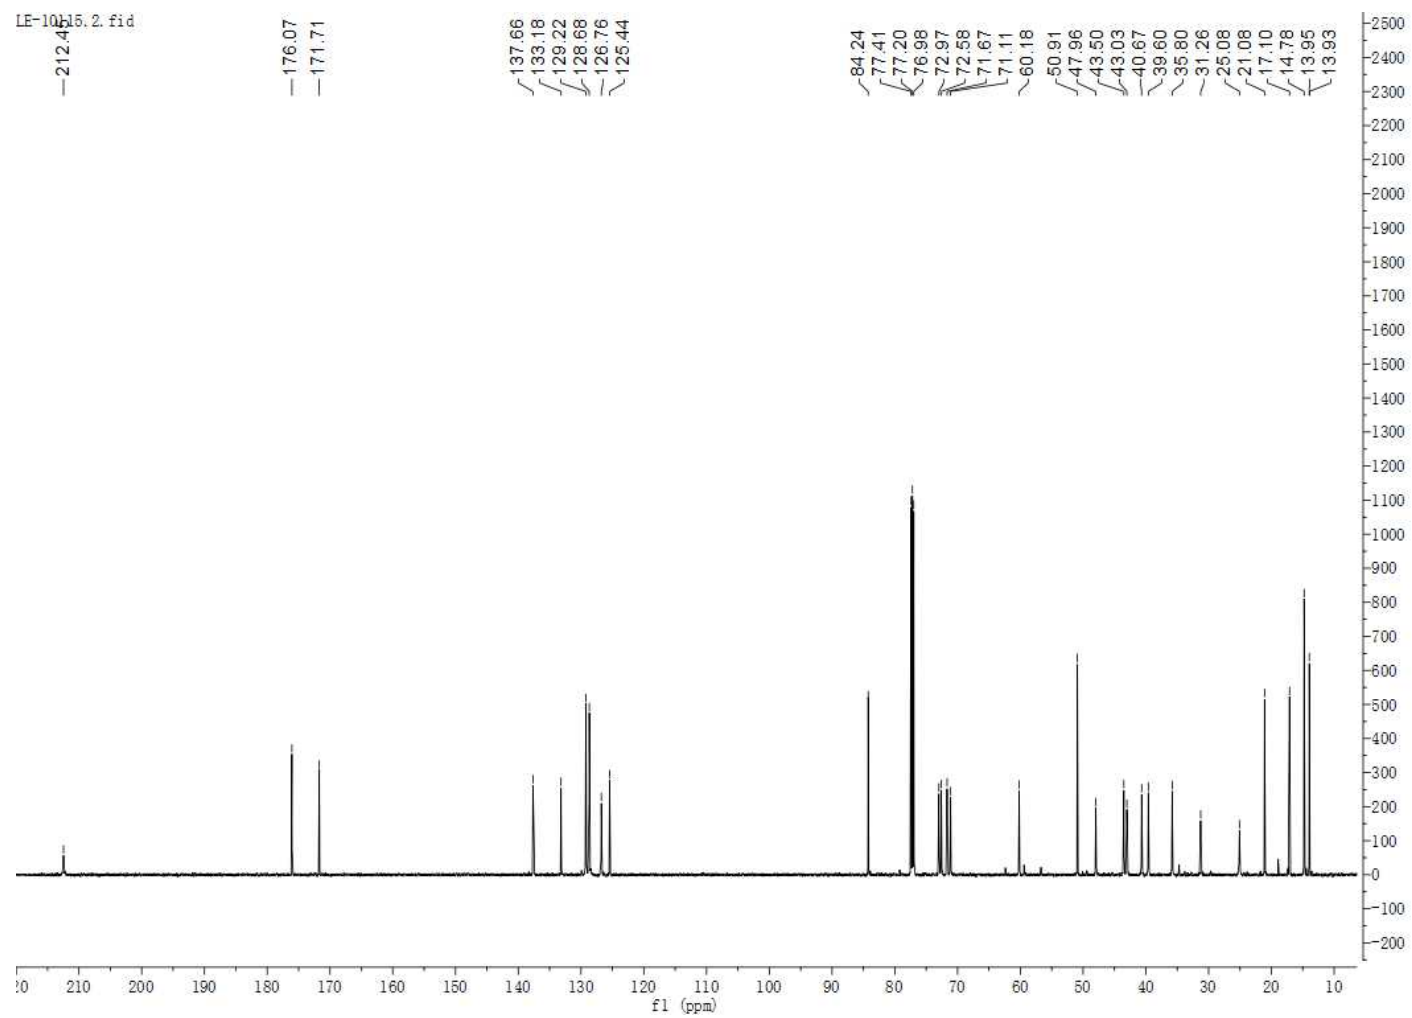

**Fig. S42.**  $^{13}\text{C}$  NMR of **5** ( $\text{CDCl}_3$ , 150 MHz).



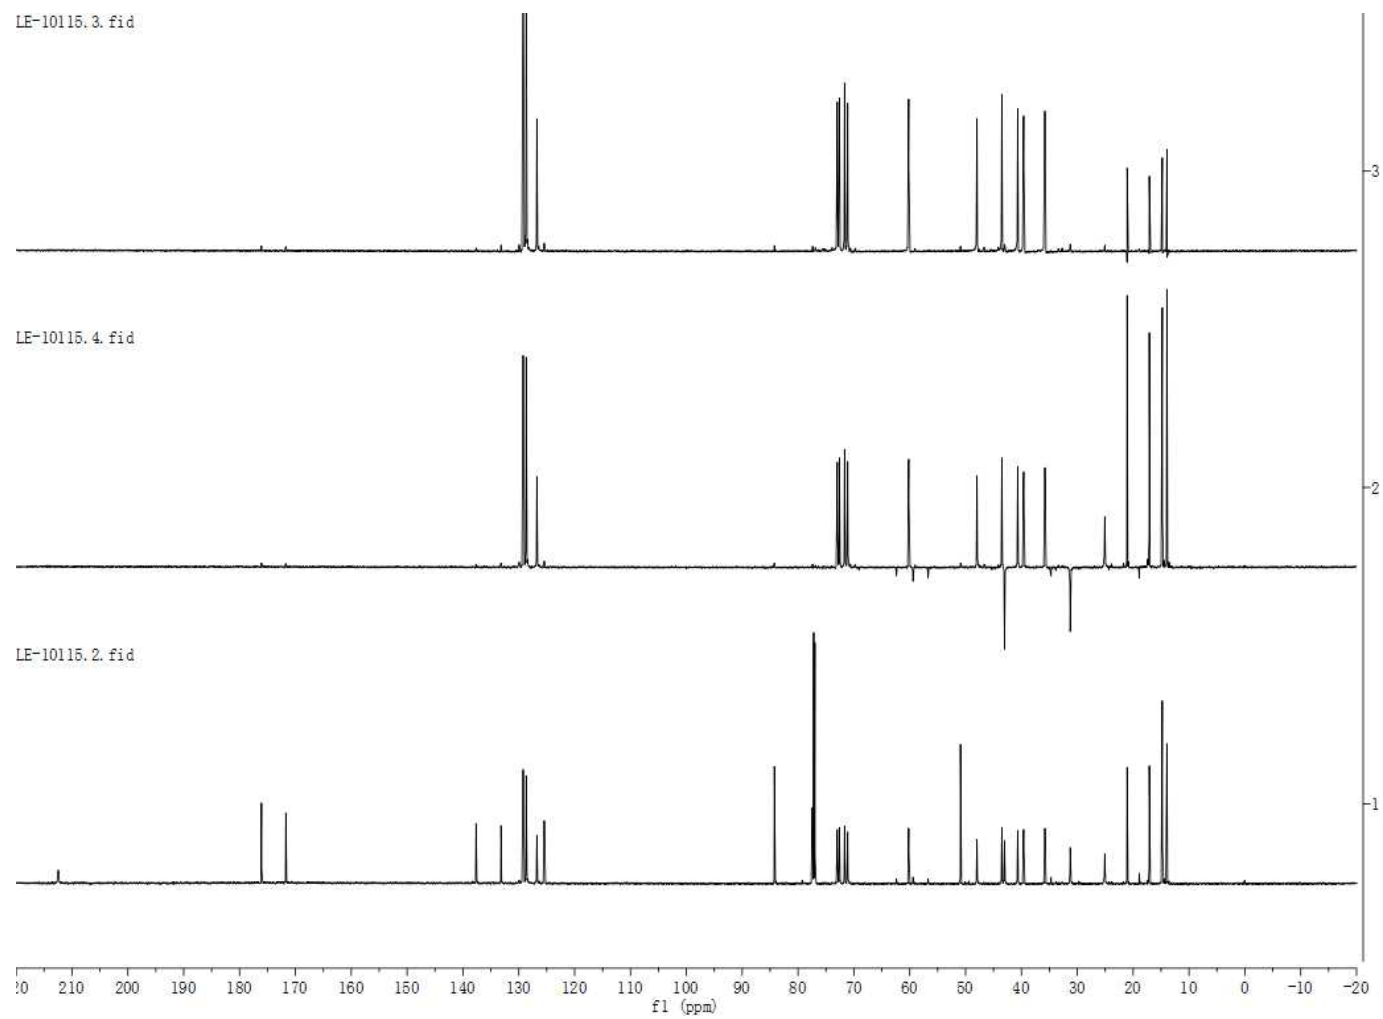

**Fig. S43.** DEPT of 5.

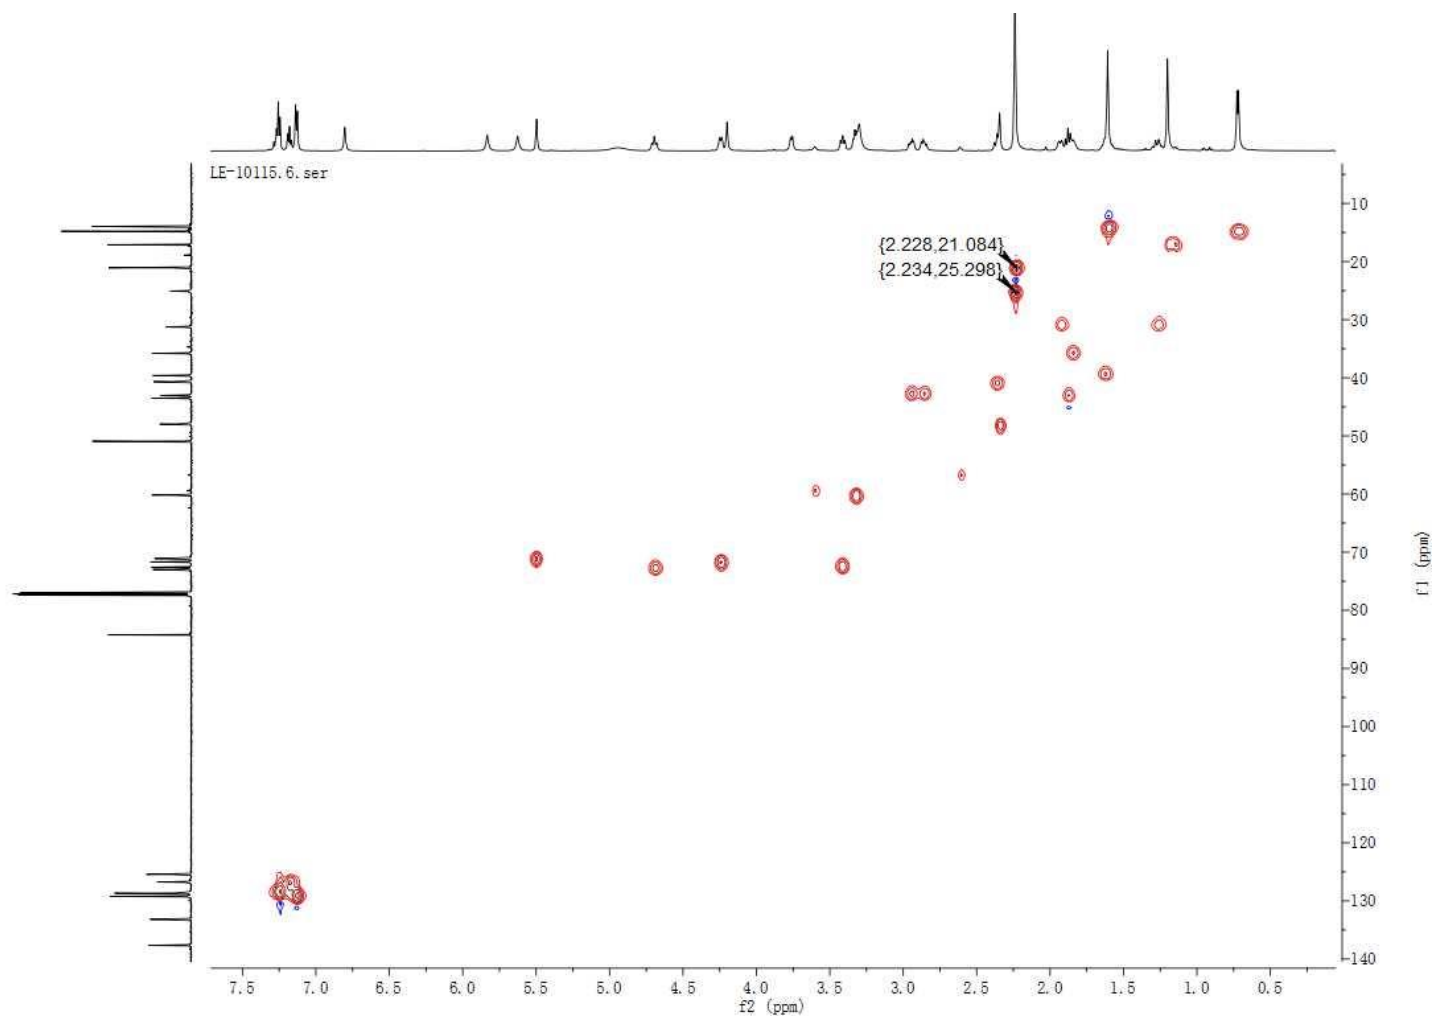

Fig. S44. HSQC of 5.

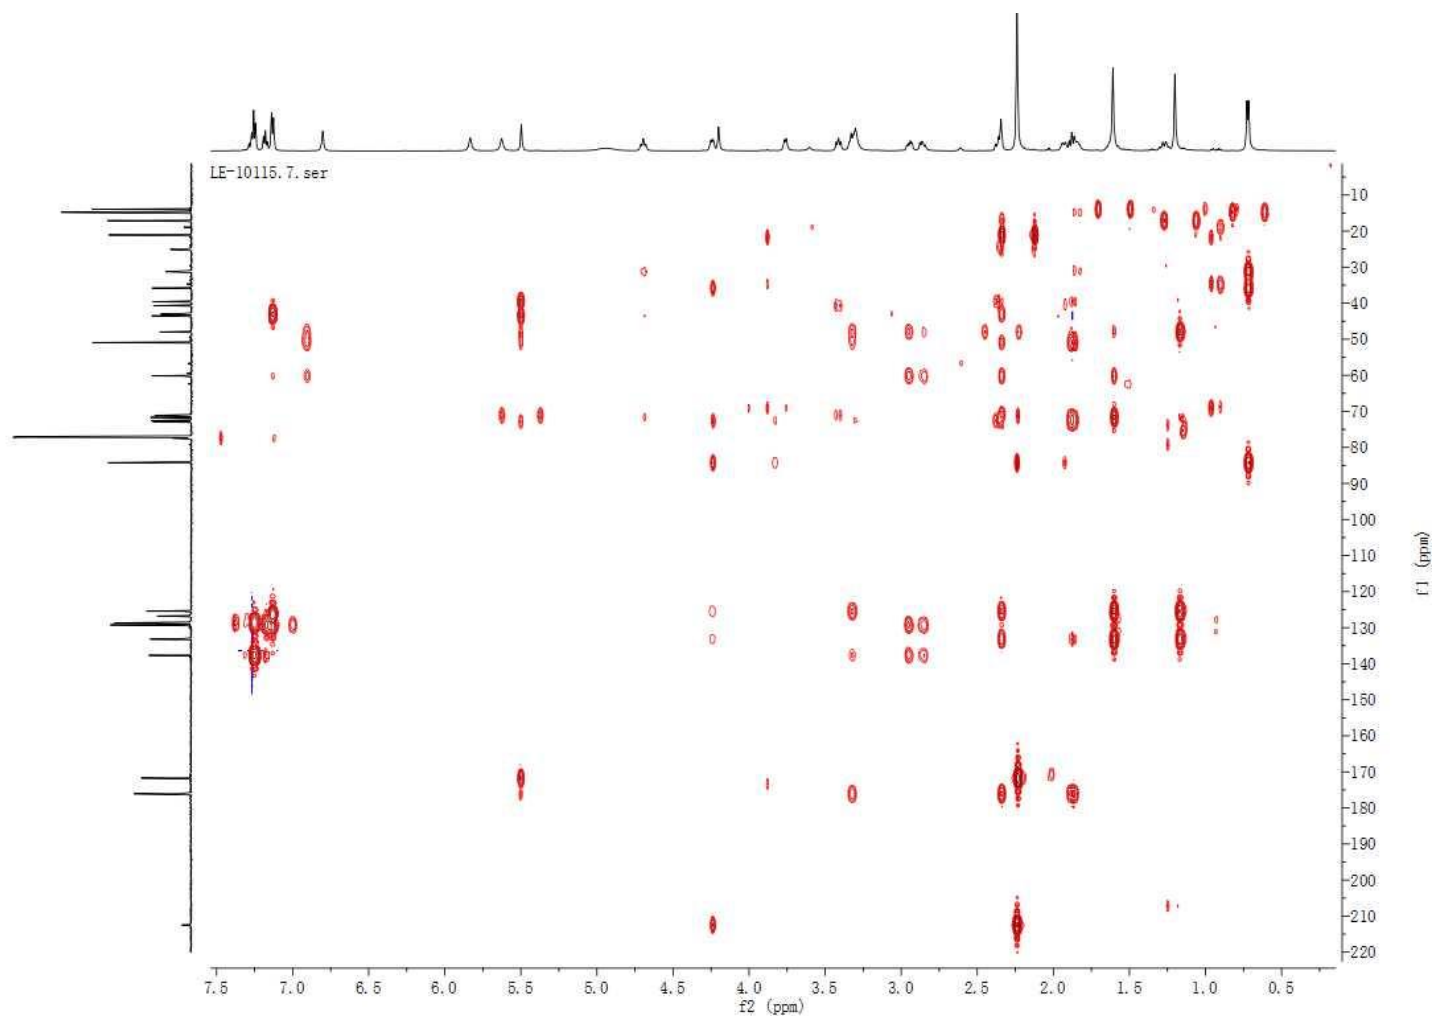

Fig. S45. HMBC of 5.

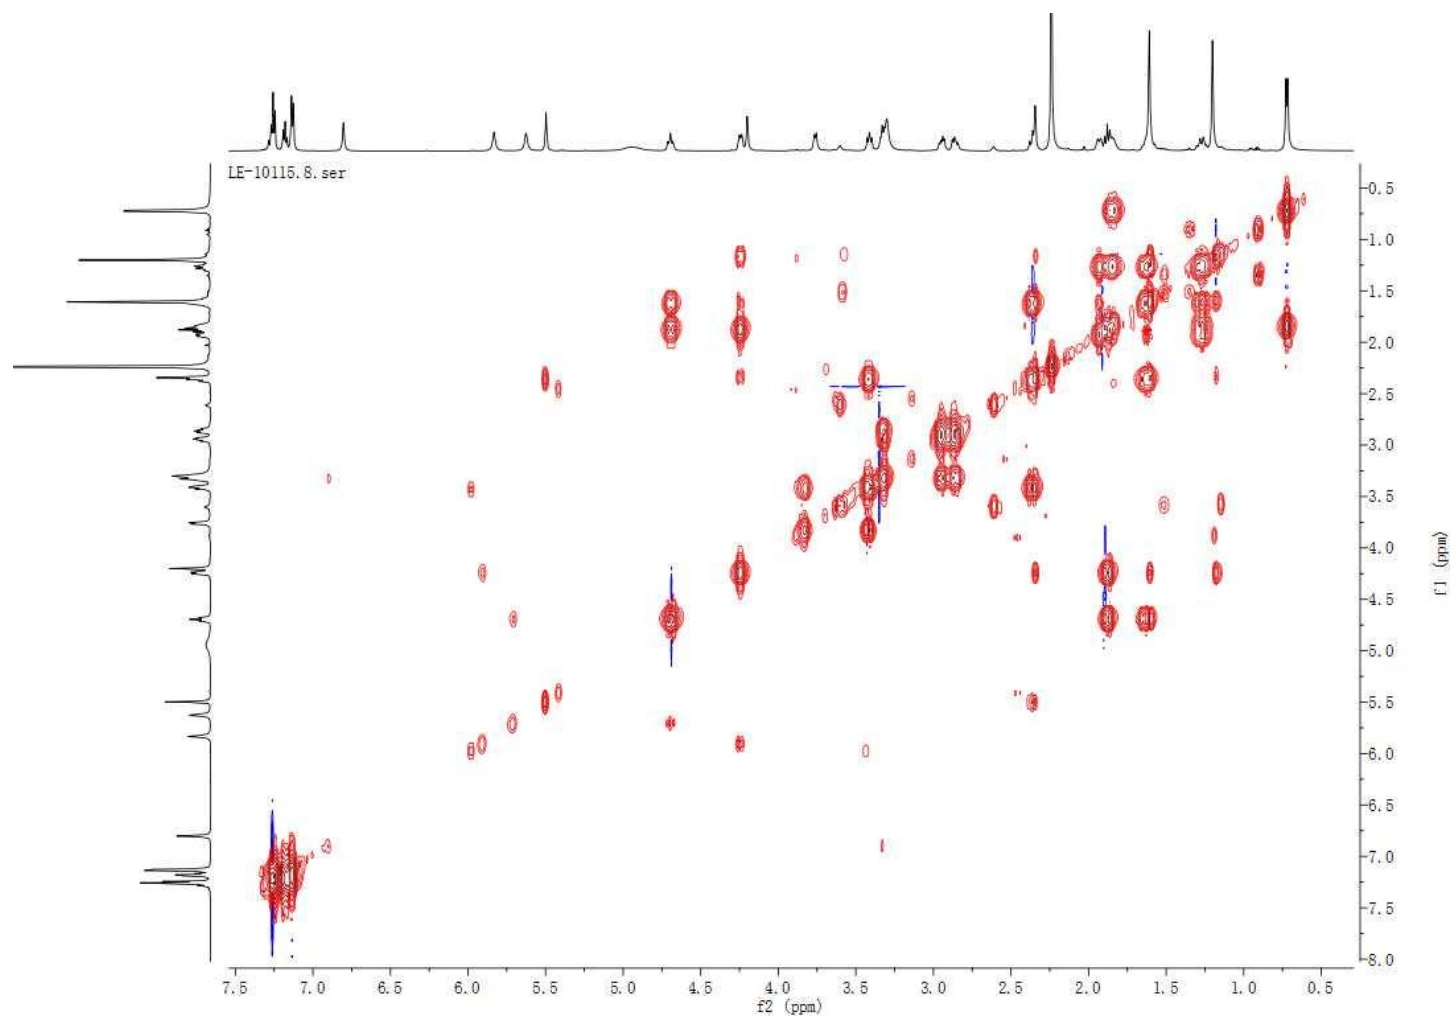

Fig. S46.  $^1\text{H}$ - $^1\text{H}$  COSY of **5**.

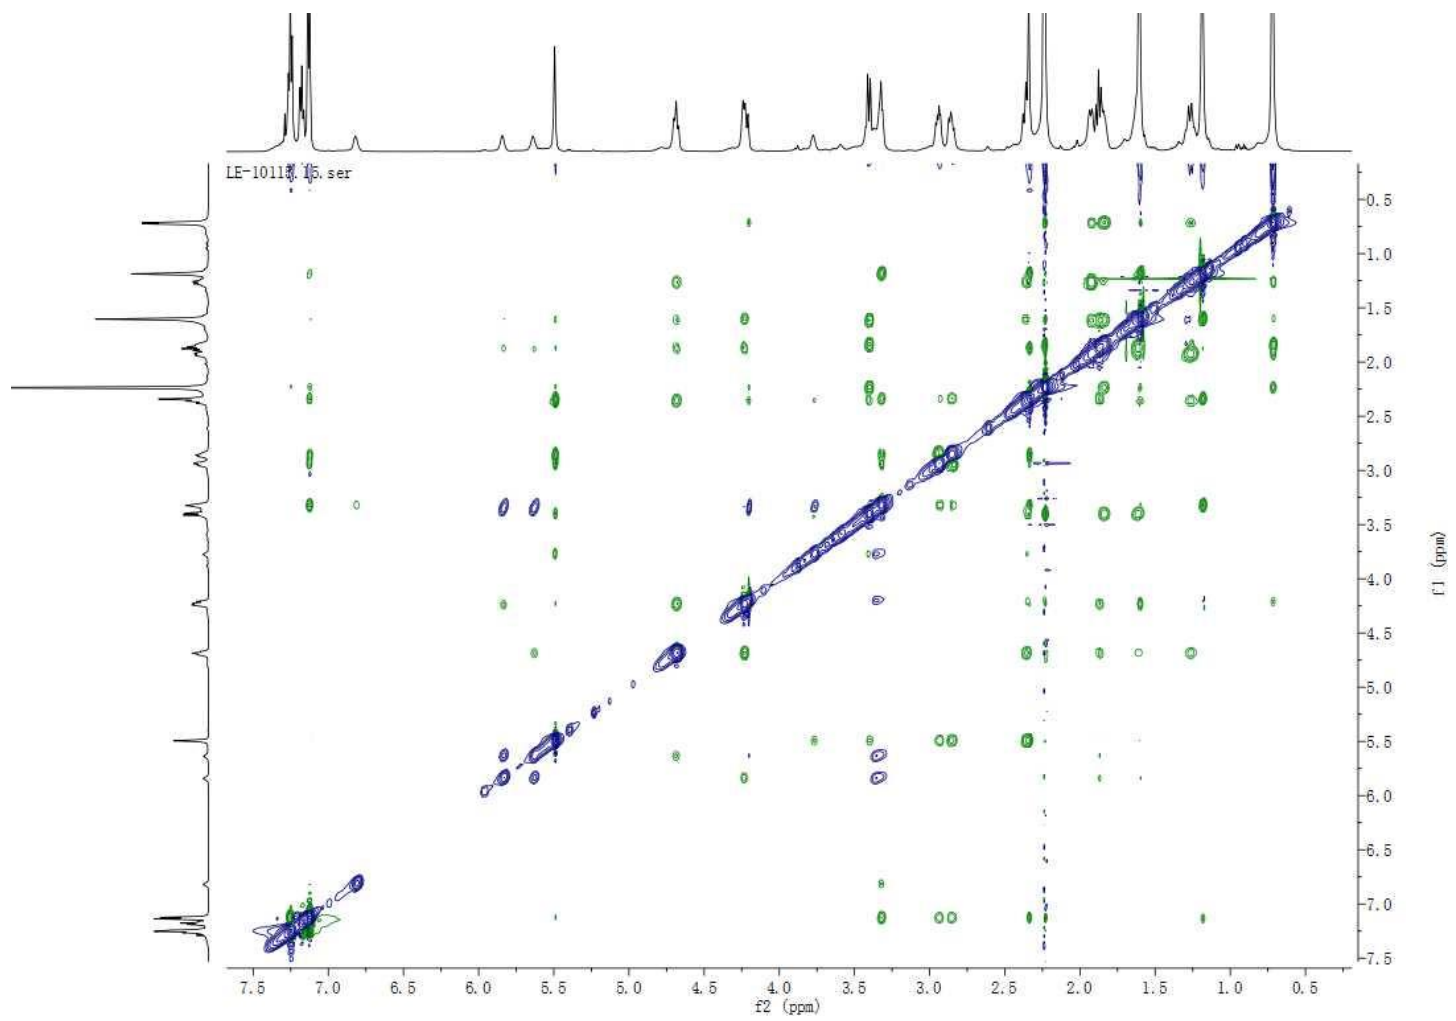

Fig. S47. ROESY of 5.

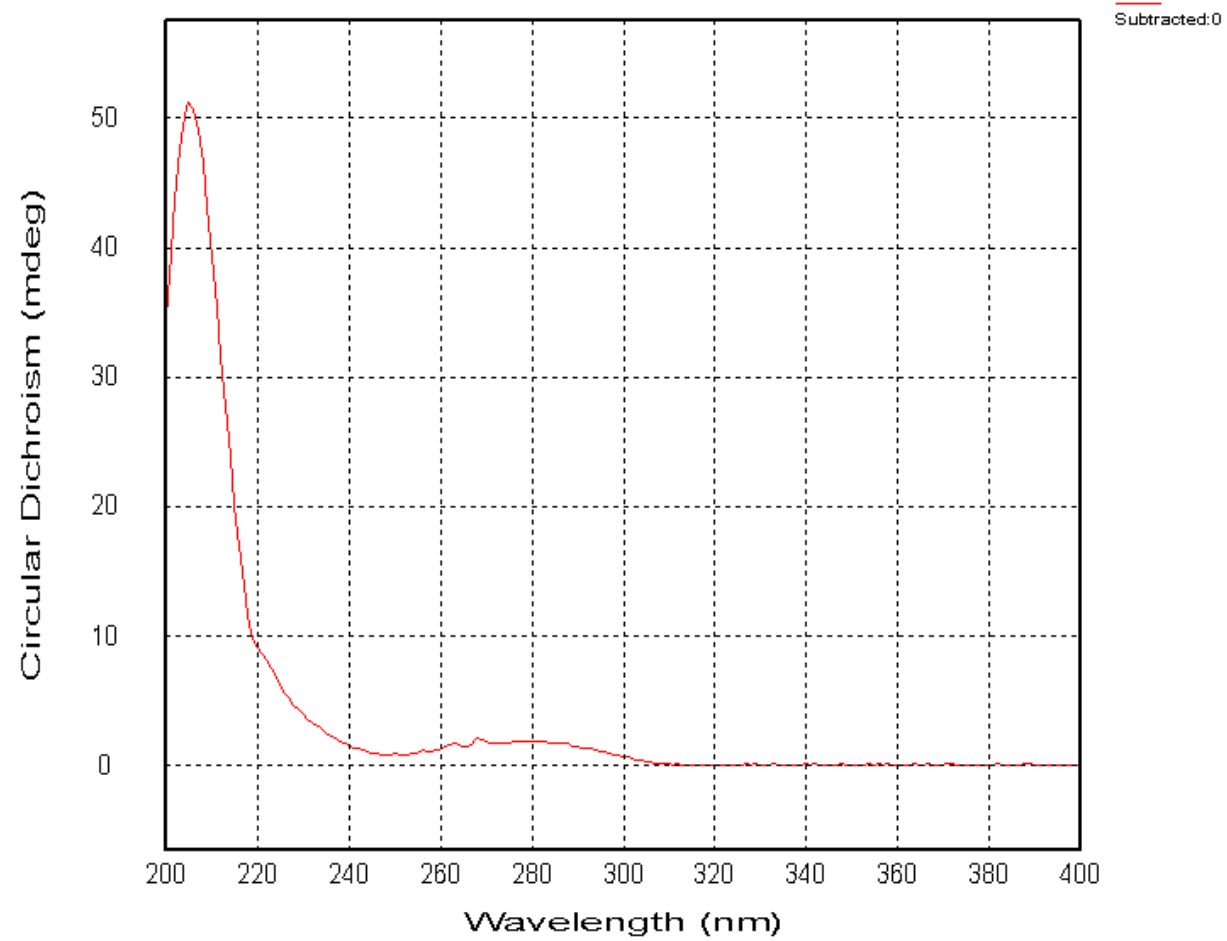

Fig. S48. Experimental ECD of 5.

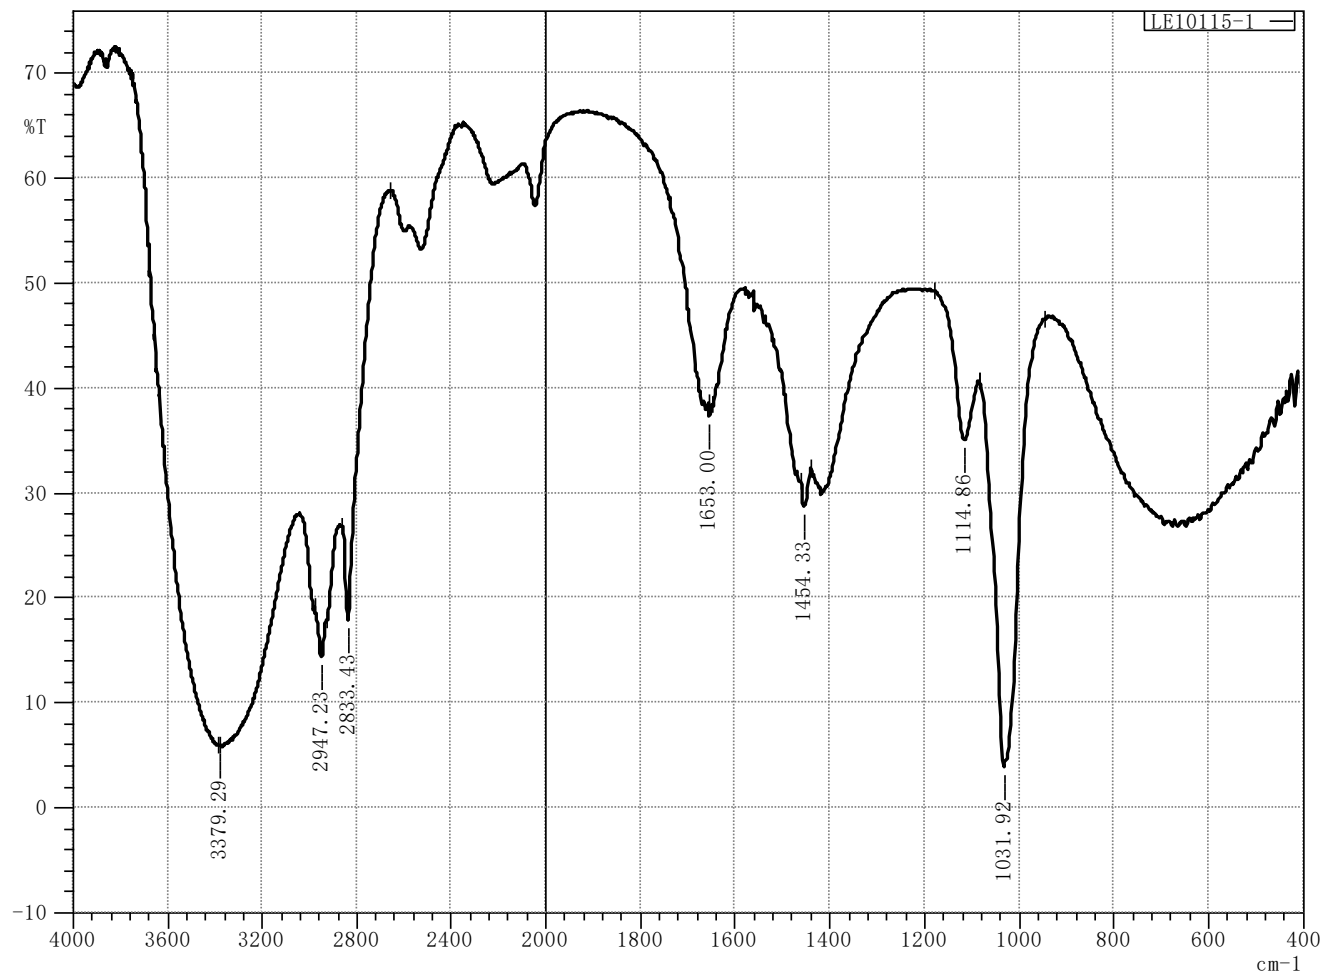

Fig. S49. IR of 5.

LE10-115 #1586 RT: 13.83 AV: 1 NL: 3.18E9  
T: FTMS + p ESI Full ms [250.0000-2000.0000]

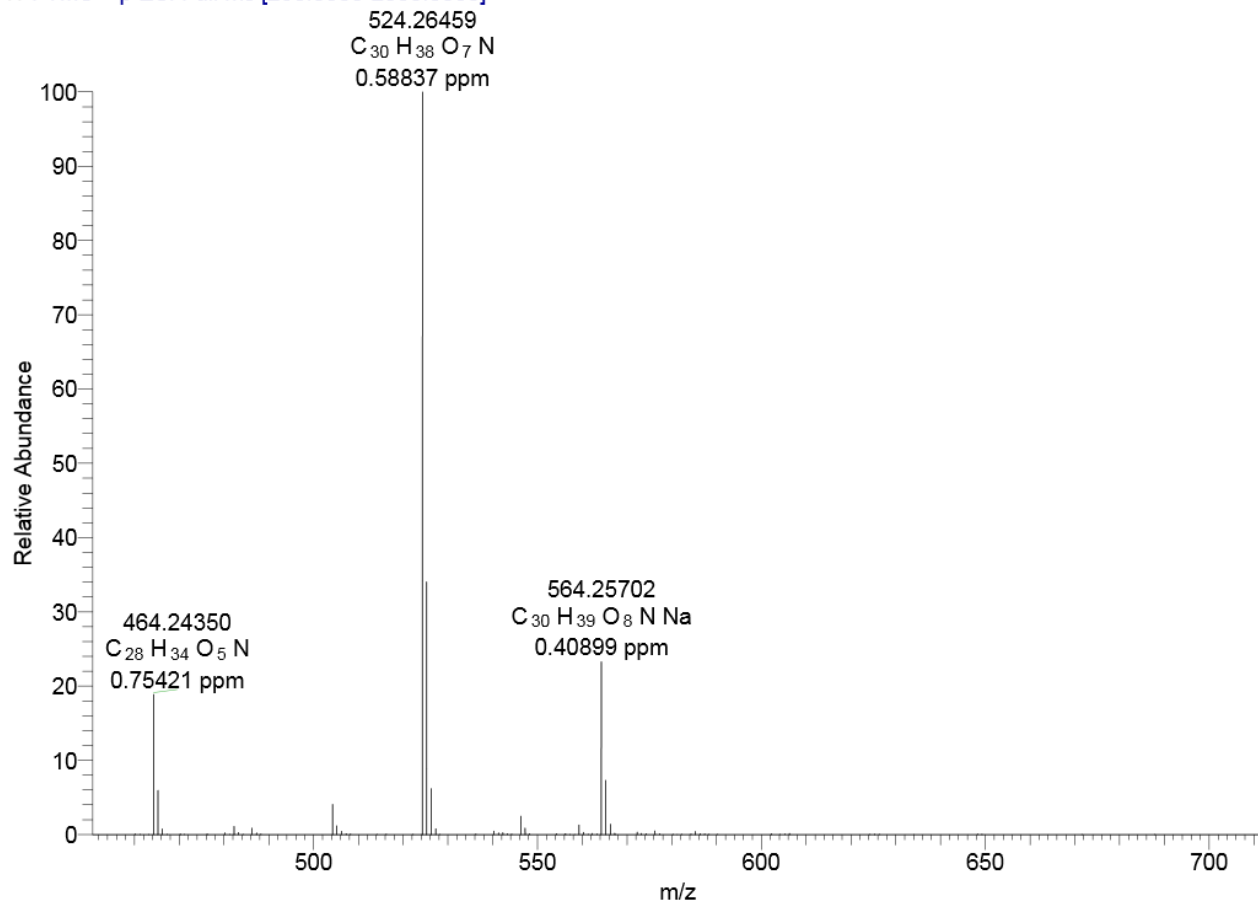

Fig. S50. HRESIMS of 5.



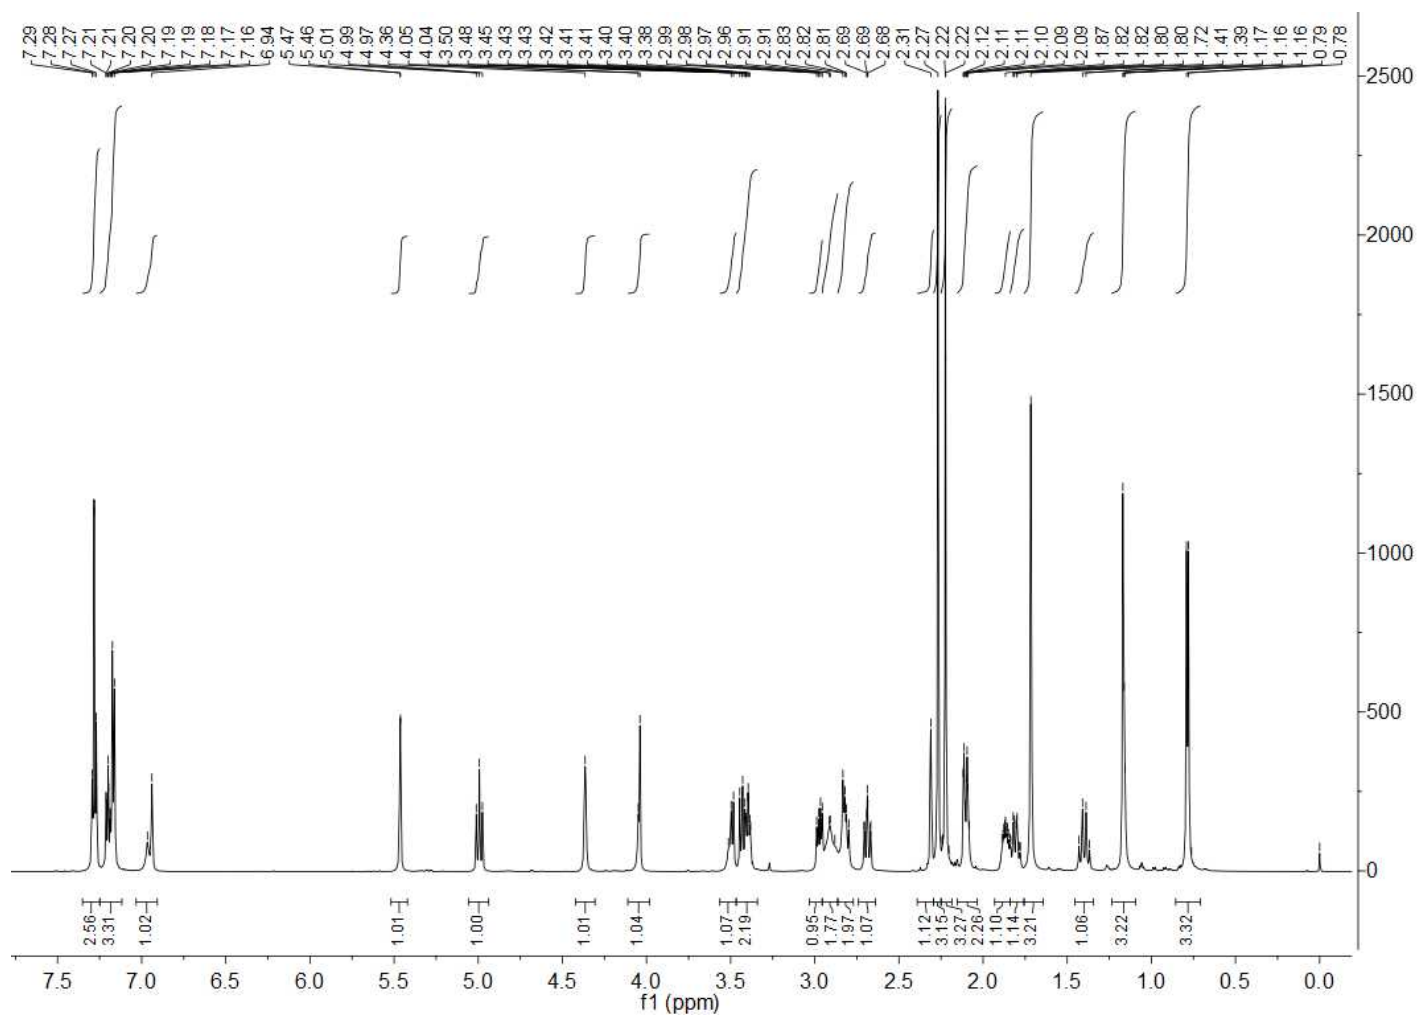

**Fig. S51.**  $^1\text{H}$  NMR of **6** ( $\text{CDCl}_3$ , 600 MHz).

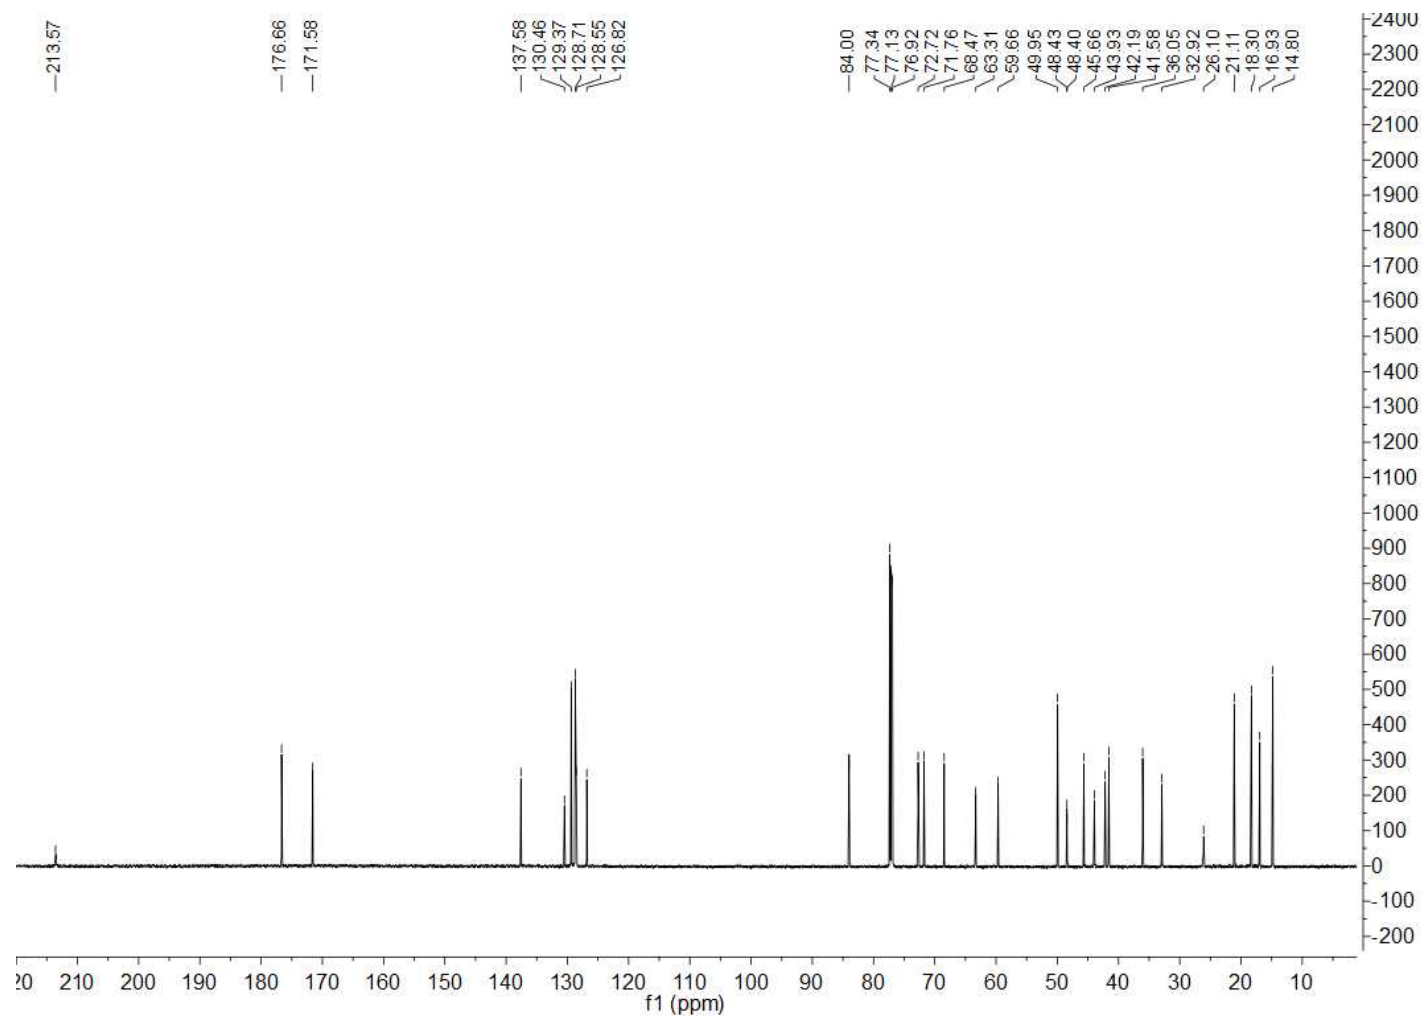

Fig. S52.  $^{13}\text{C}$  NMR of **6** ( $\text{CDCl}_3$ , 150 MHz).

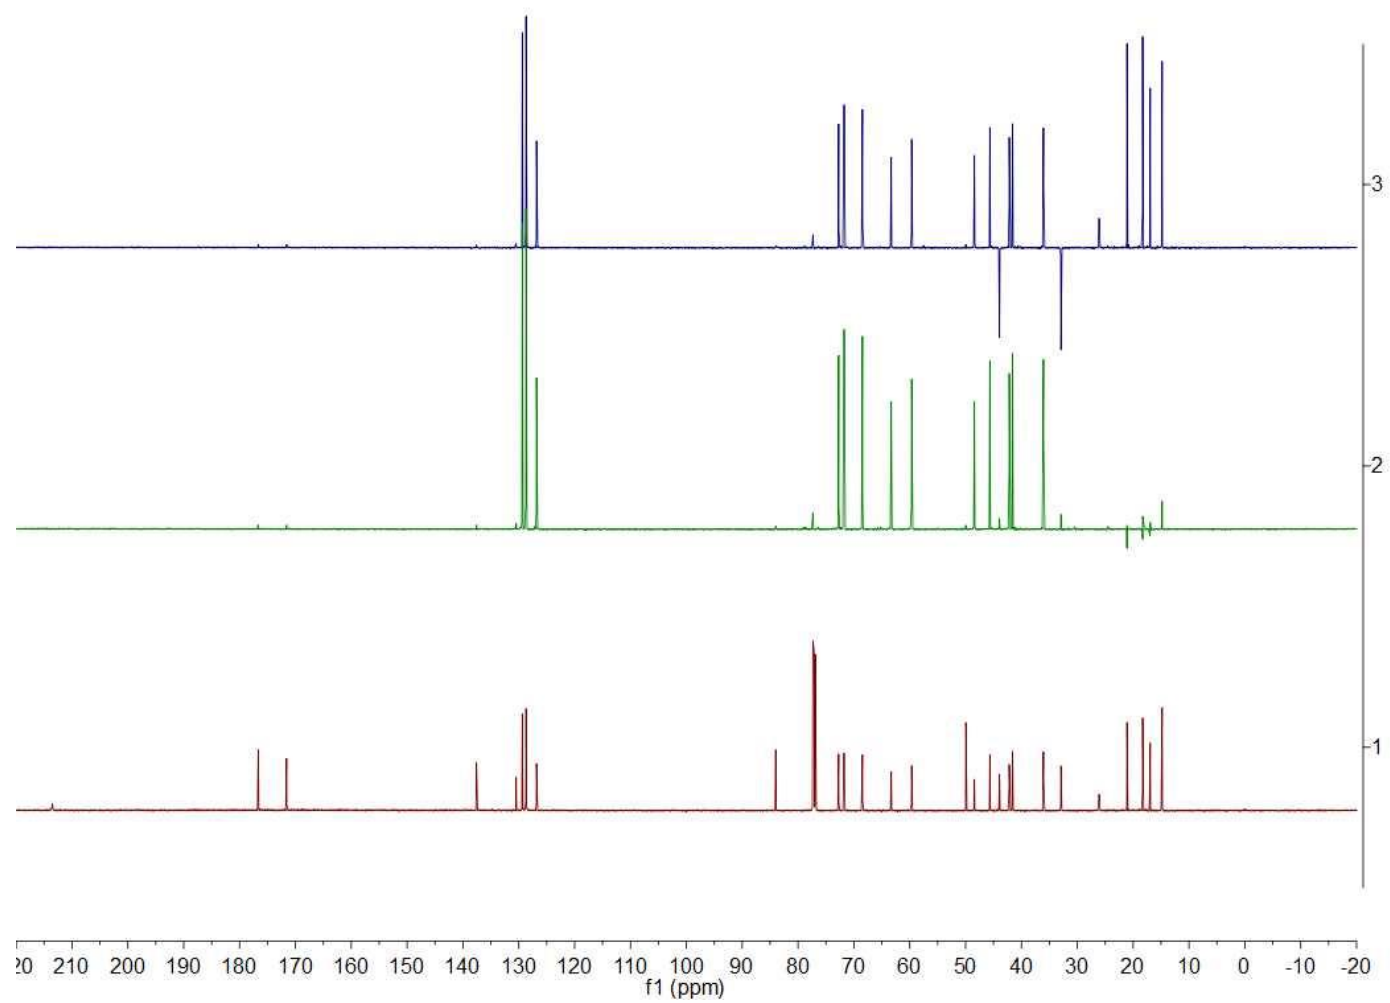

**Fig. S53.** DEPT of 6.

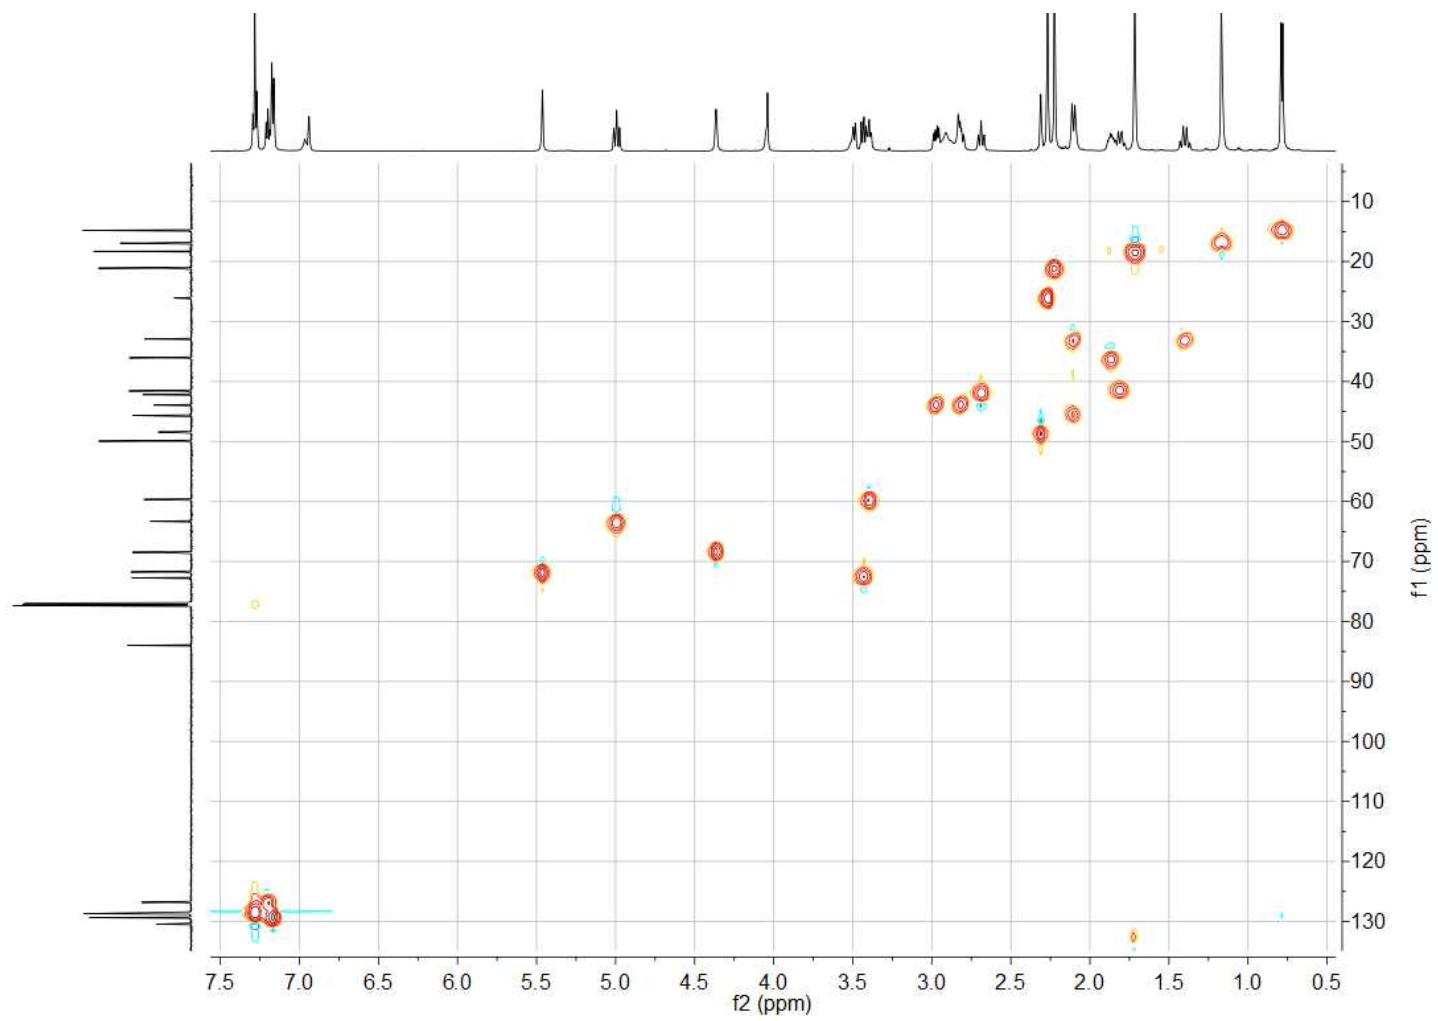

Fig. S54. HSQC of 6.

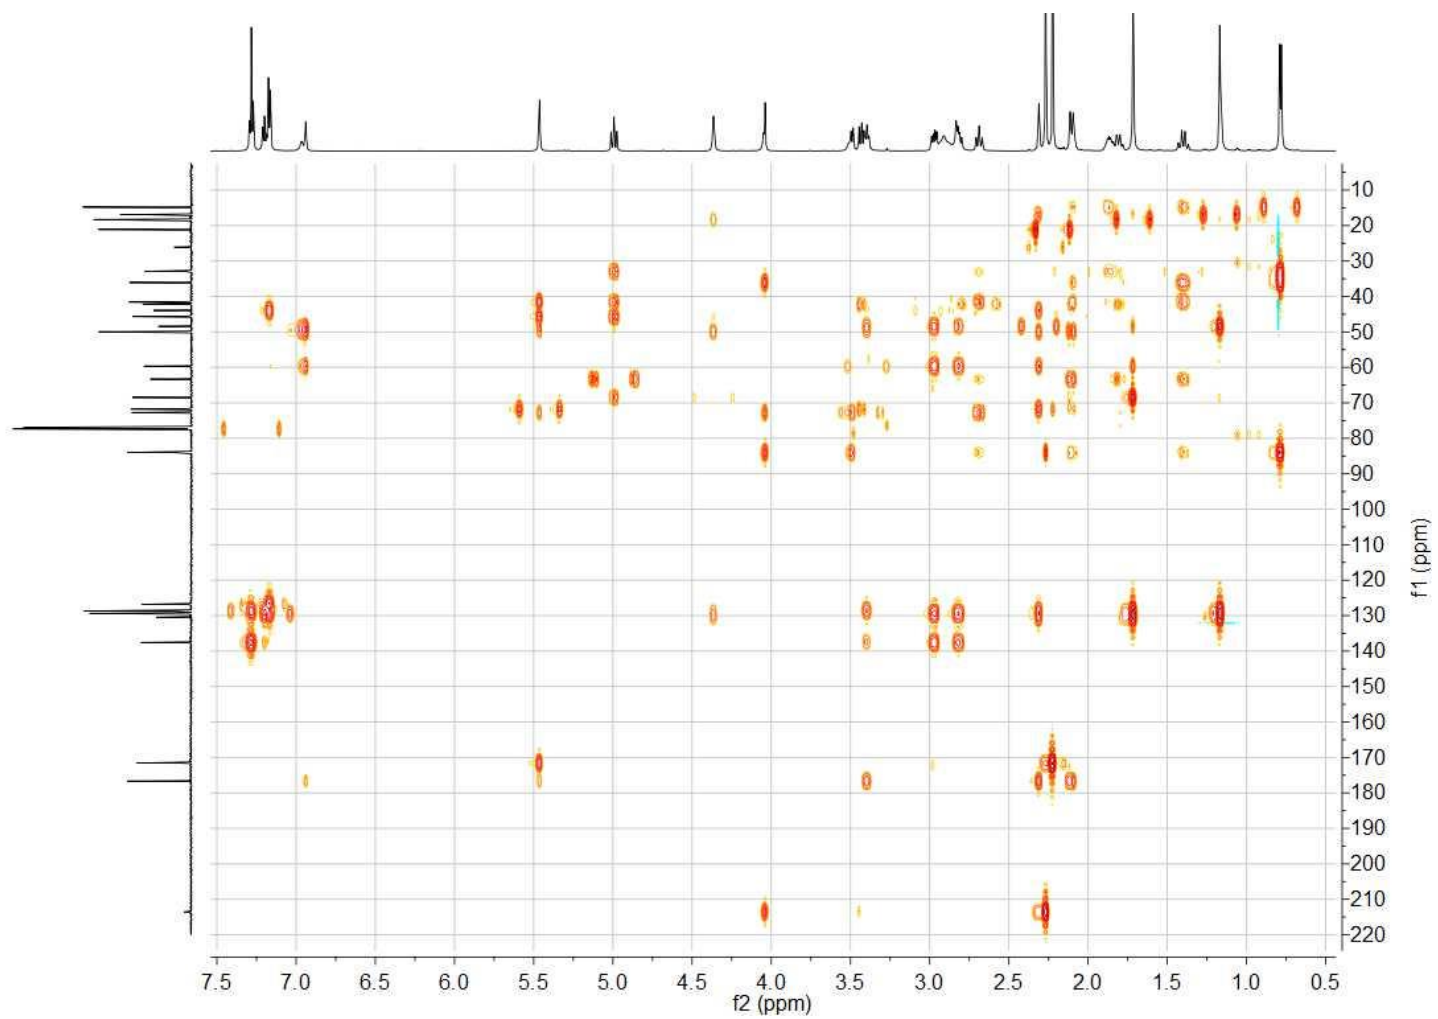

Fig. S55. HMBC of 6.

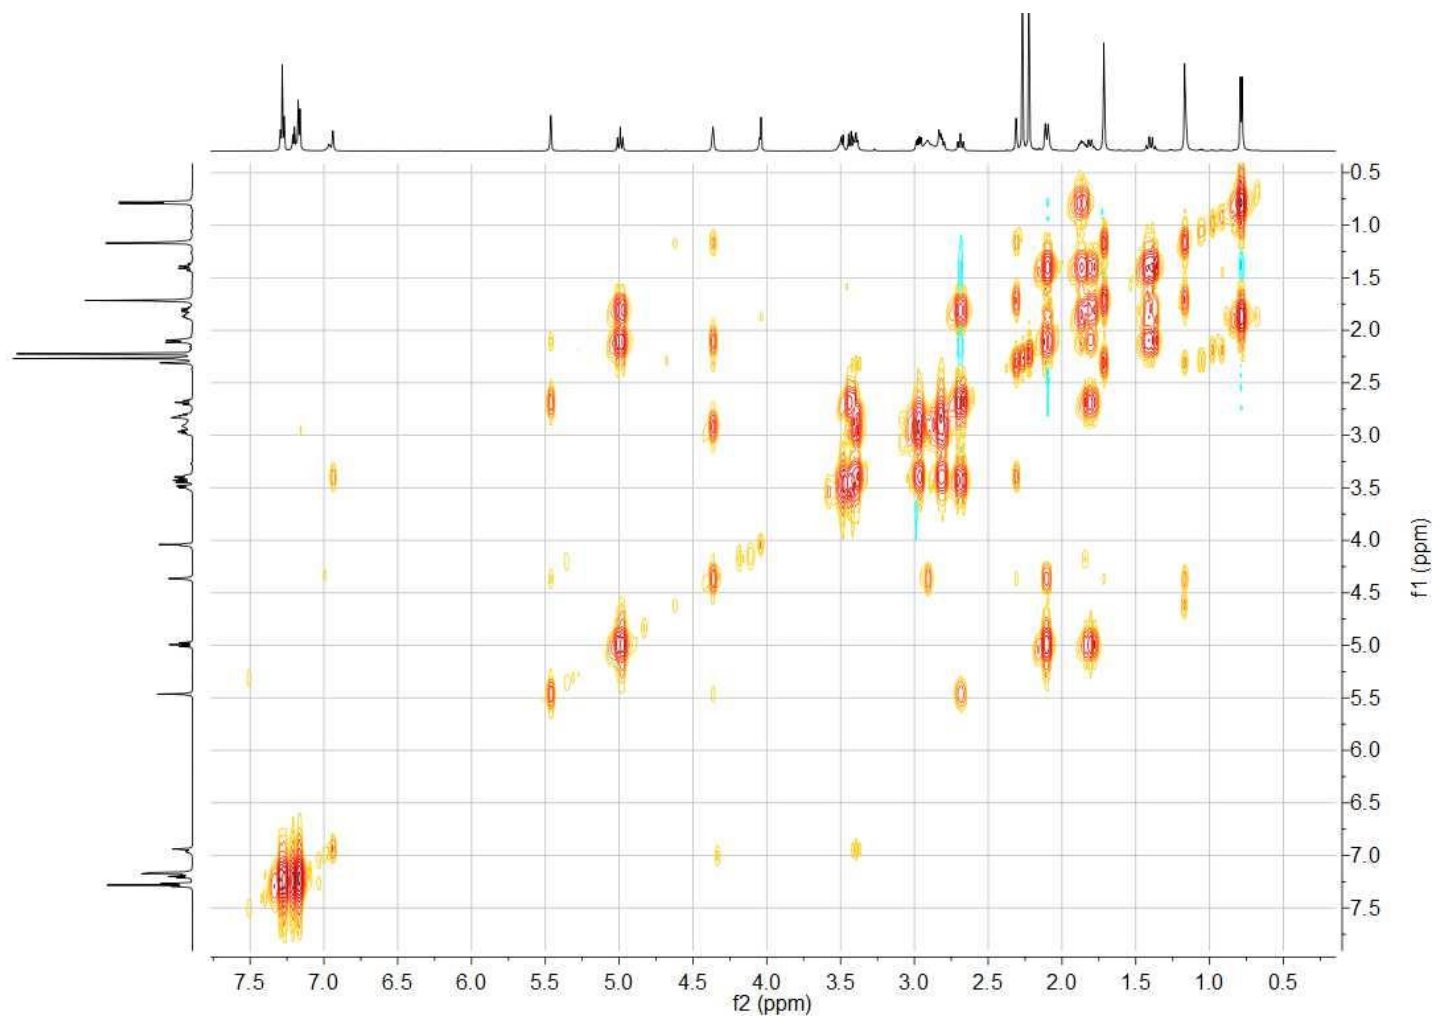

Fig. S56.  $^1\text{H}$ - $^1\text{H}$  COSY of 6.

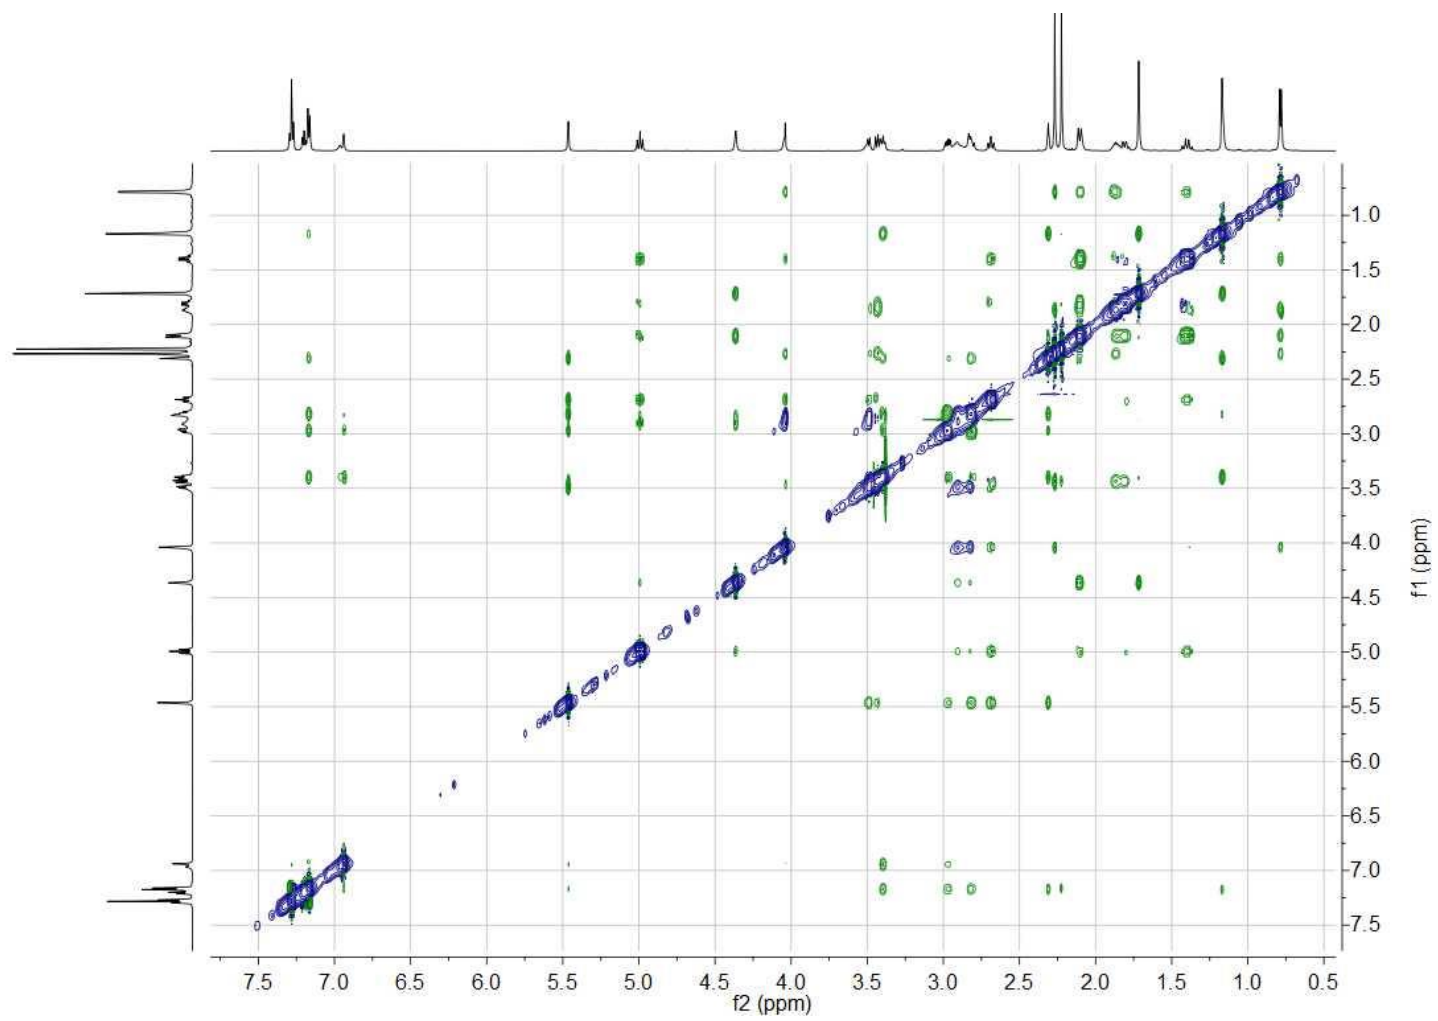

Fig. S57. ROESY of 6.

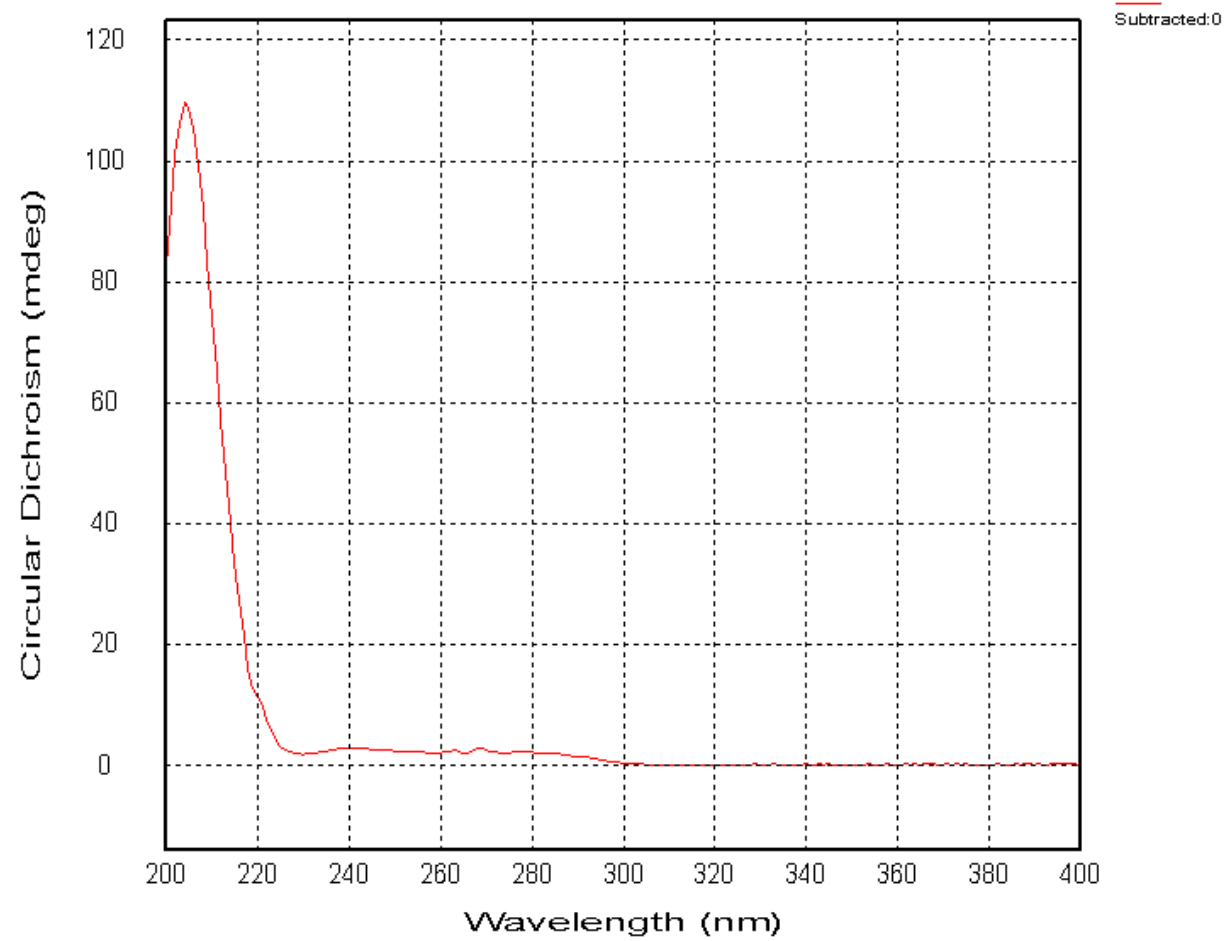

Fig. S58. Experimental ECD of 6.



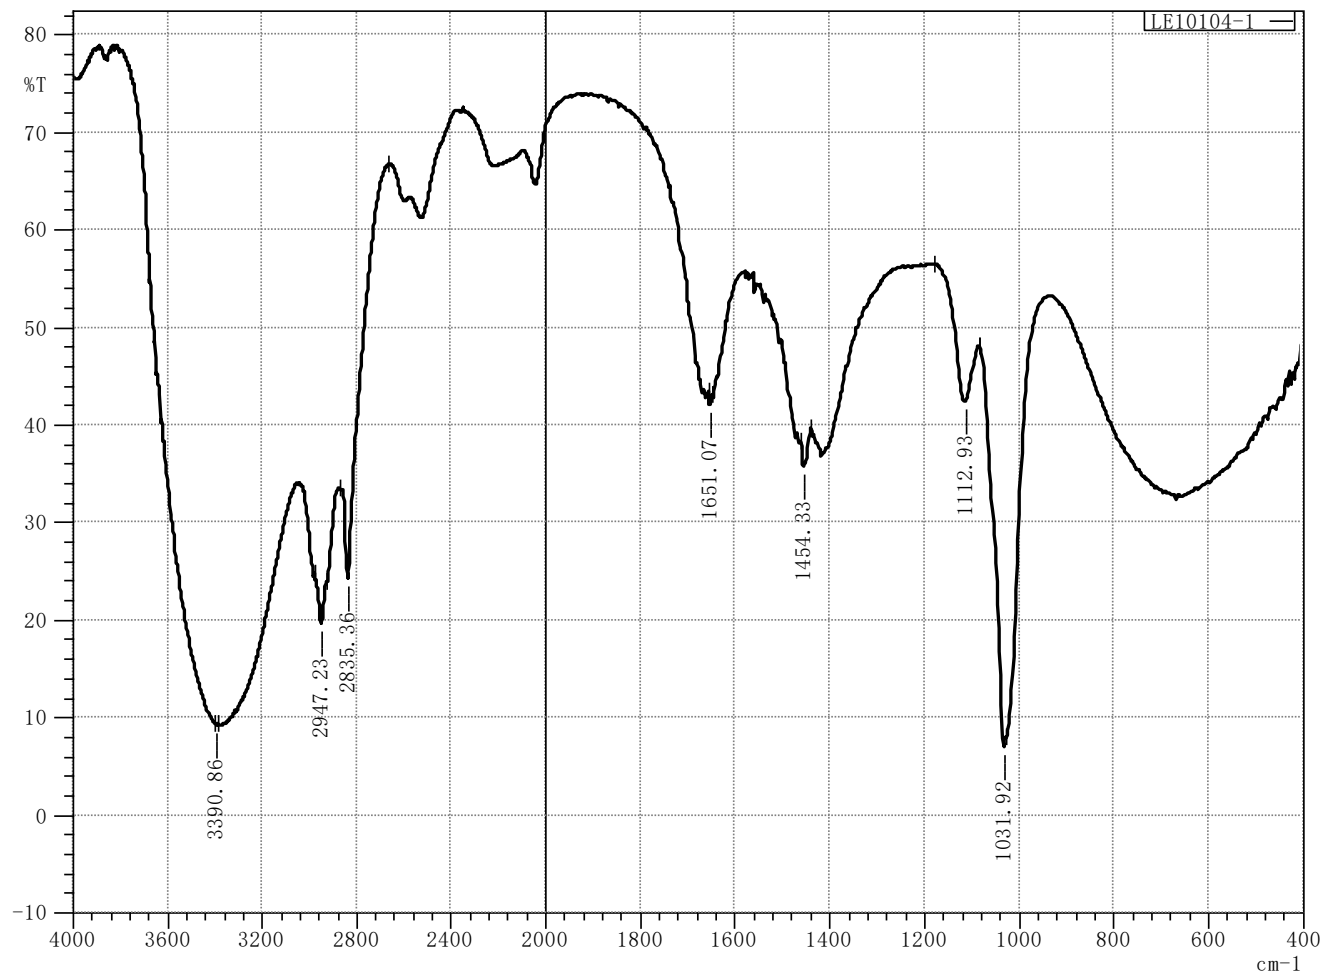

Fig. S59. IR of 6.

E106R324 #992 RT: 13.82 AV: 1 NL: 1.93E8  
T: FTMS + p ESI Full ms [200.0000-2000.0000]

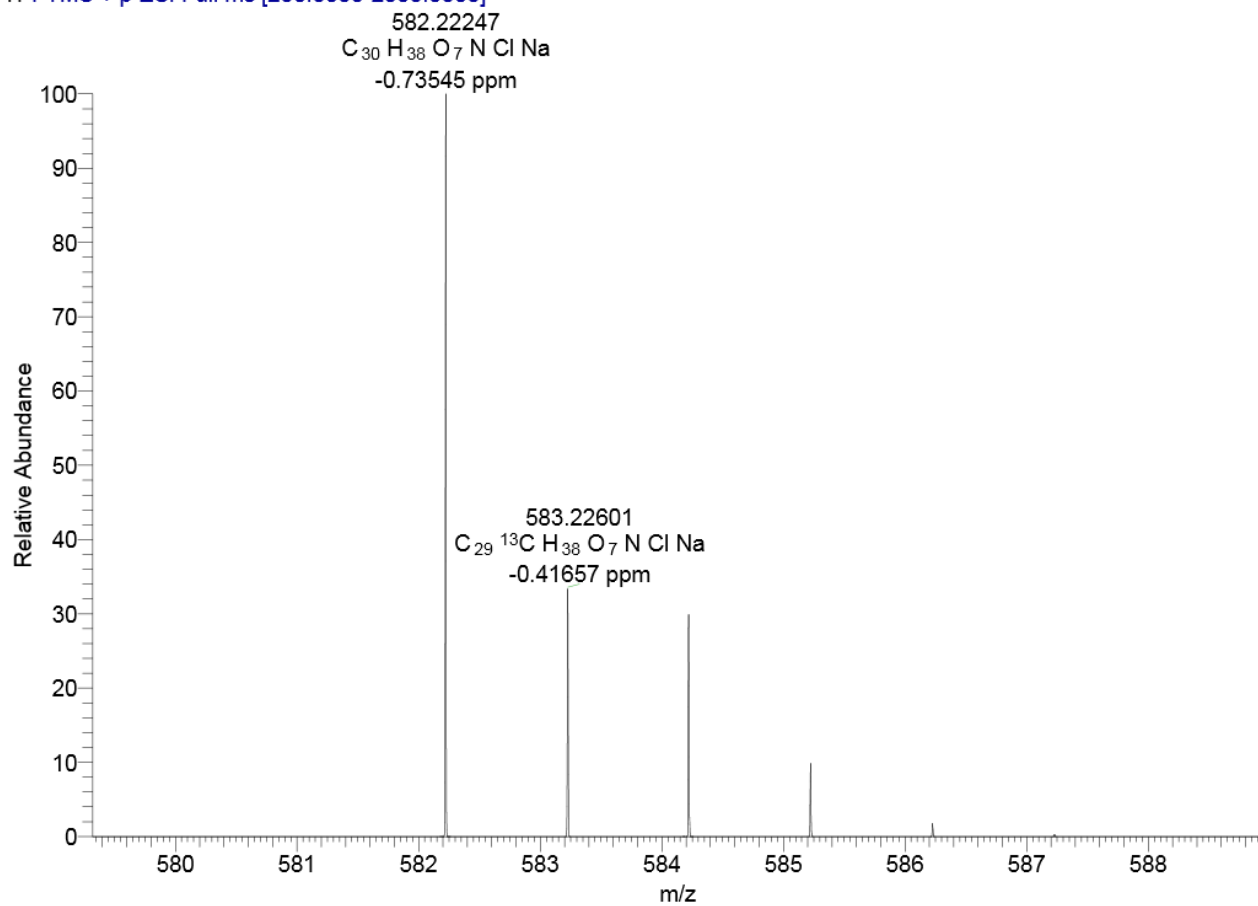

Fig. S60. HRESIMS of 6.

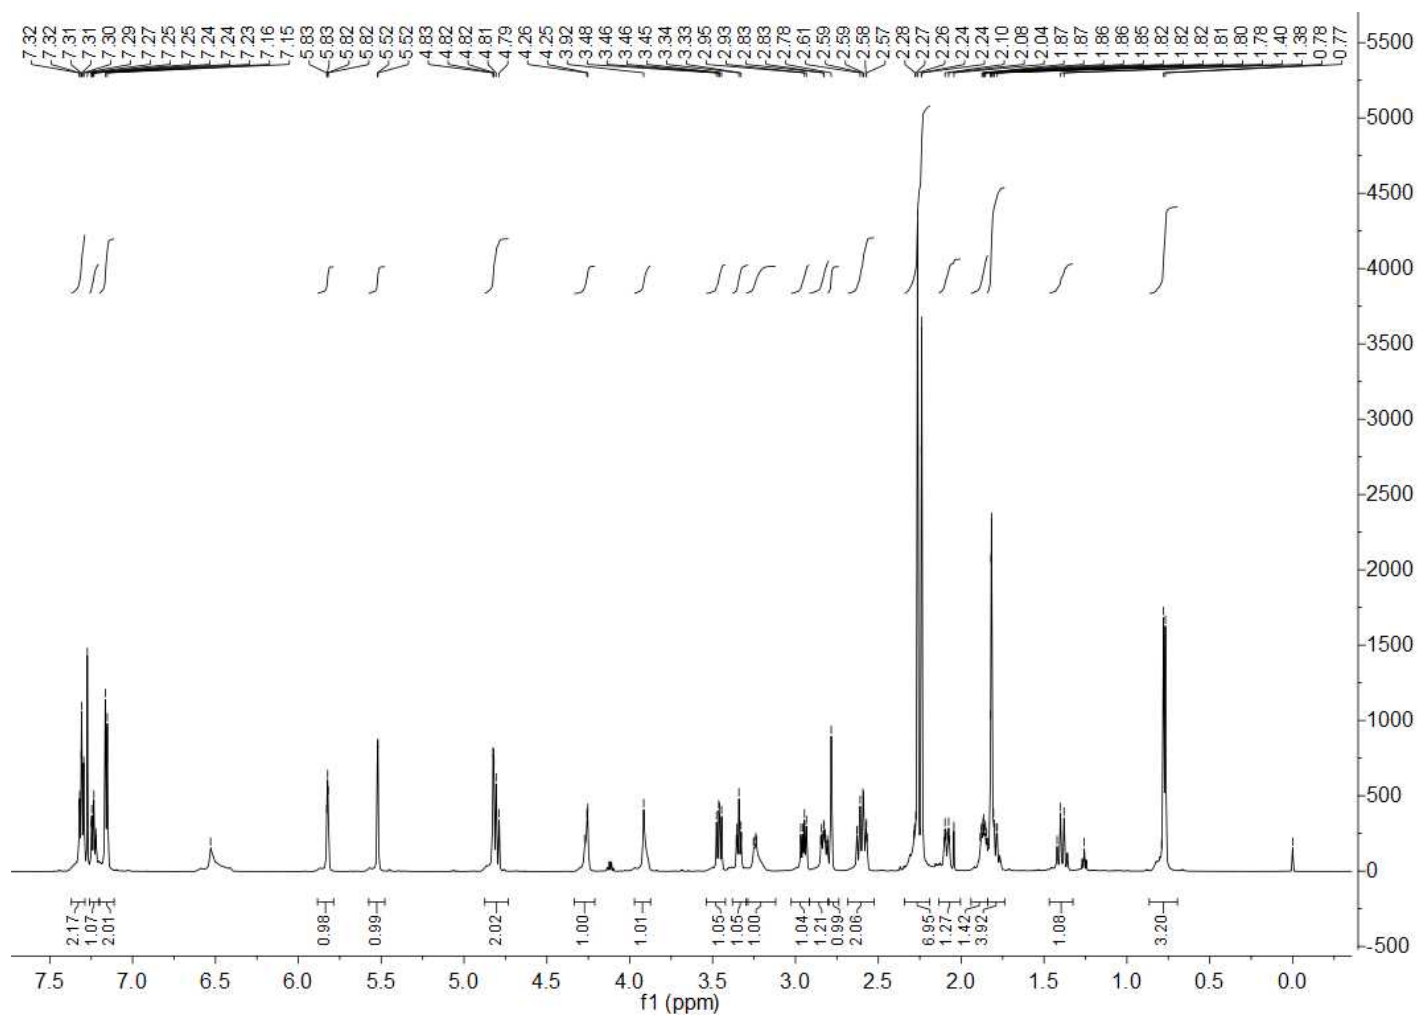

Fig. S61. <sup>1</sup>H NMR of 7.

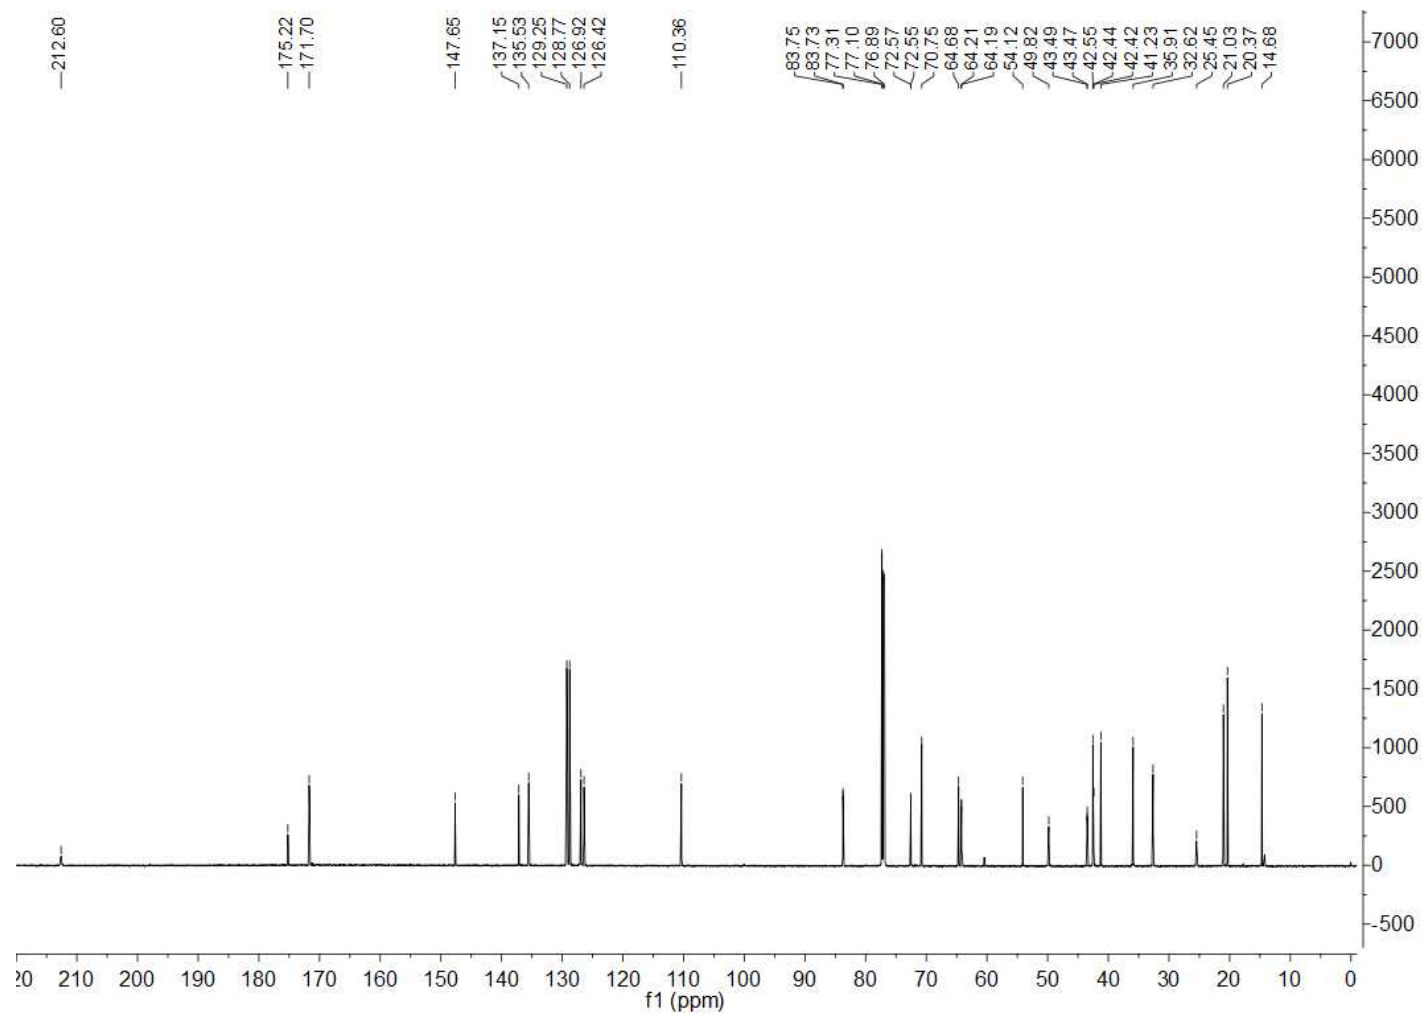

Fig. S62.  $^{13}\text{C}$  NMR of 7.

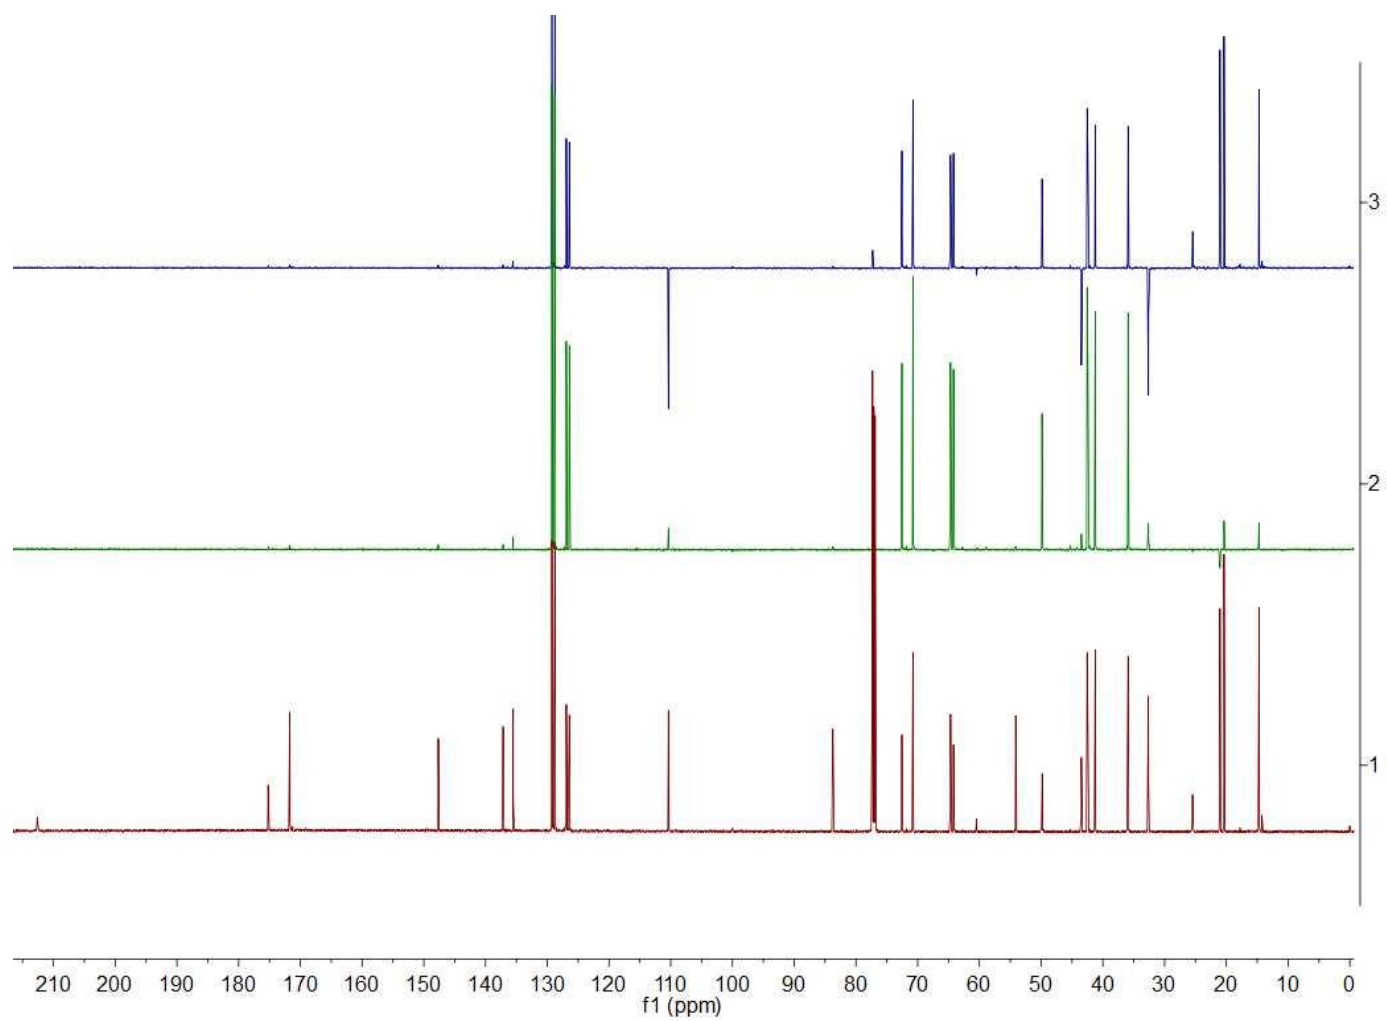

**Fig. S63.** DEPT of 7.

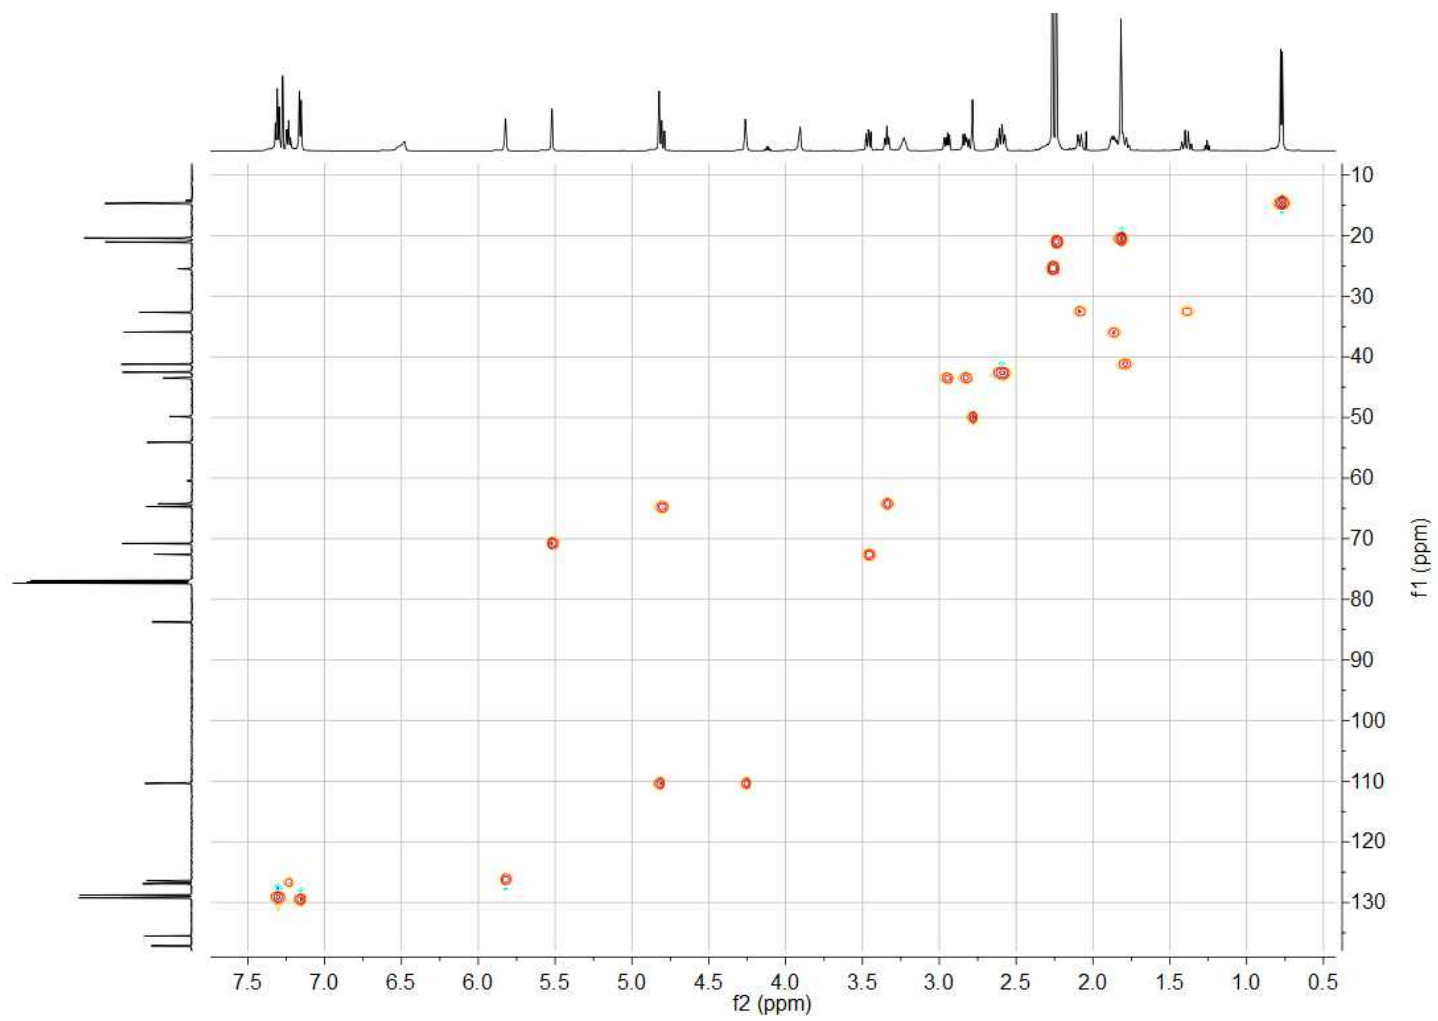

Fig. S64. HSQC of 7.

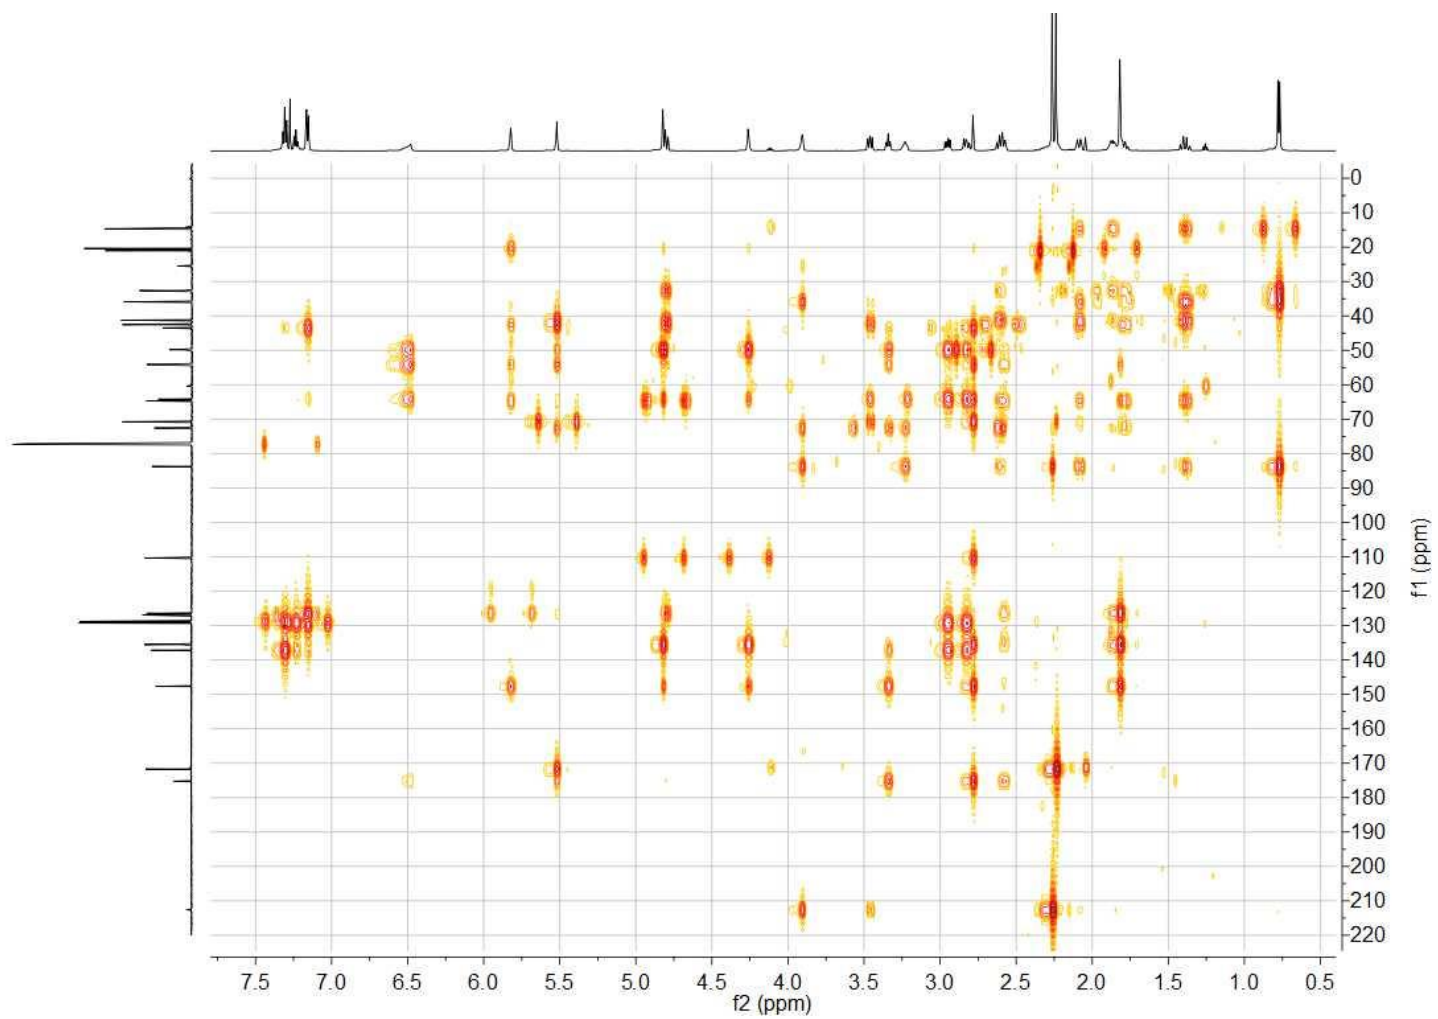

Fig. S65. HMBC of 7.

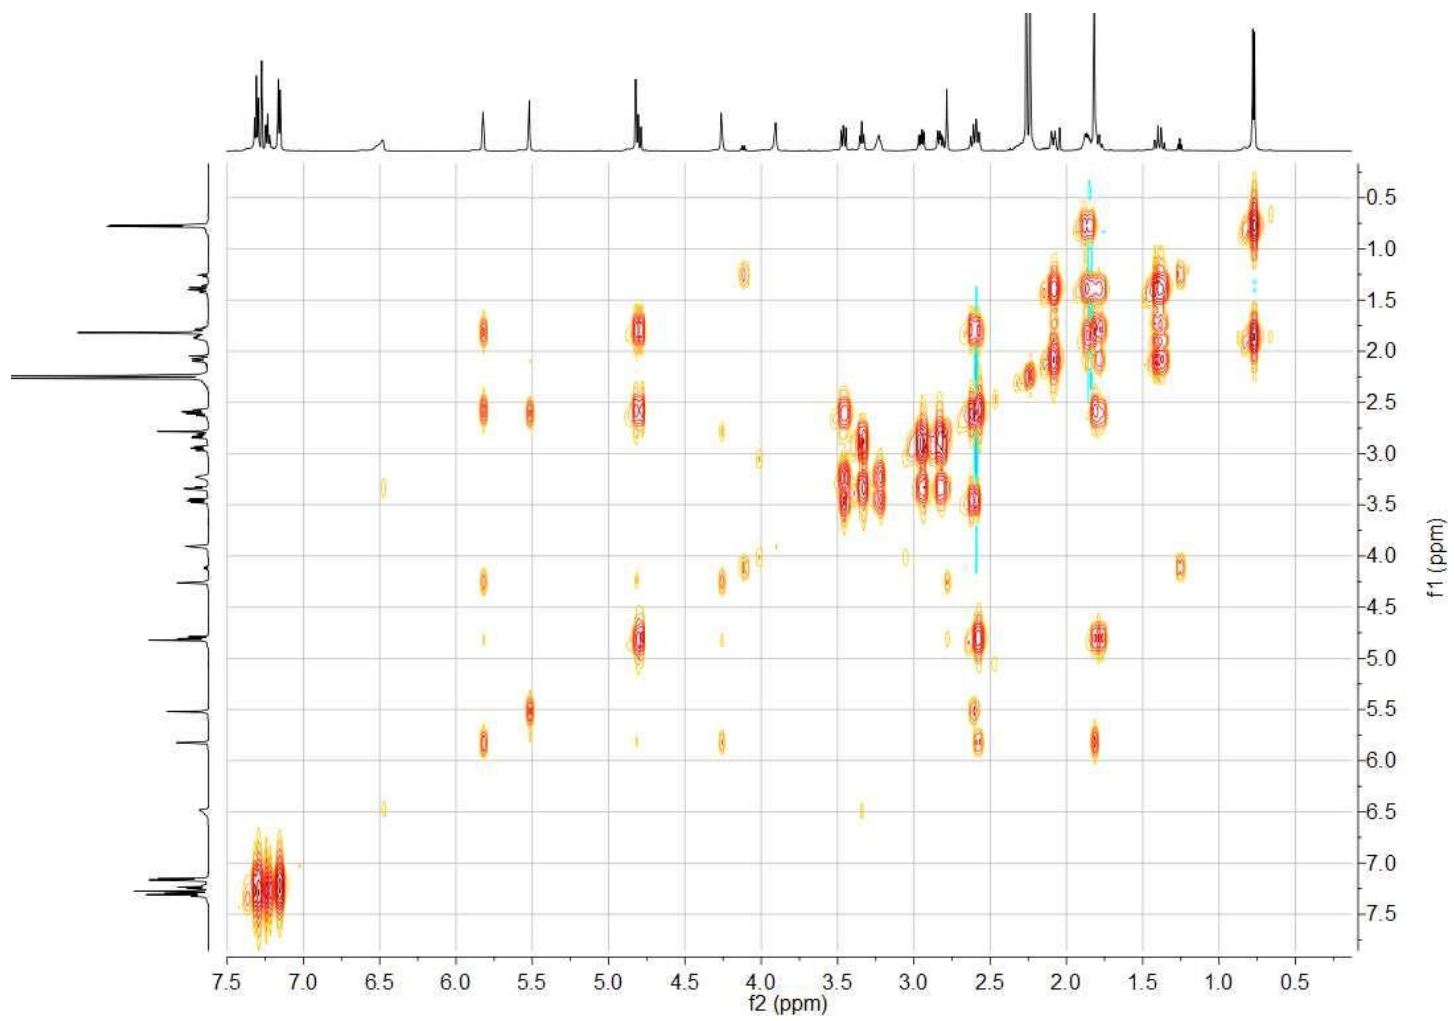

Fig. S66.  $^1\text{H}$ - $^1\text{H}$  COSY of 7.



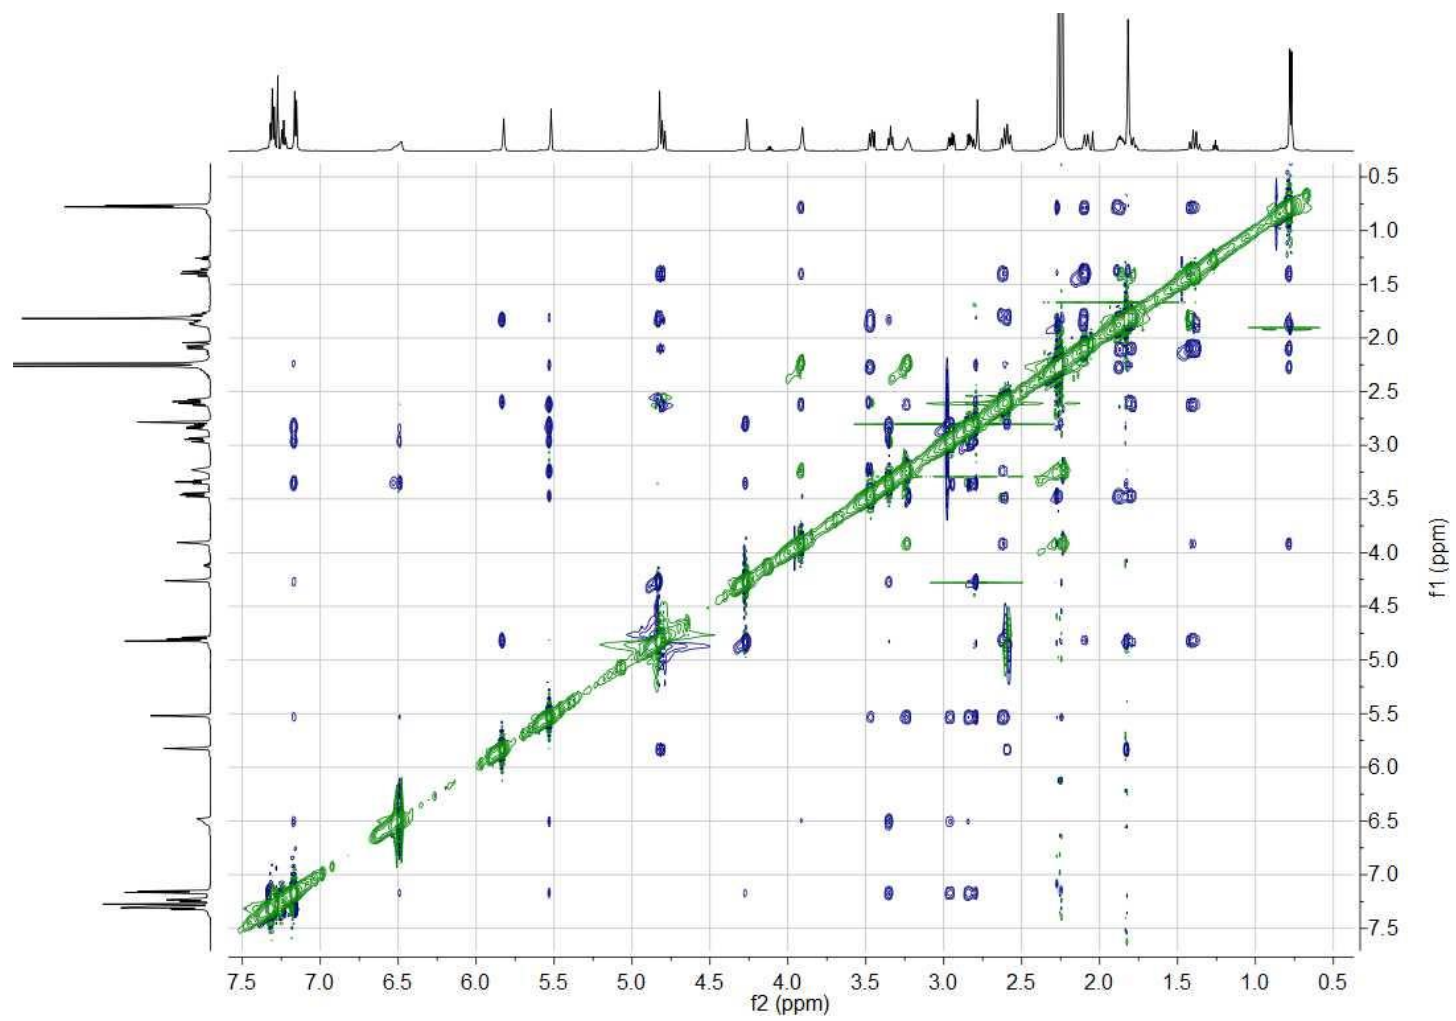

Fig. S67. ROESY of 7.

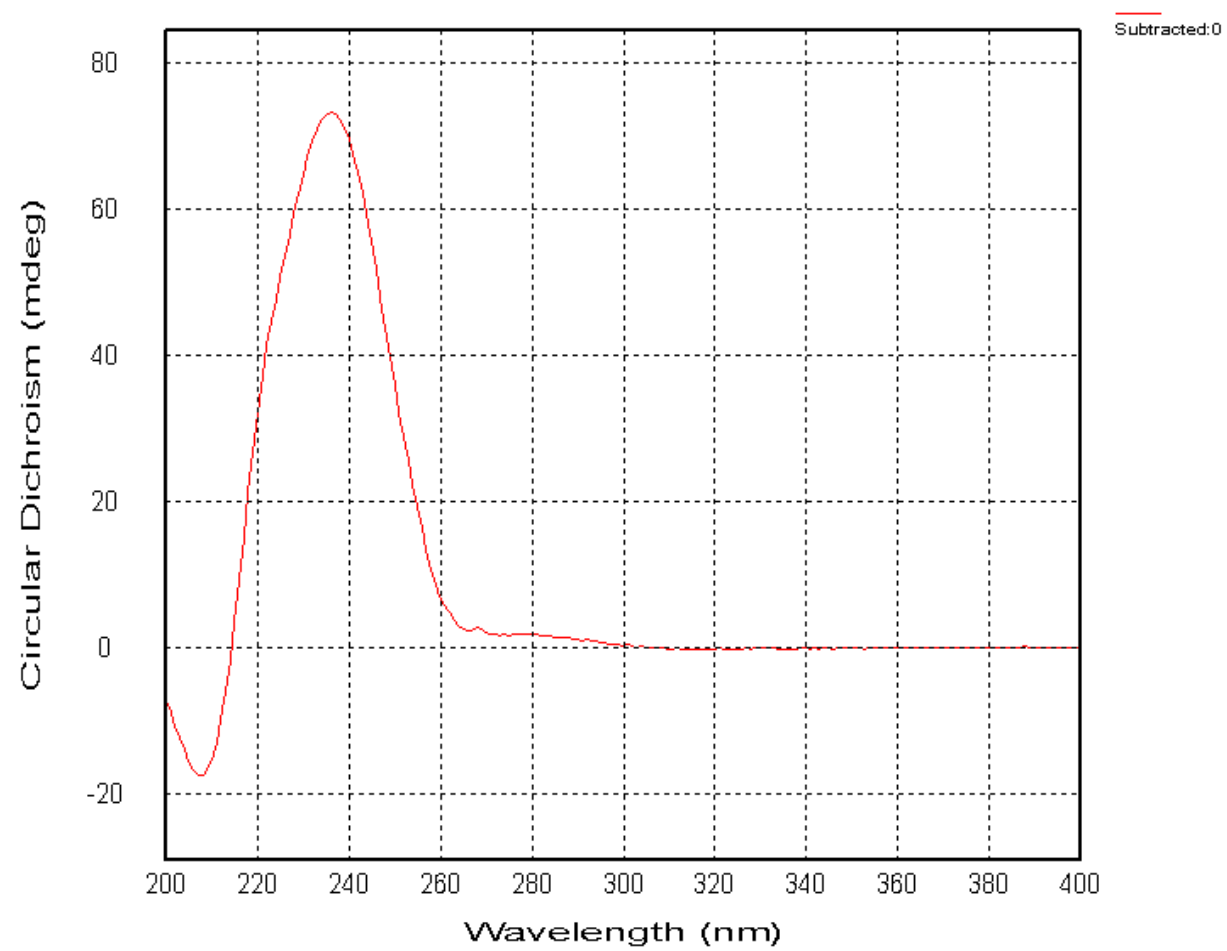

Fig. S68. Experimental ECD of 7.

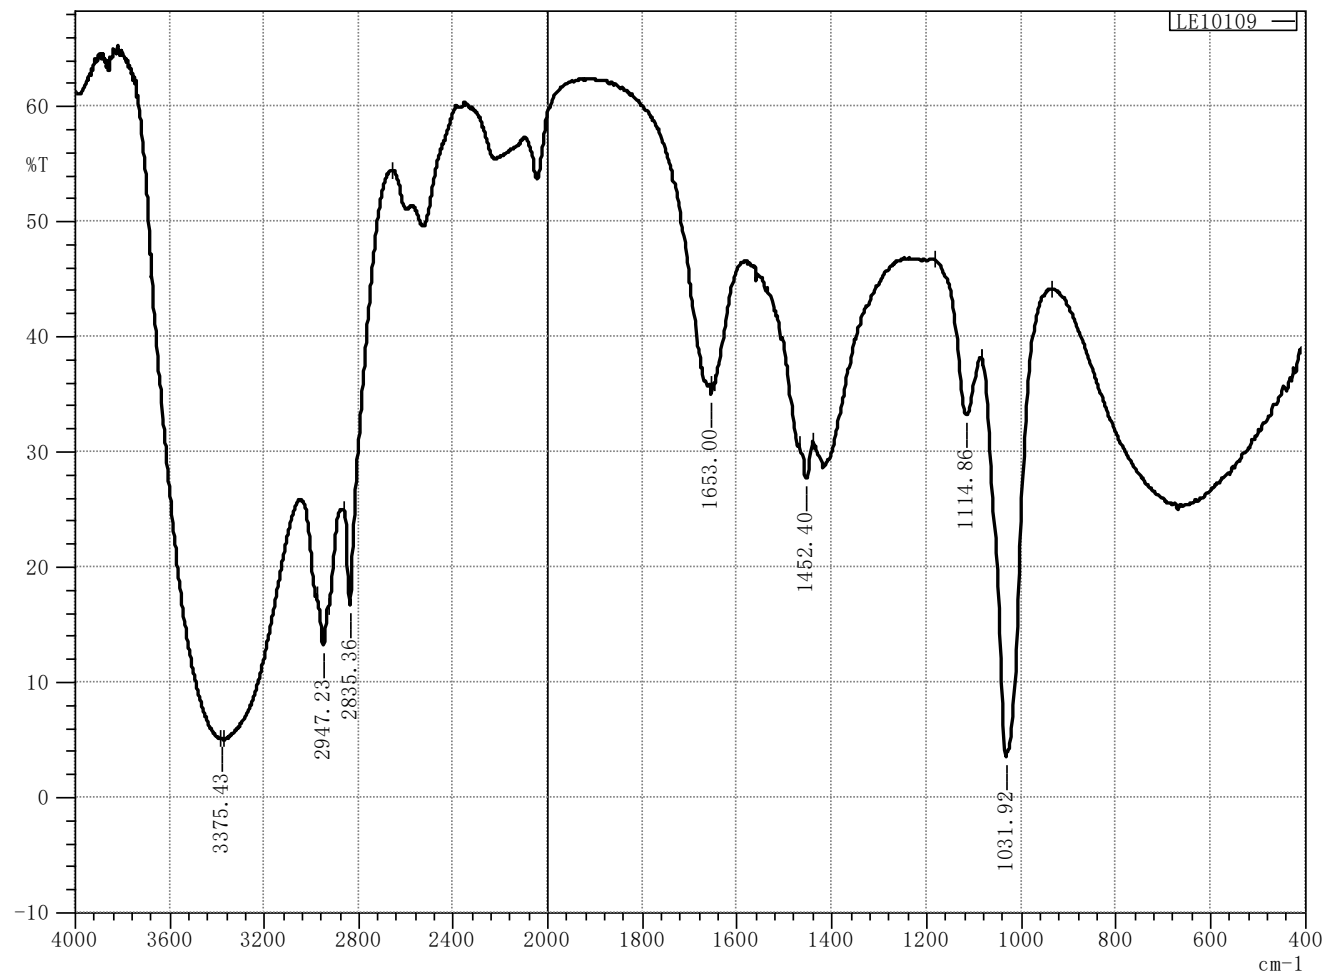

Fig. S69. IR of 7.

E106R25 #1302 RT: 18.09 AV: 1 NL: 1.55E8  
T: FTMS + p ESI Full lock ms [200.0000-2000.0000]

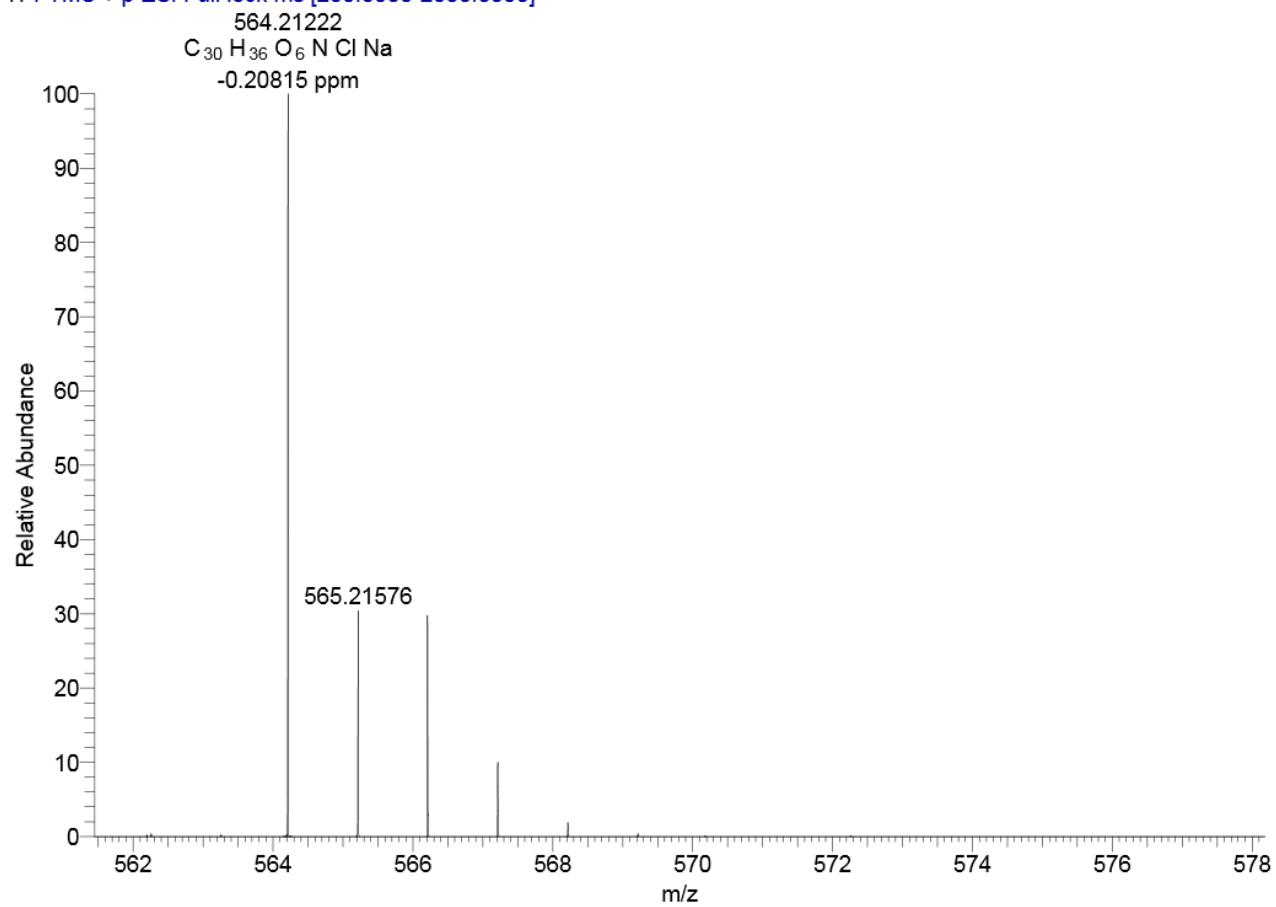

Fig. S70. HRESIMS of 7.

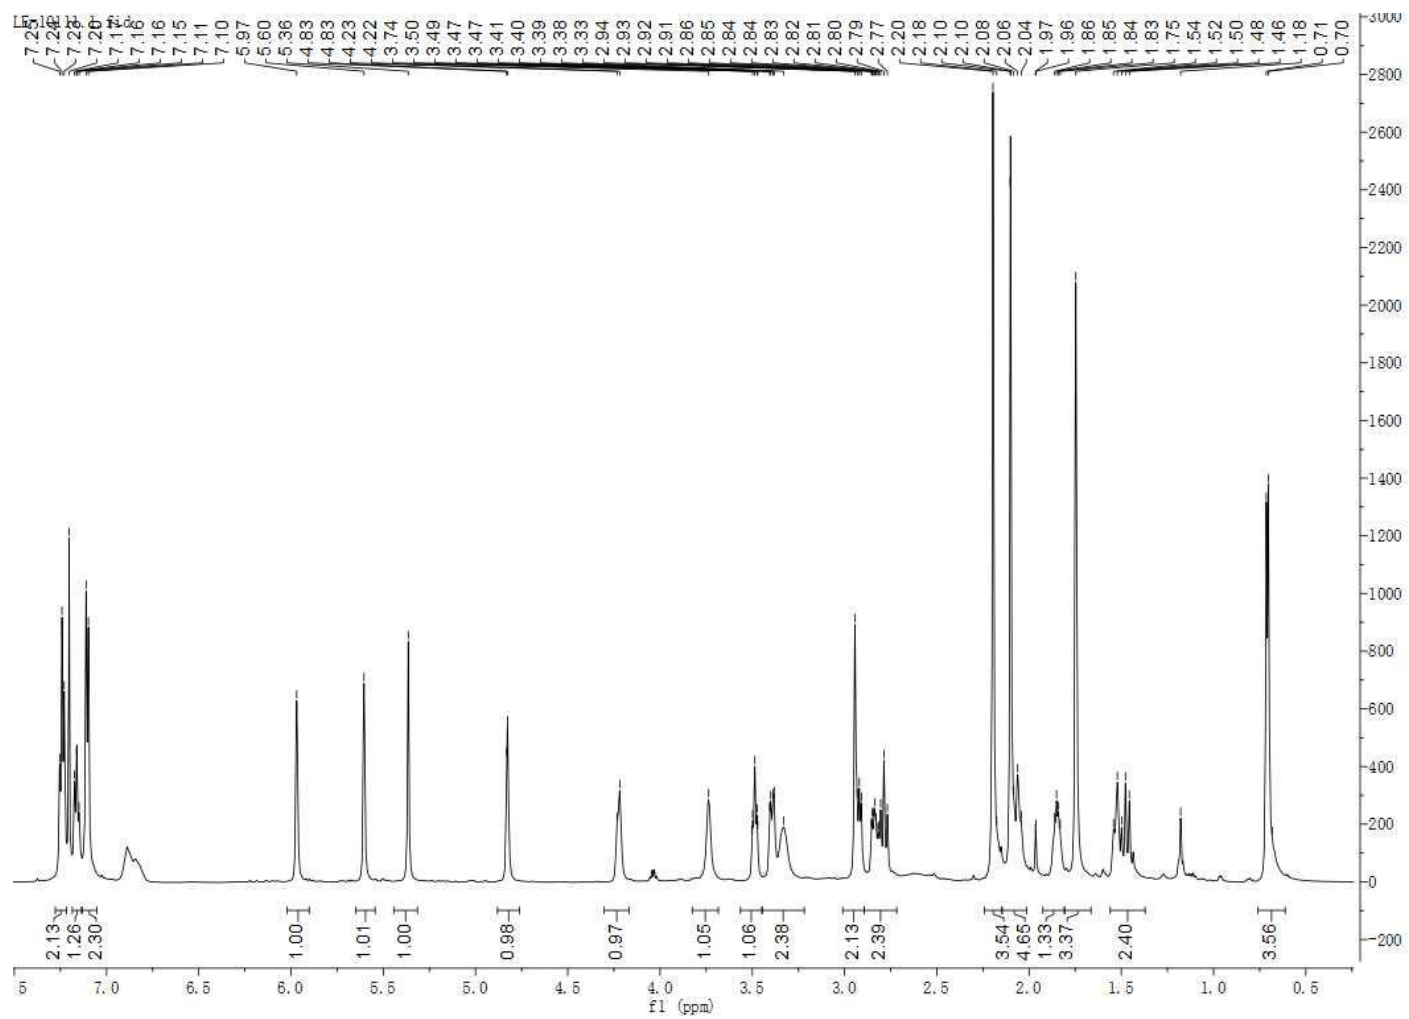

Fig. S71.  $^1\text{H}$  NMR of **8** ( $\text{CDCl}_3$ , 600 MHz).

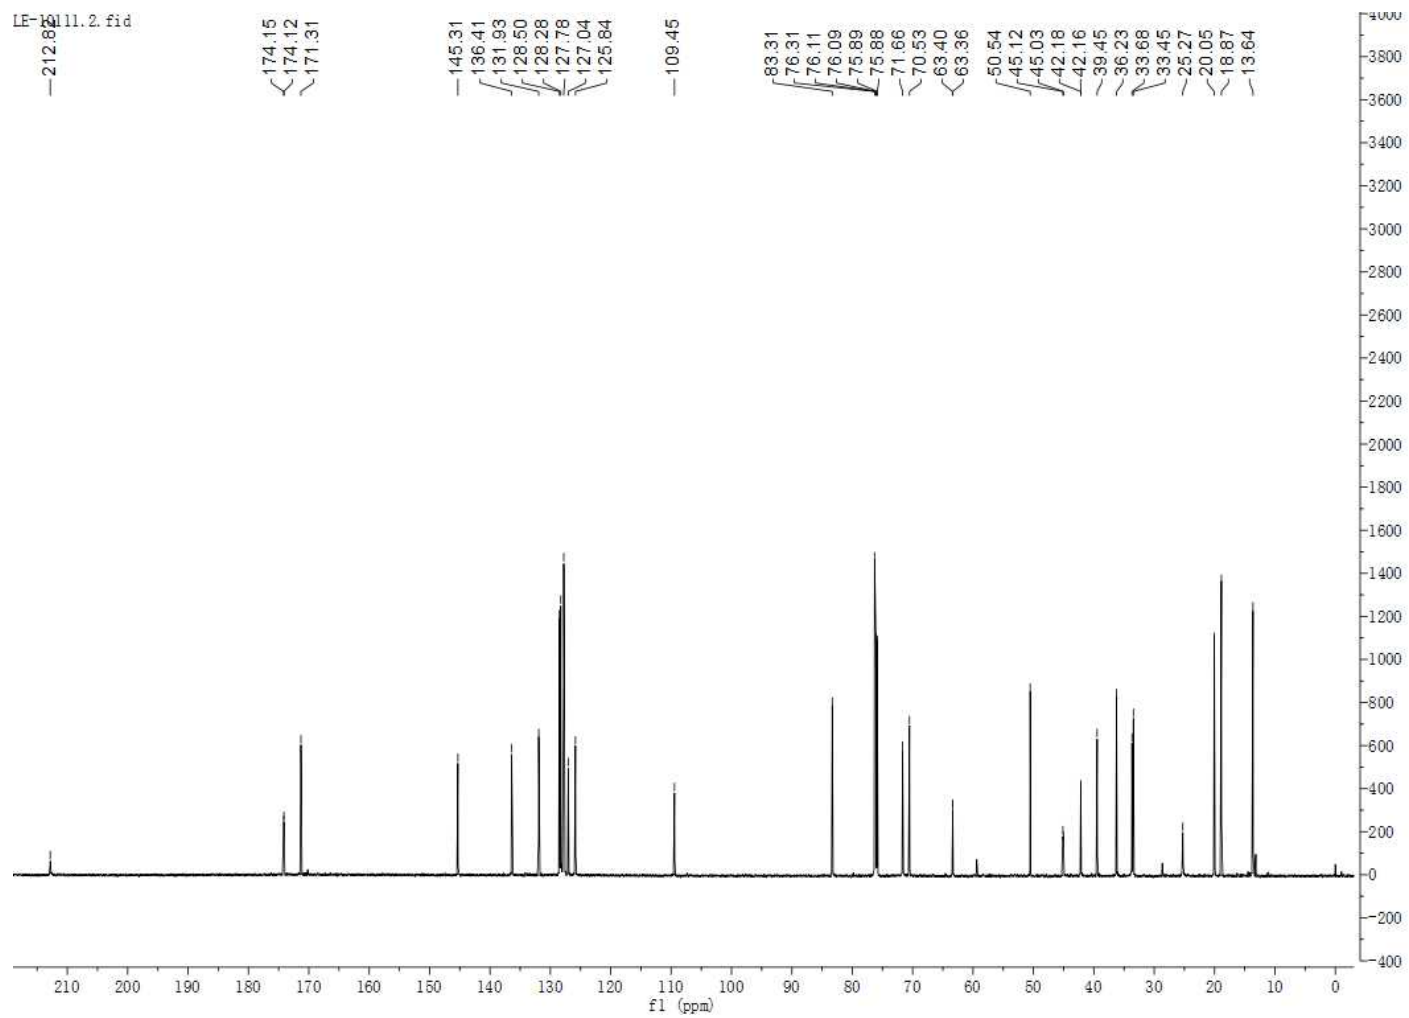

Fig. S72.  $^{13}\text{C}$  NMR of **8** ( $\text{CDCl}_3$ , 150 MHz).

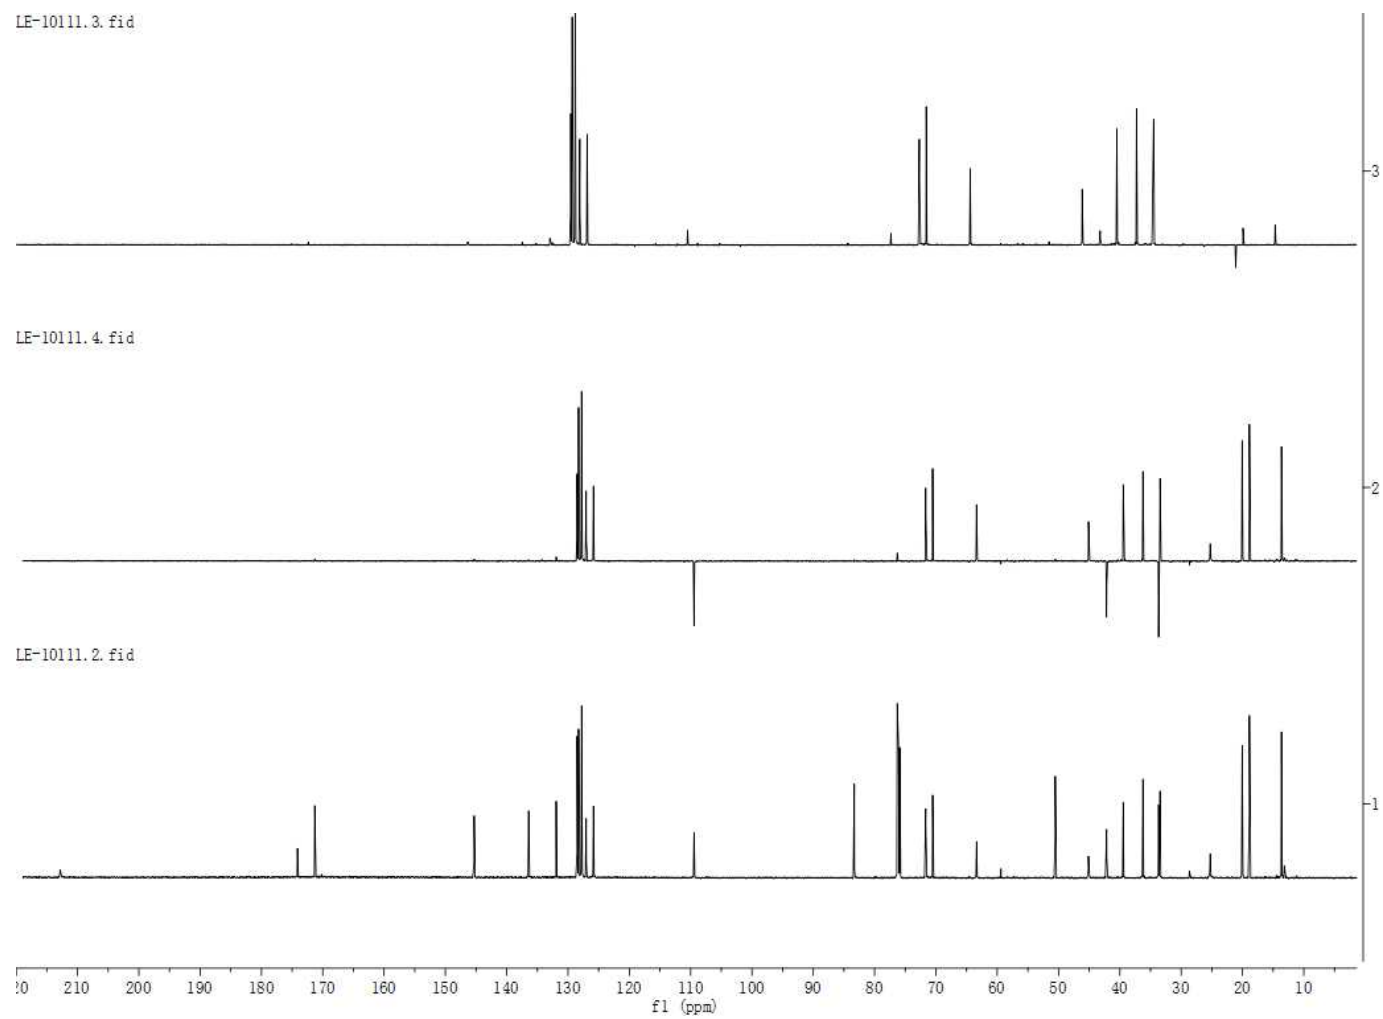

**Fig. S73.** DEPT of **8**.

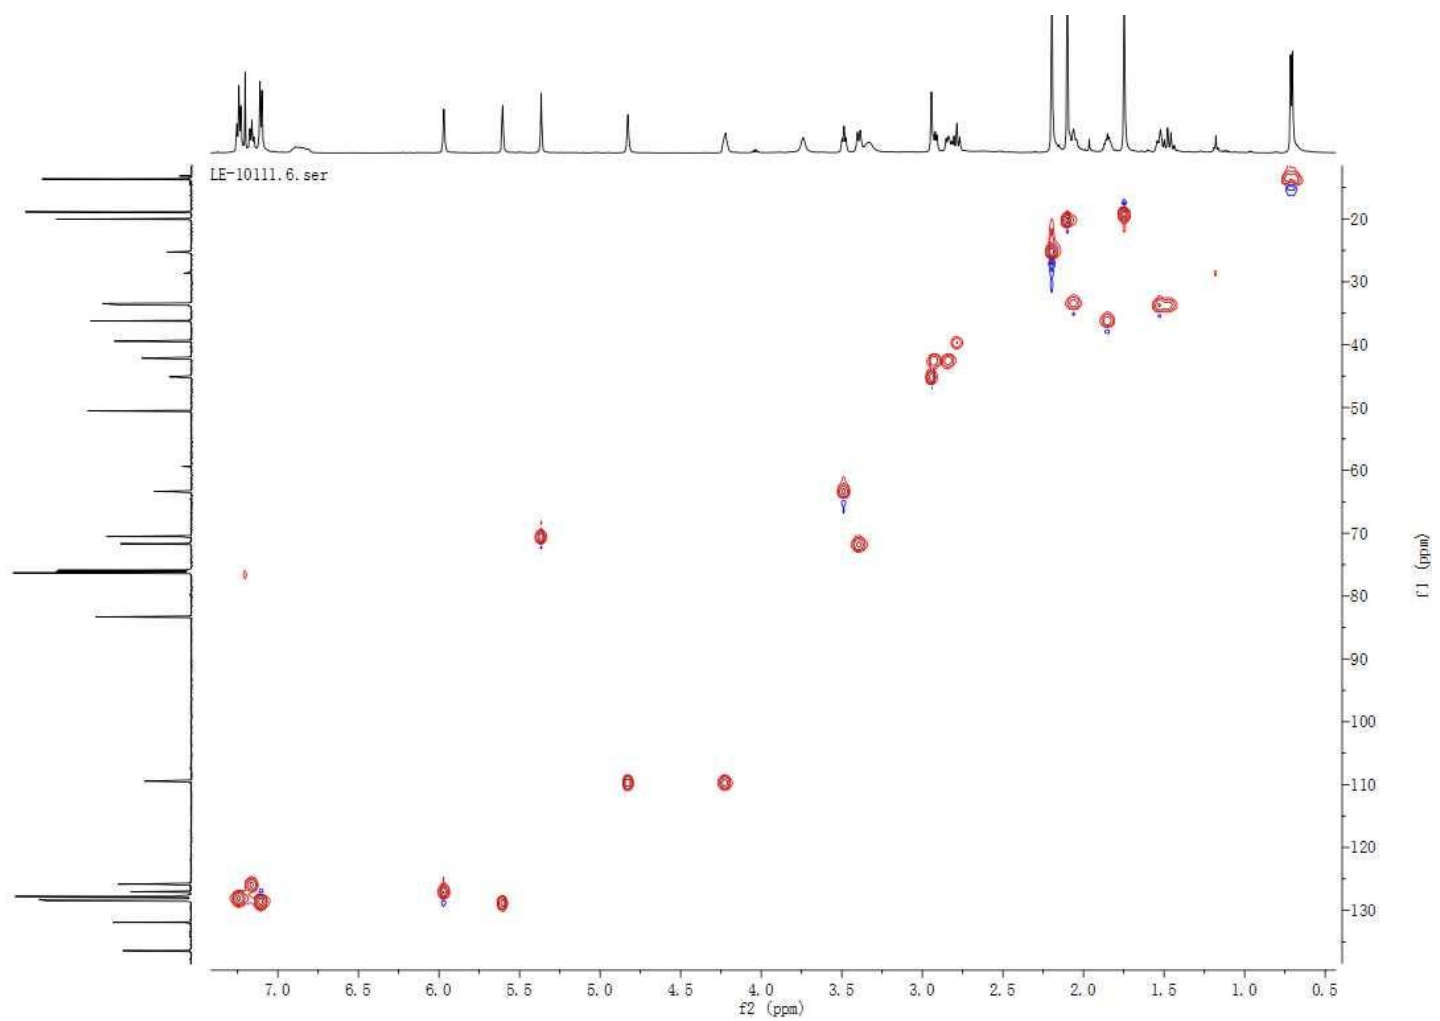

Fig. S74. HSQC of 8.



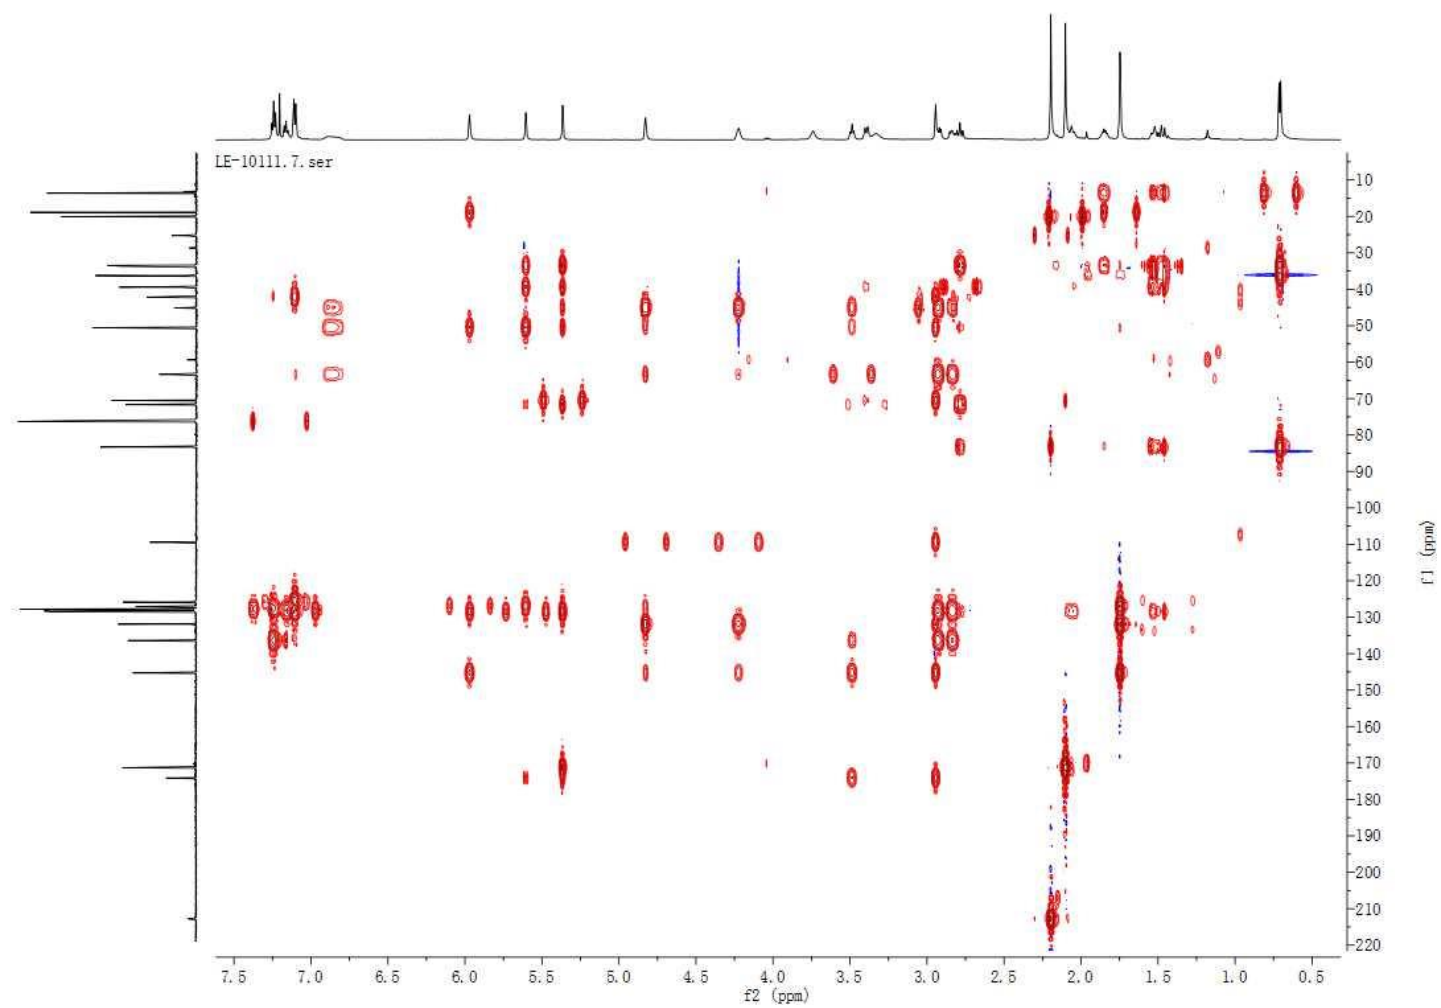

Fig. S75. HMBC of 8.

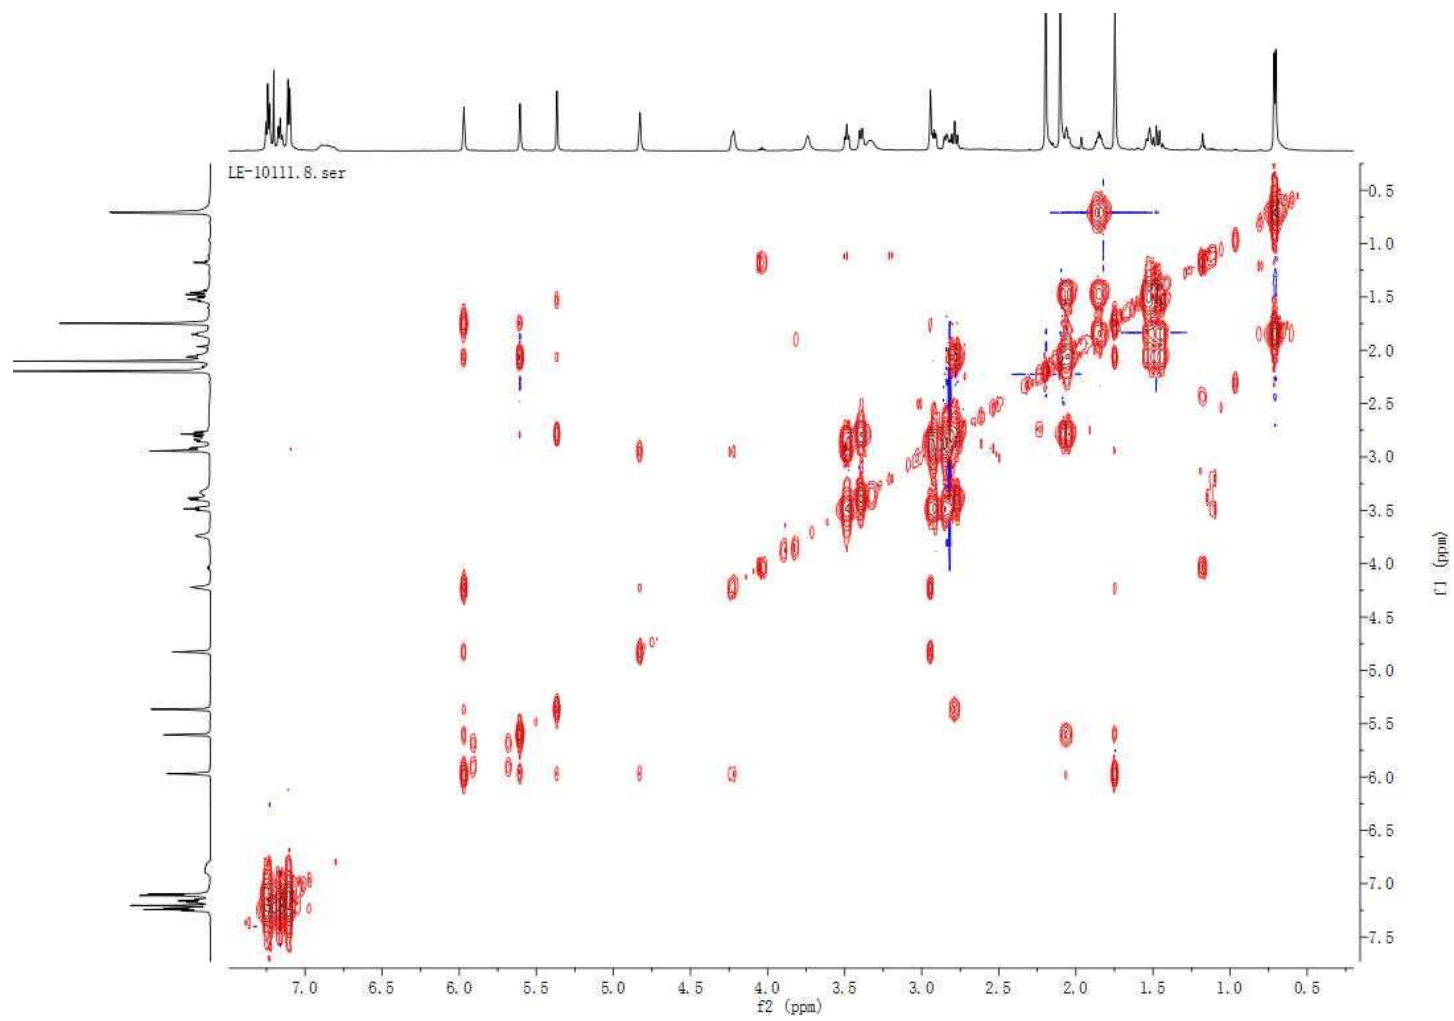

Fig. S76.  $^1\text{H}$ - $^1\text{H}$  COSY of **8**.

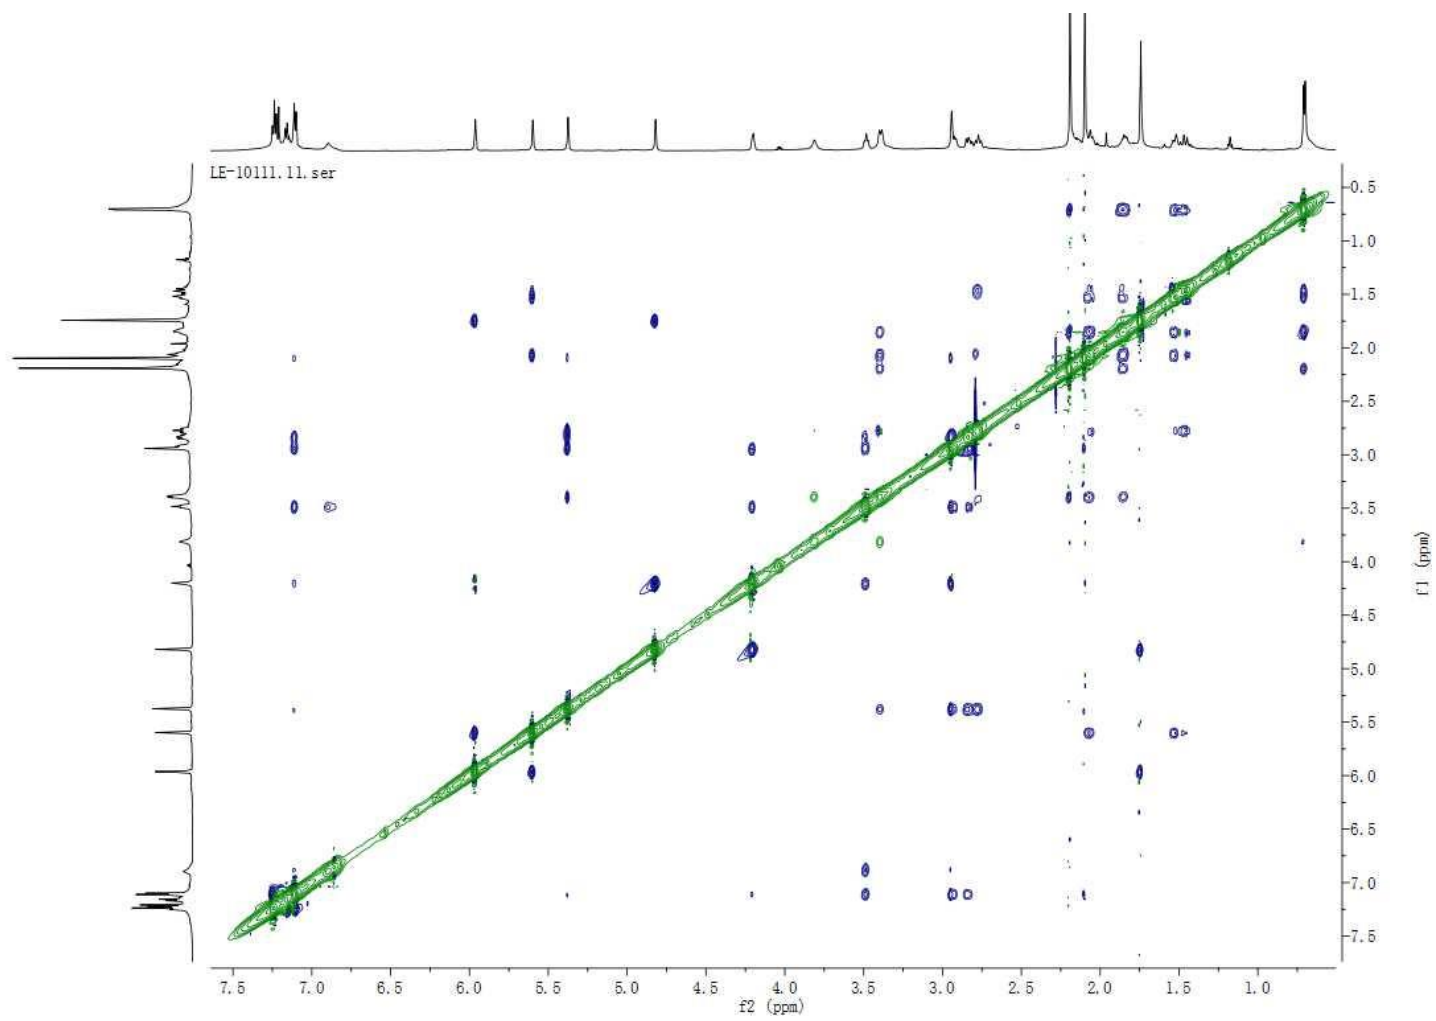

Fig. S77. ROESY of 8.

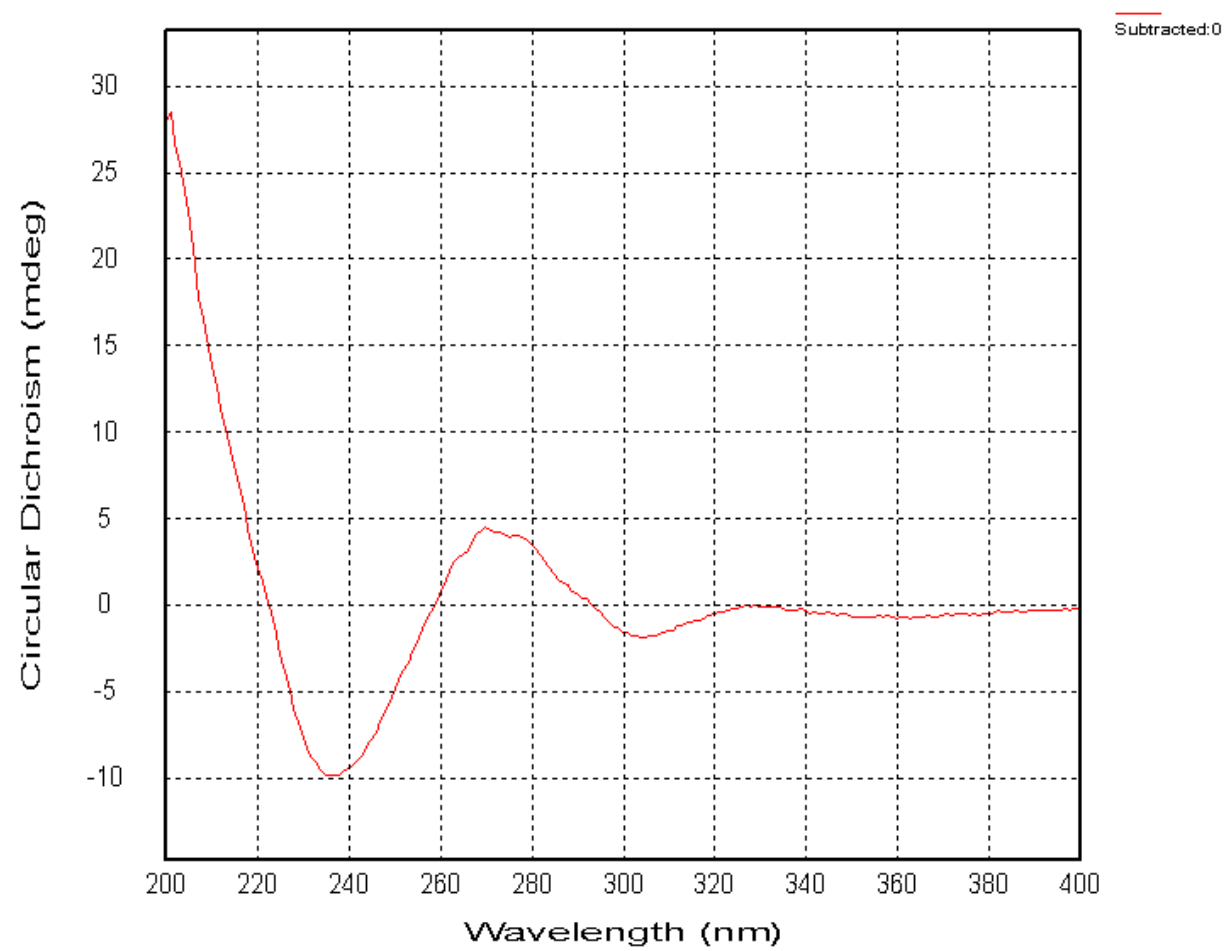

Fig. S78. Experimental ECD of **8**.

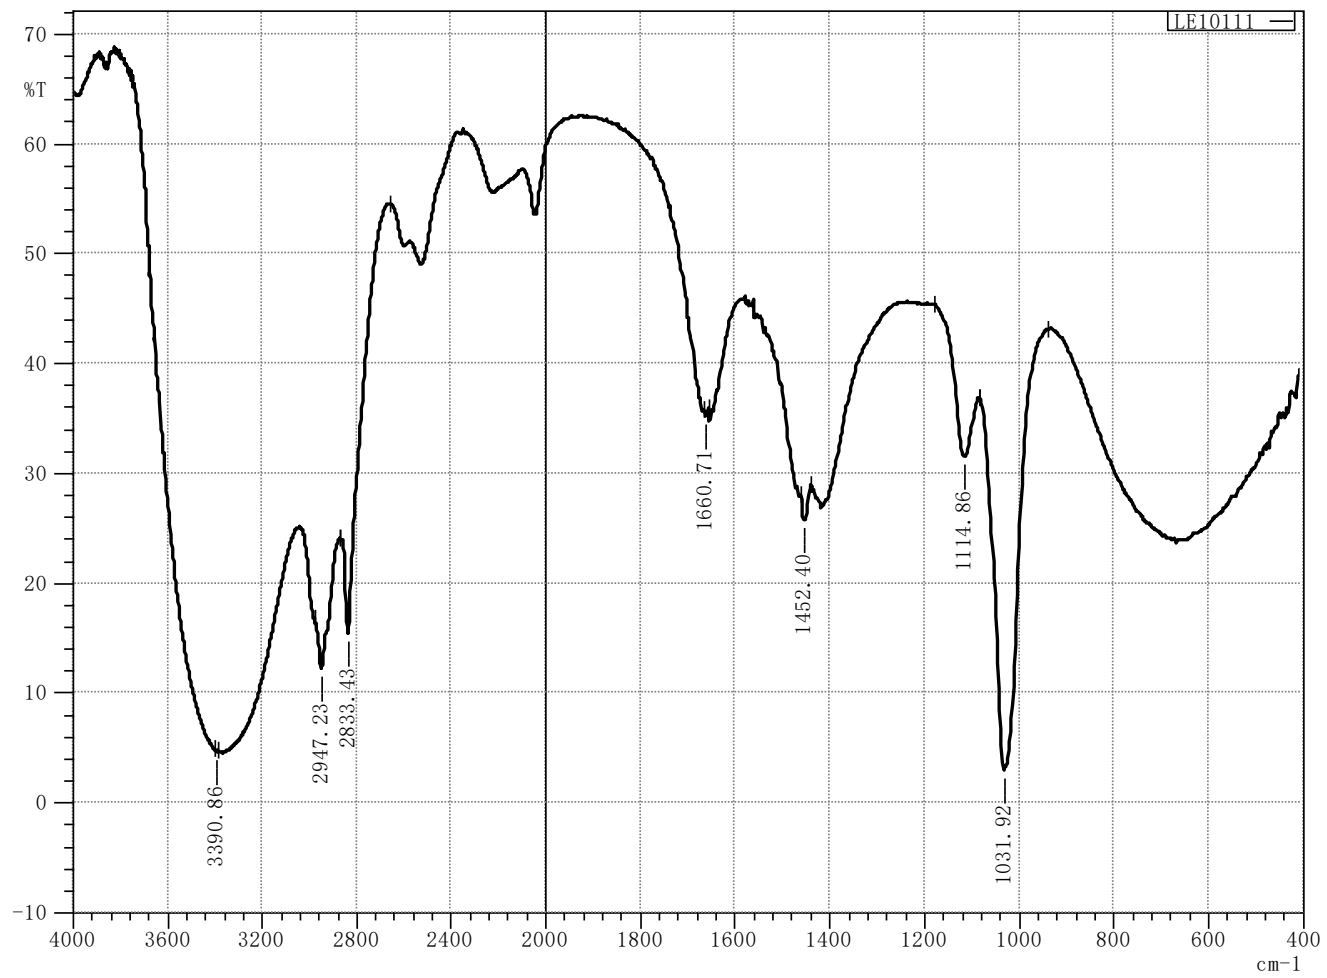

Fig. S79. IR of 8.

LE10111 #1704 RT: 14.86 AV: 1 NL: 1.92E8  
T: FTMS + p ESI Full lock ms [100.0000-1000.0000]

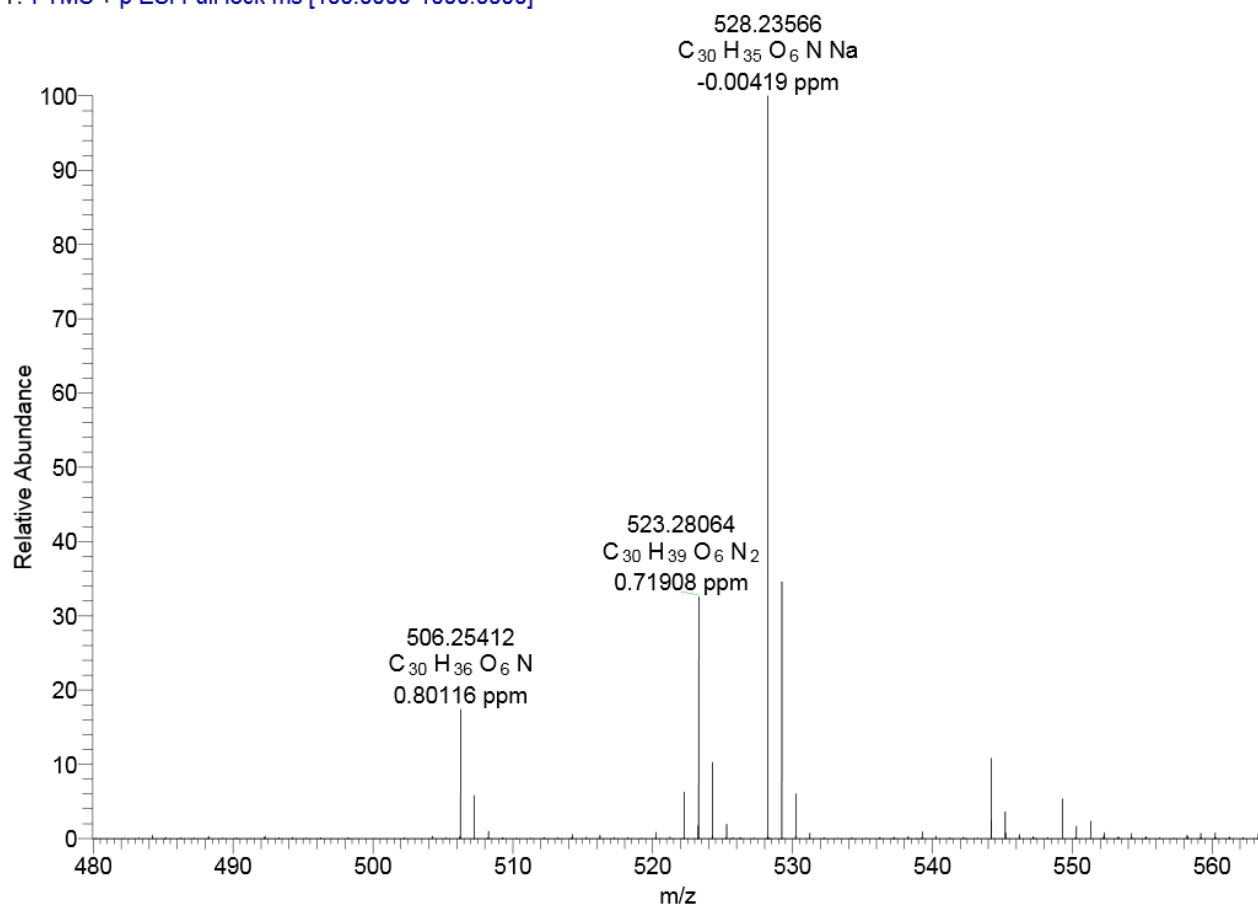

Fig. S80. HRESIMS of 8.

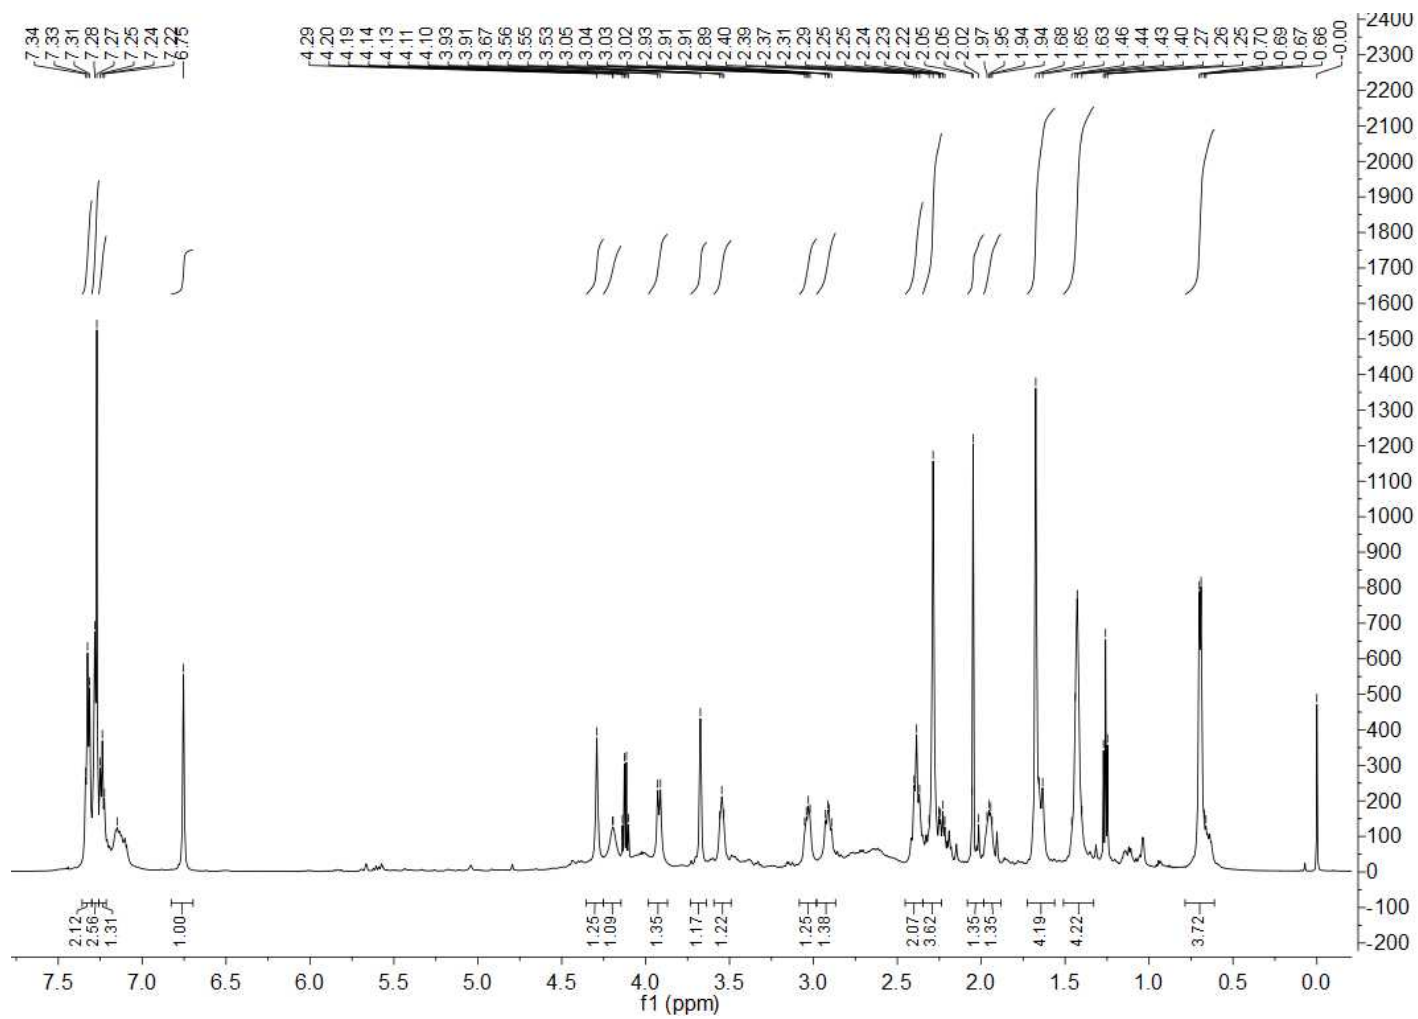

**Fig. S81.**  $^1\text{H}$  NMR of **9** ( $\text{CDCl}_3$ , 600 MHz).

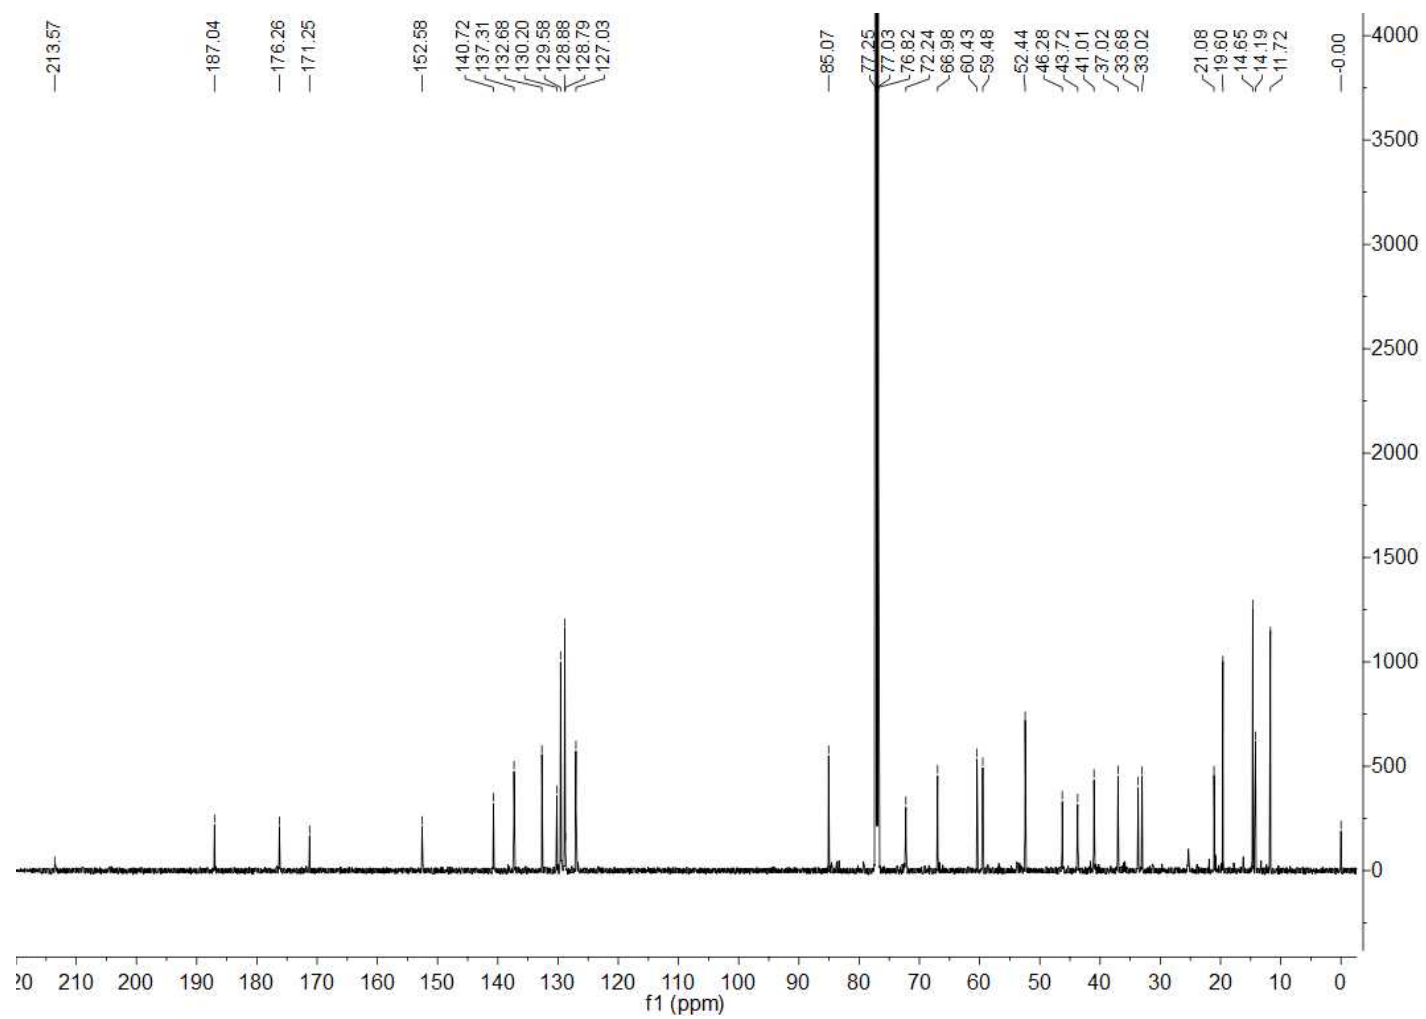

Fig. S82.  $^{13}\text{C}$  NMR of **9** ( $\text{CDCl}_3$ , 150 MHz).



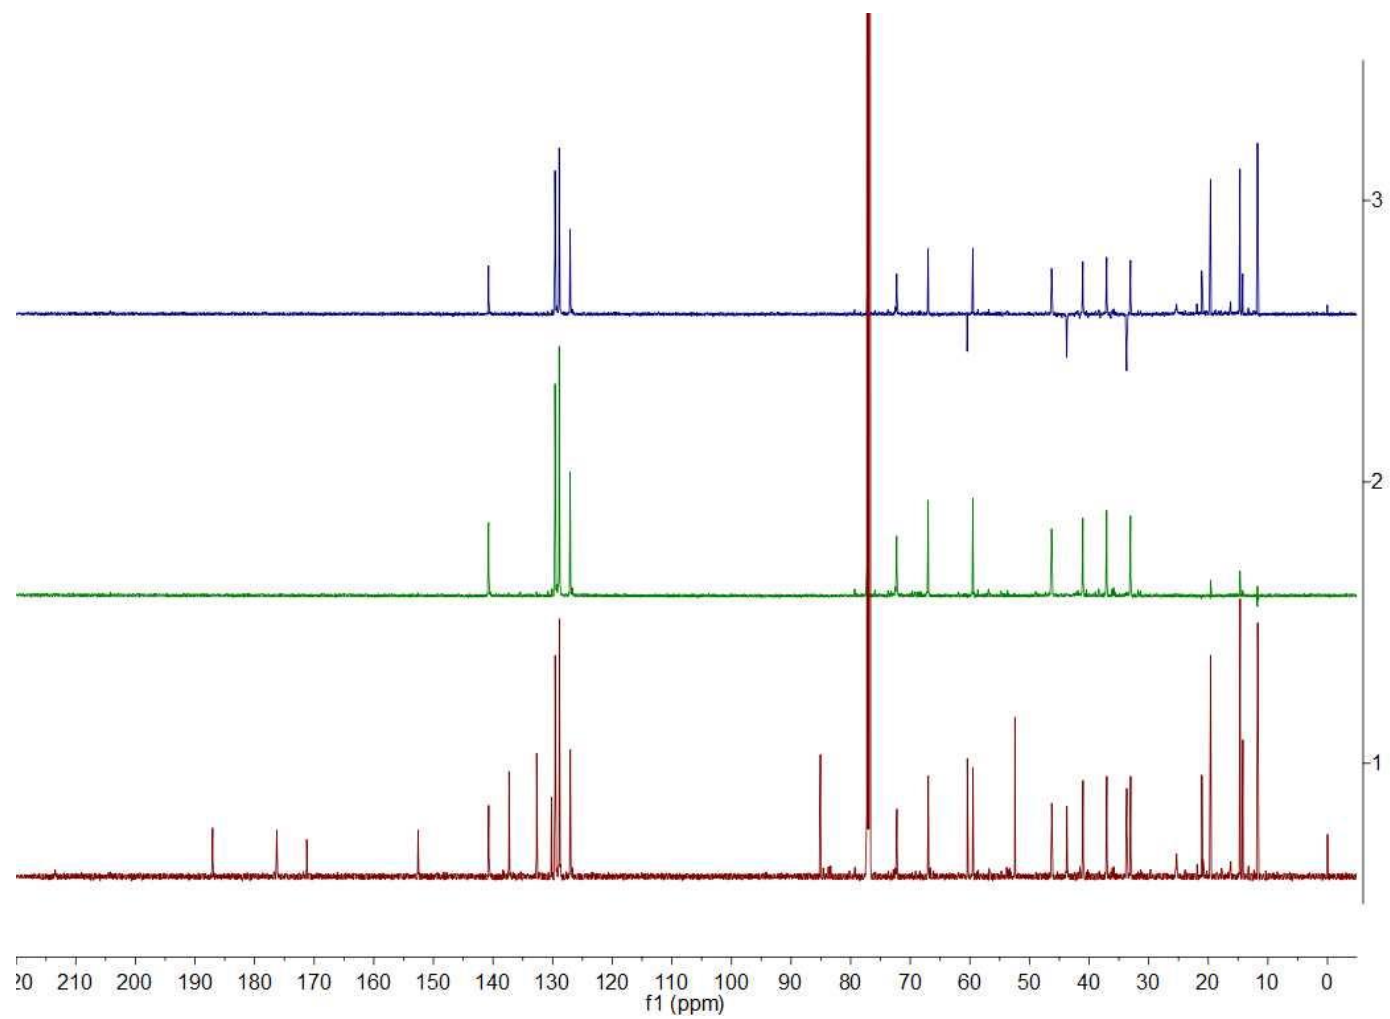

Fig. S83. DEPT of 9.

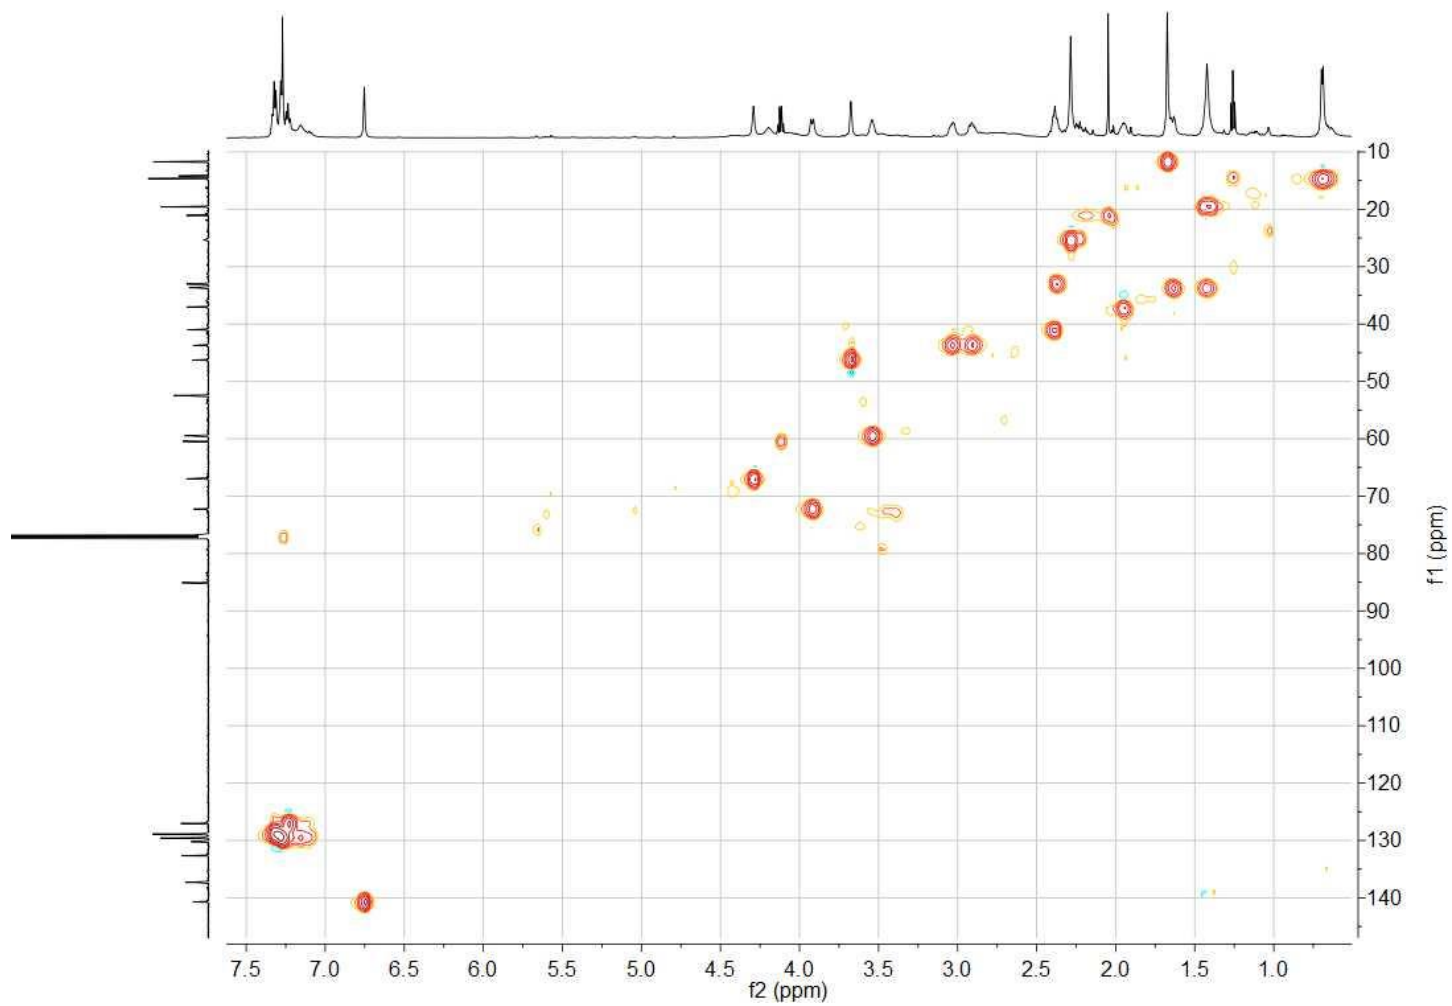

Fig. S84. HSQC of 9.

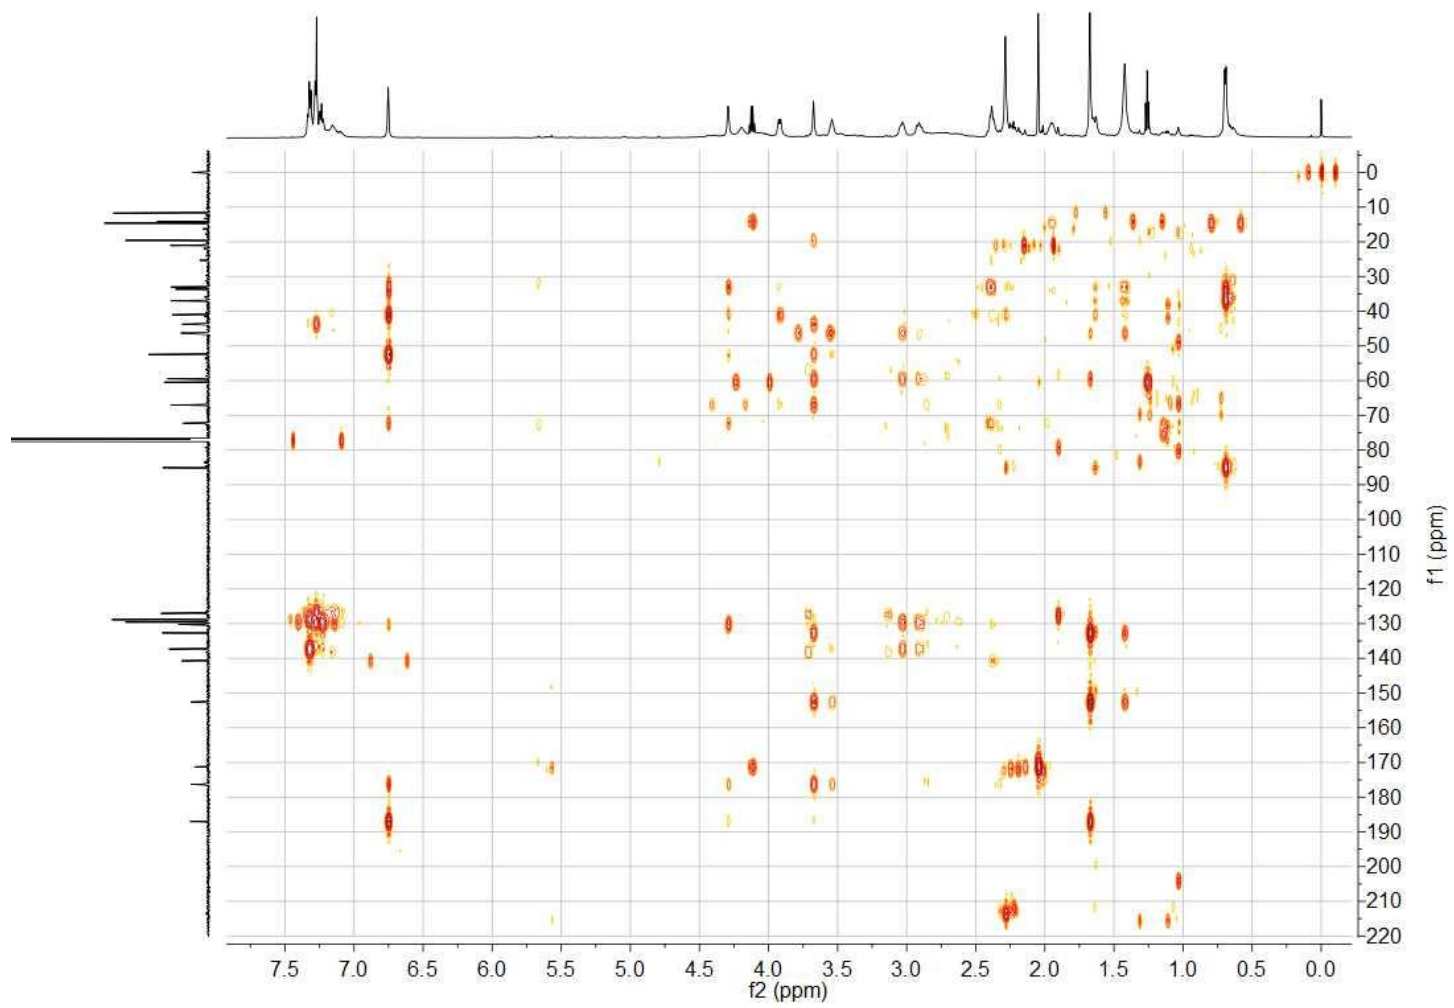

Fig. S85. HMBC of 9.

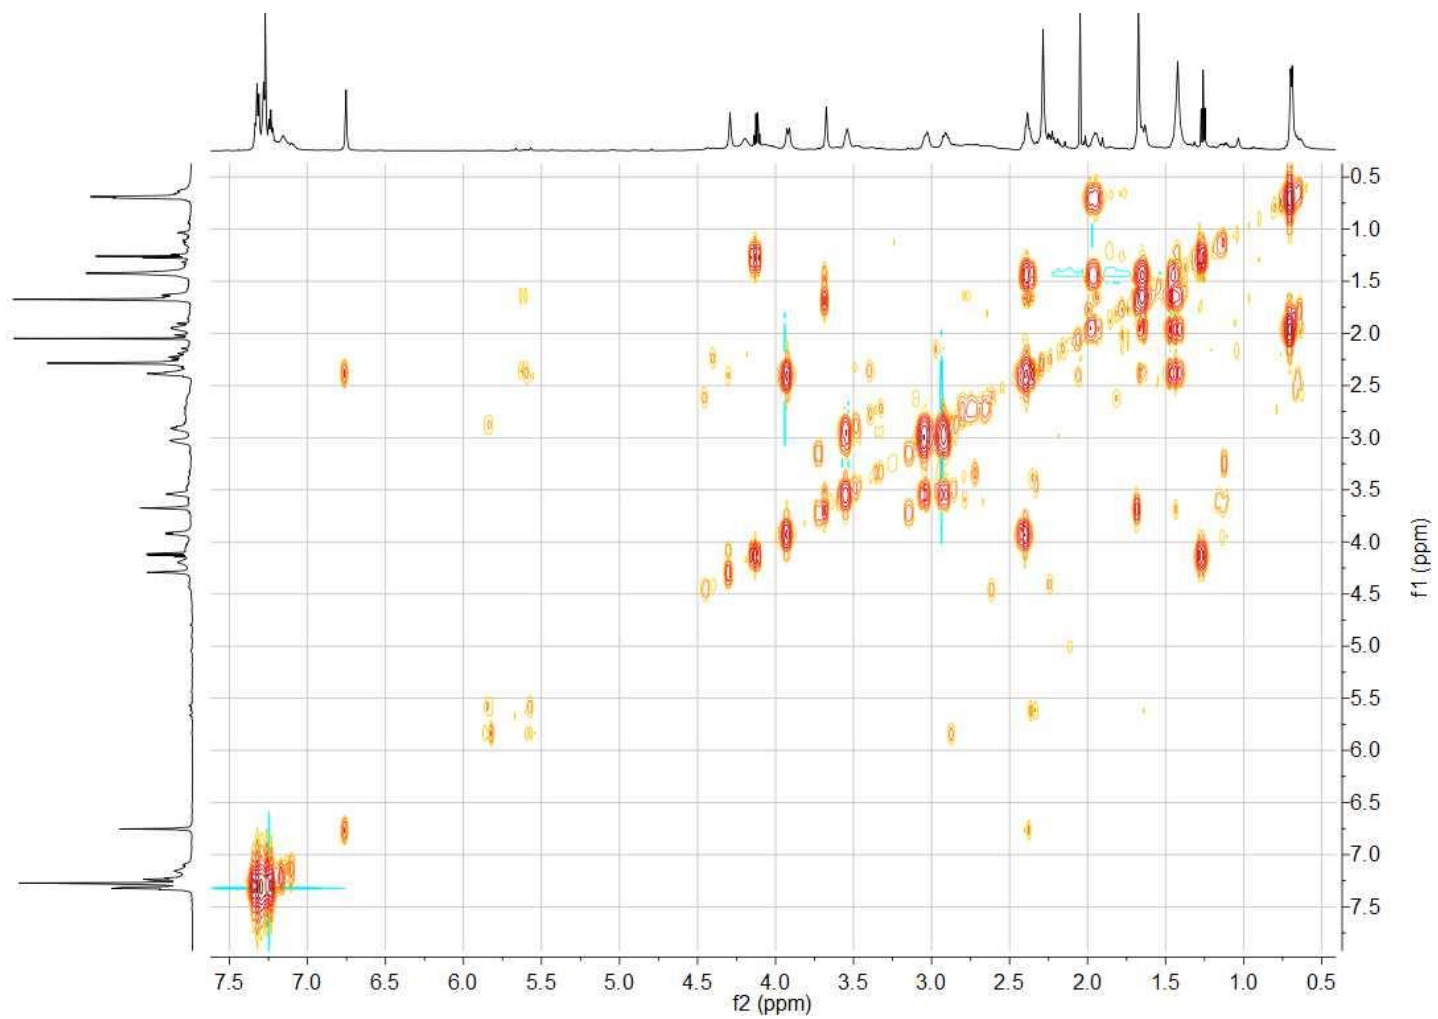

Fig. S86.  $^1\text{H}$ - $^1\text{H}$  COSY of **9**.

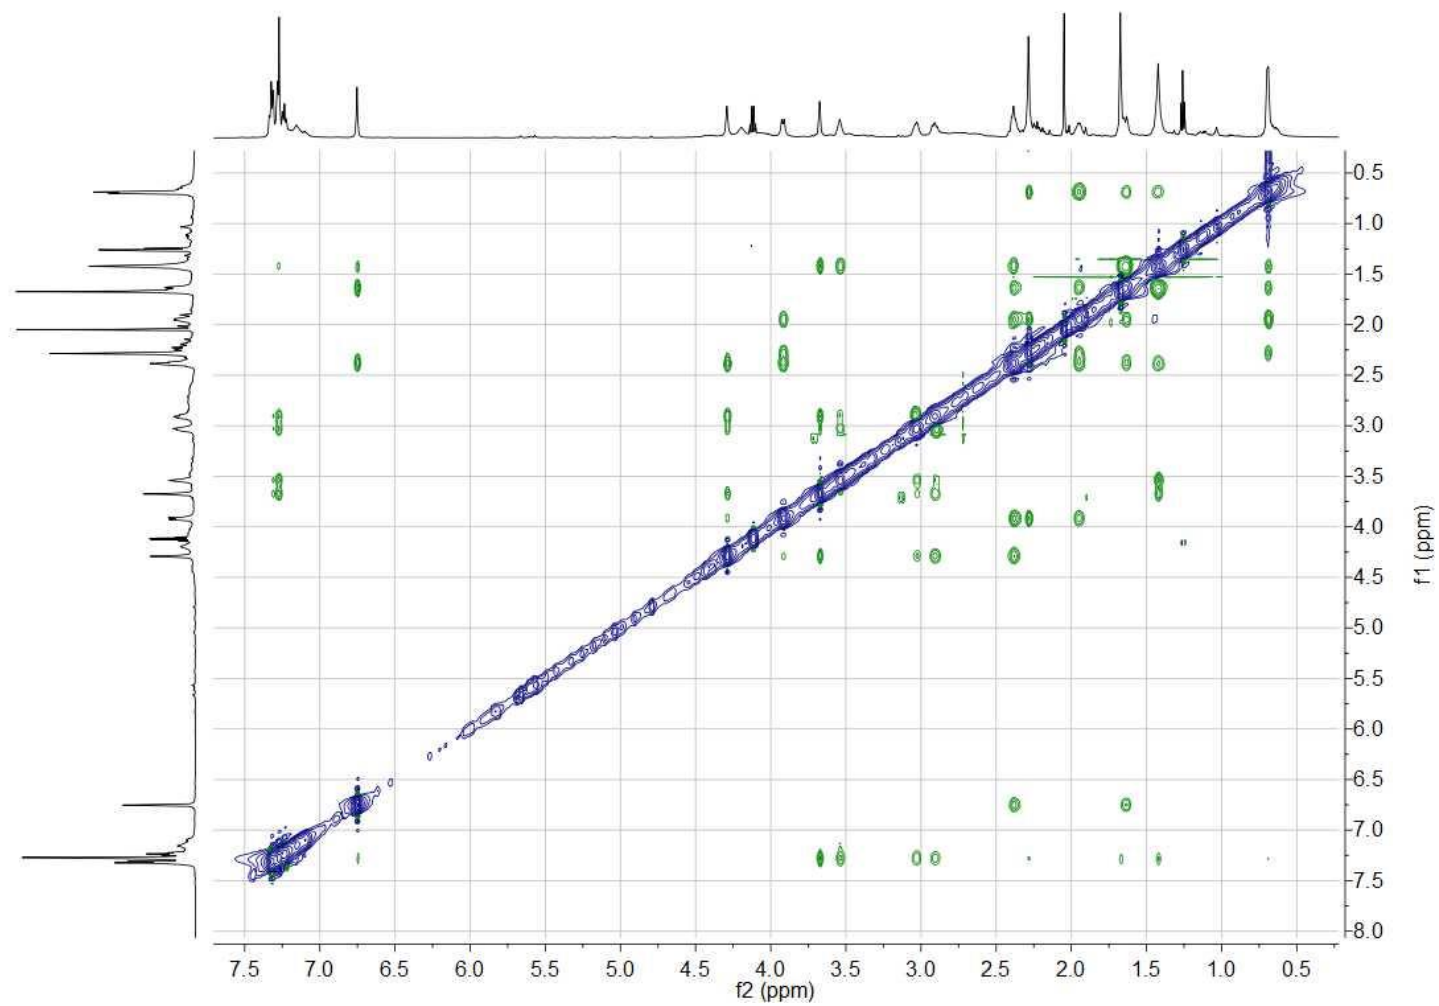

Fig. S87. ROESY of 9.

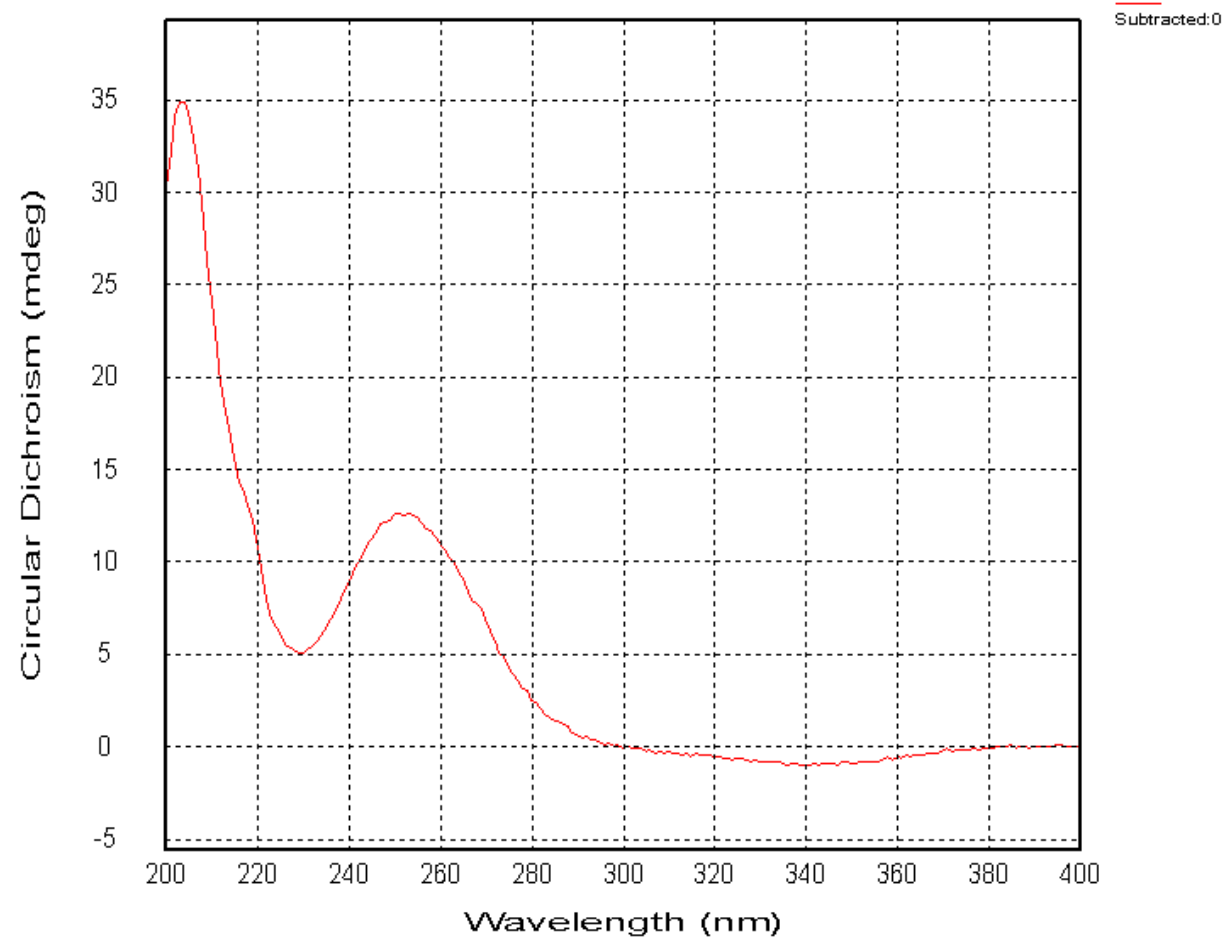

Fig. S88. Experimental ECD of 9.

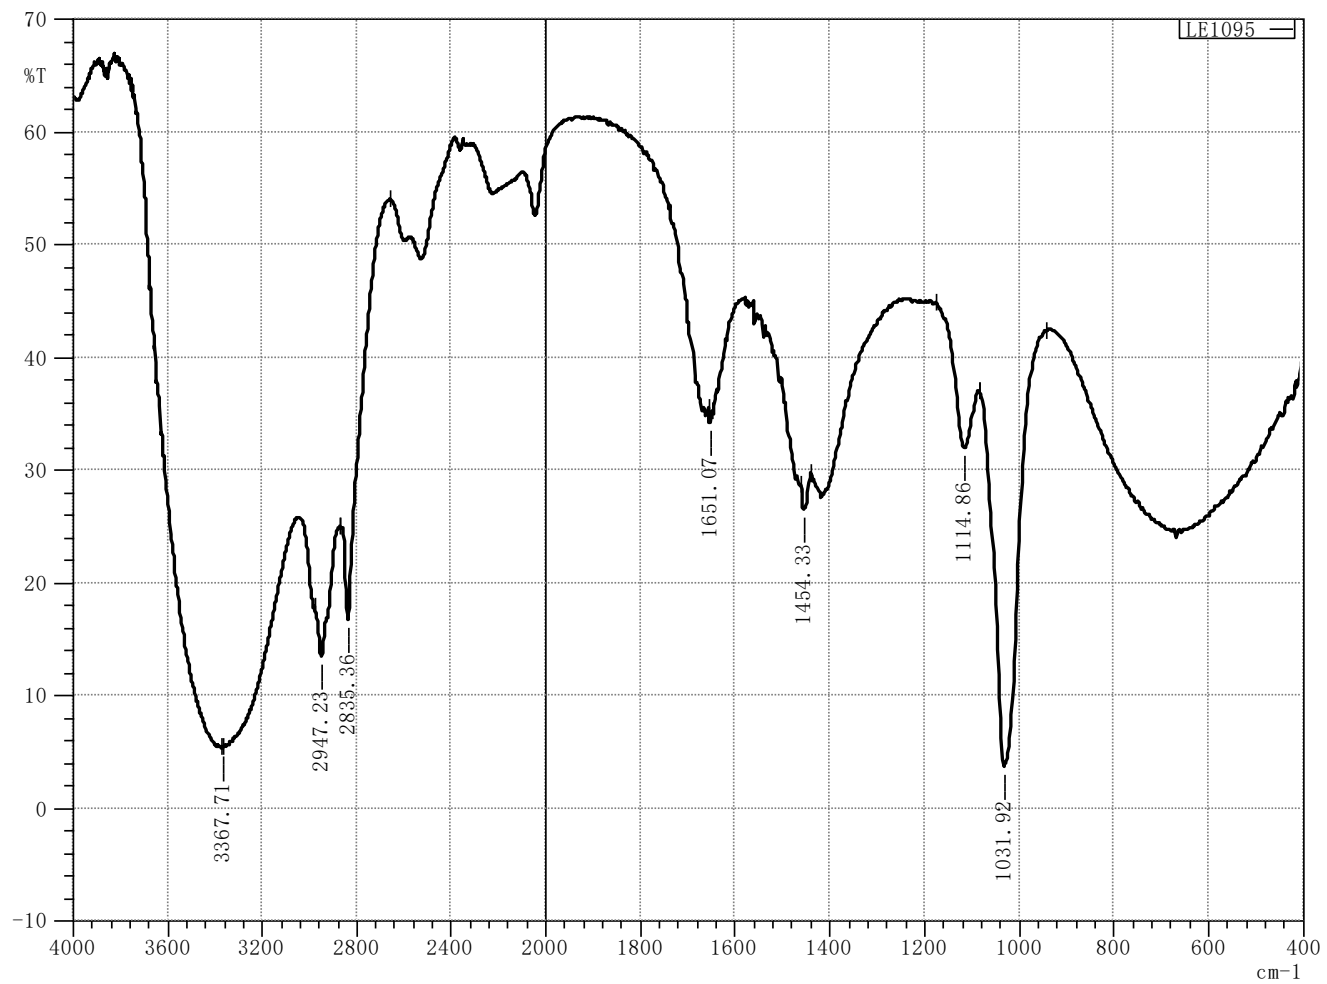

Fig. S89. IR of 9.

LE1095 #1610 RT: 14.04 AV: 1 NL: 3.14E8  
T: FTMS + p ESI Full lock ms [100.0000-1000.0000]

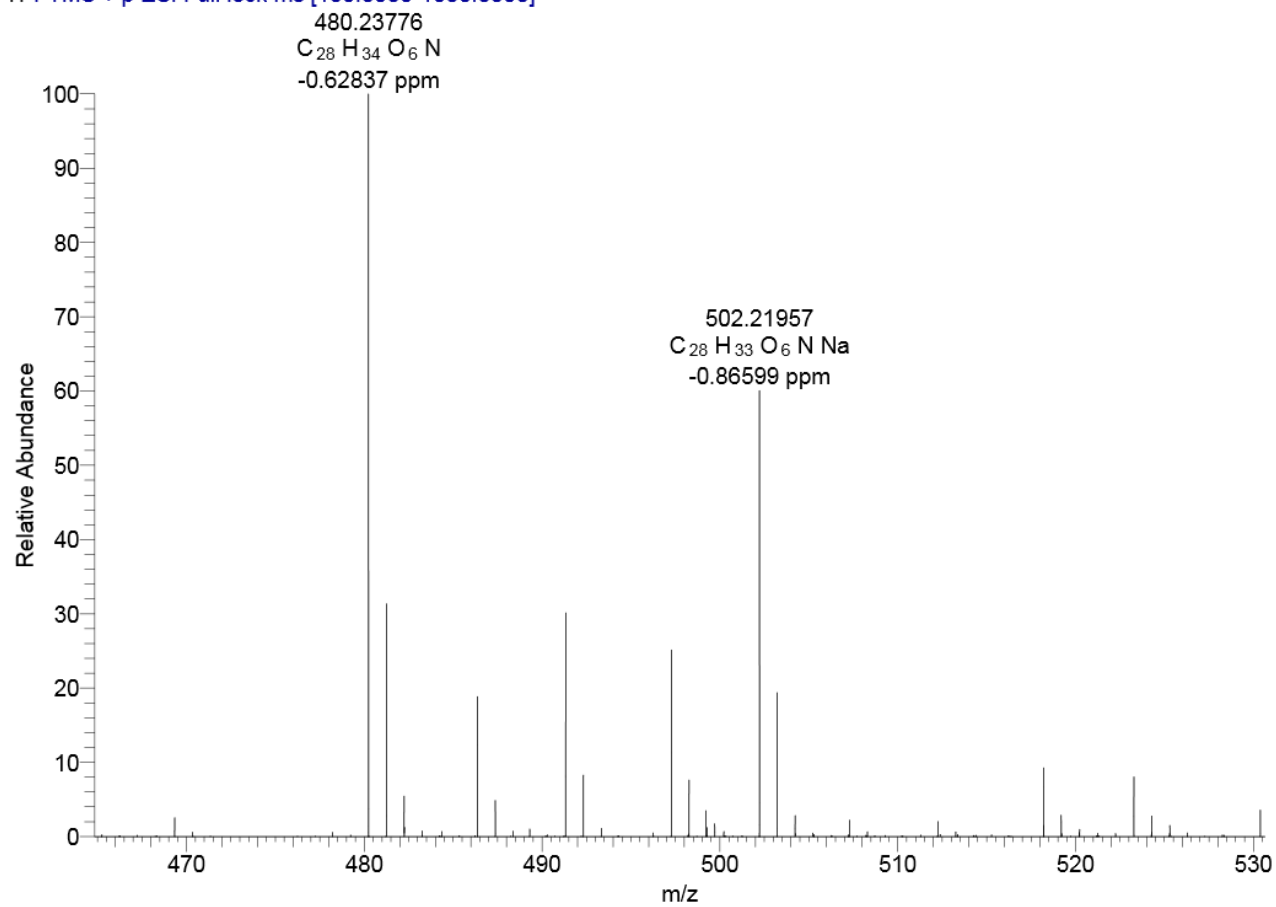

Fig. S90. HRESIMS of 9.



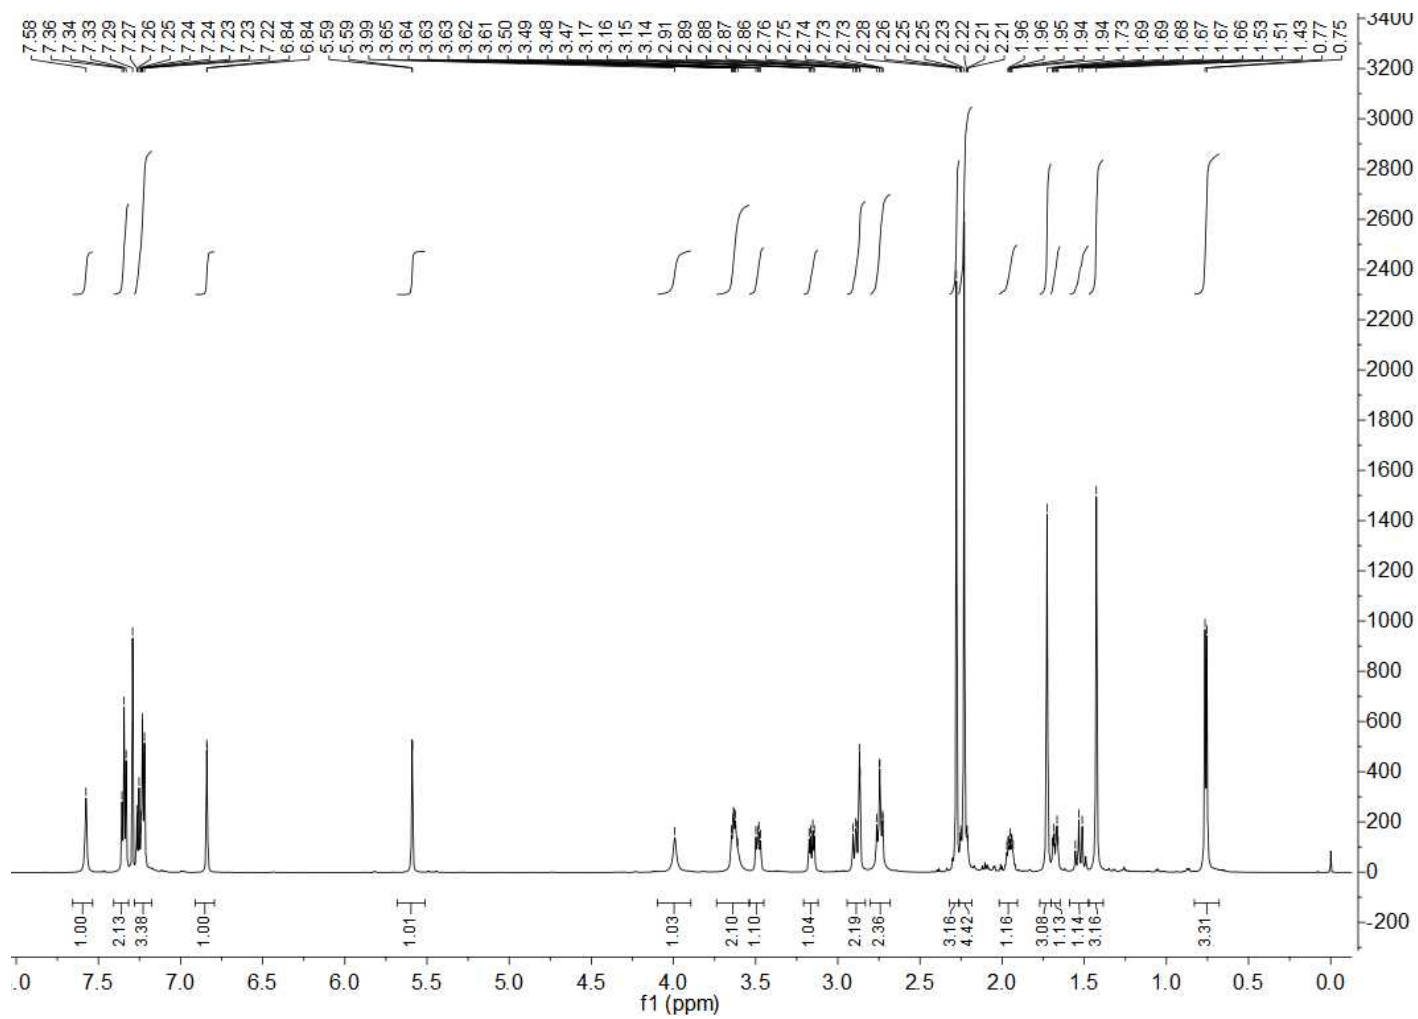

**Fig. S91.**  $^1\text{H}$  NMR of **10** ( $\text{CDCl}_3$ , 600 MHz).

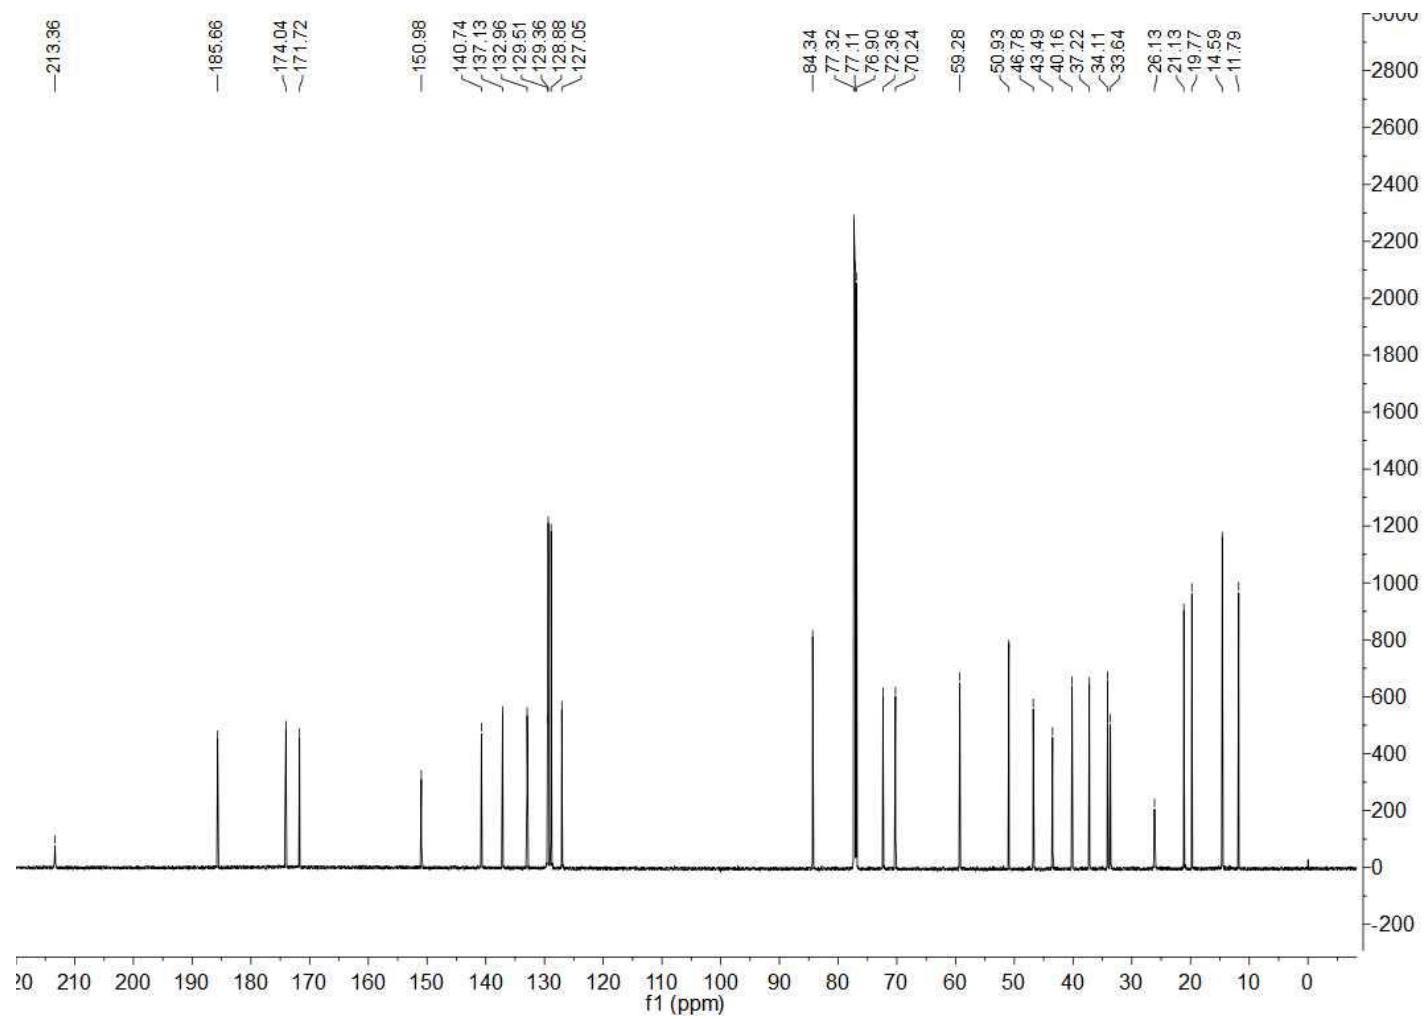

Fig. S92.  $^{13}\text{C}$  NMR of **10** ( $\text{CDCl}_3$ , 150 MHz).

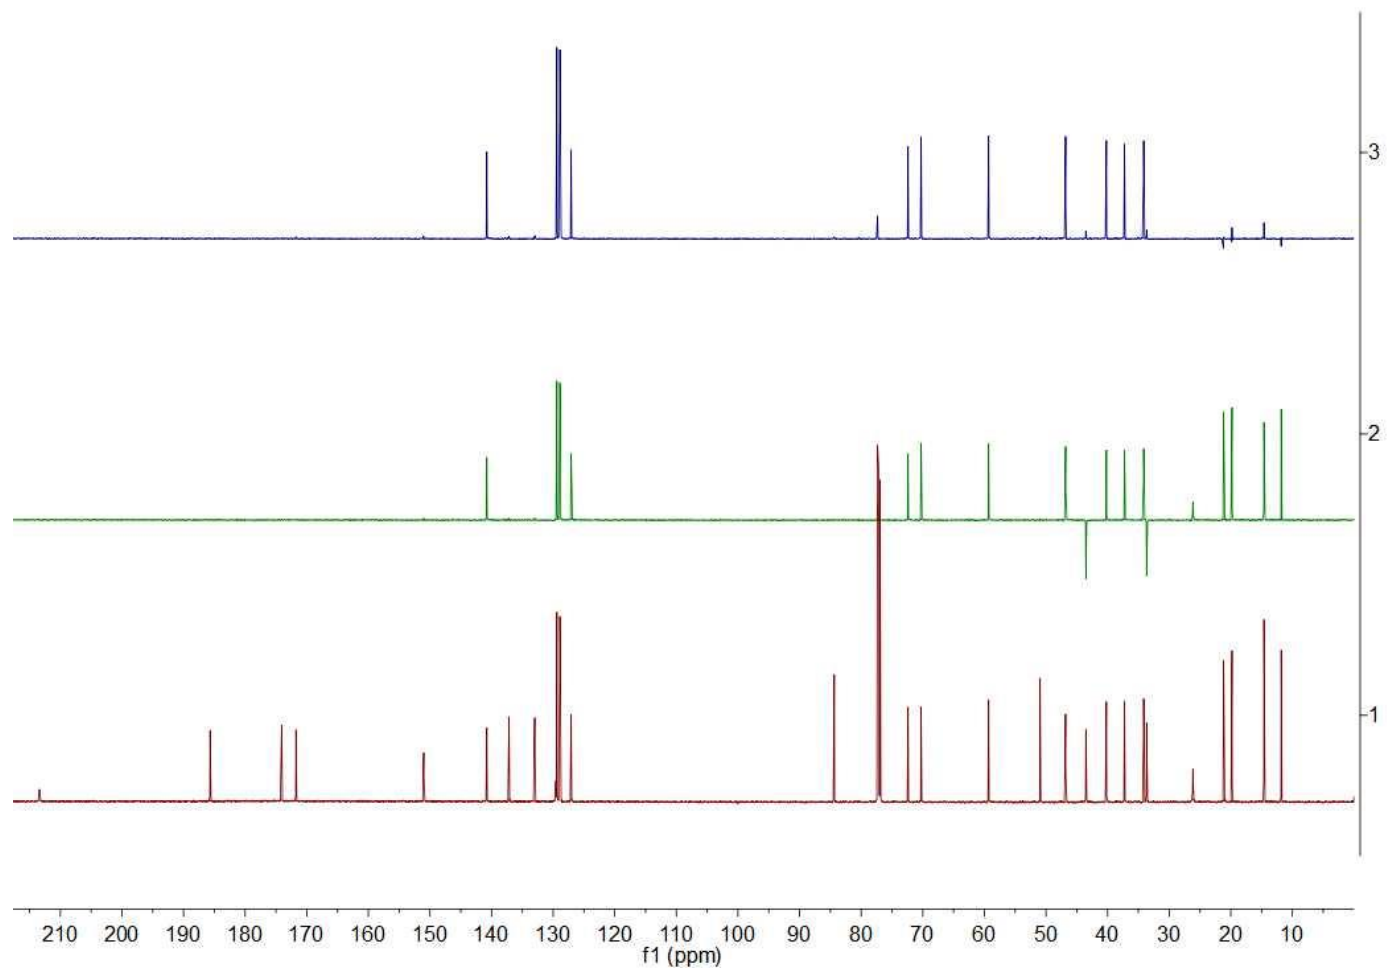

**Fig. S93.** DEPT of **10**.

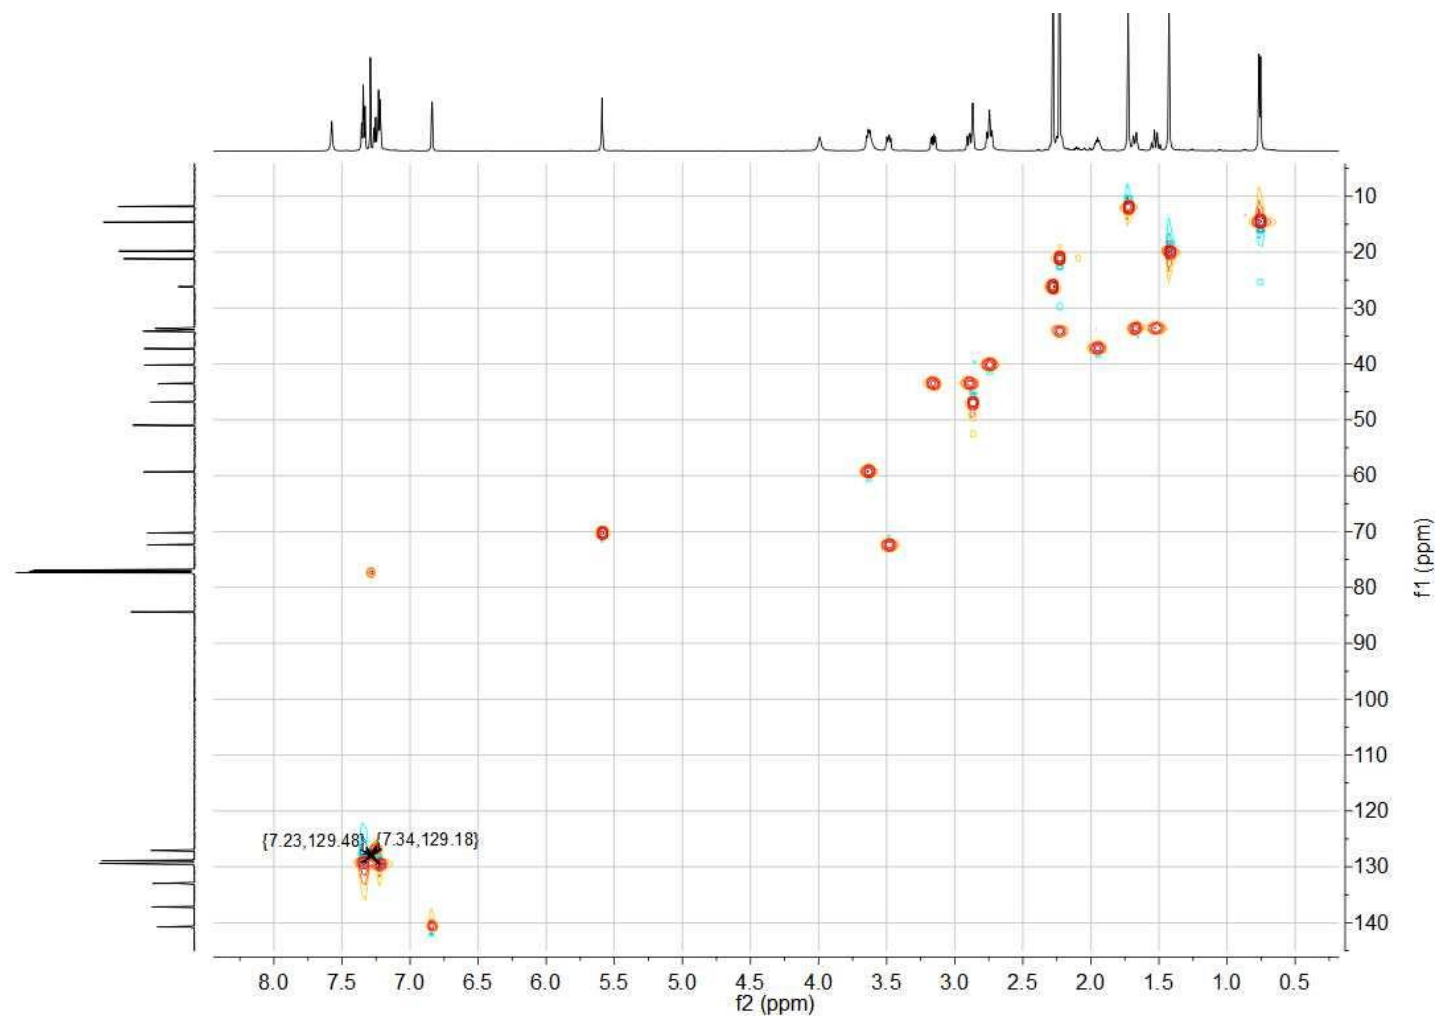

Fig. S94. HSQC of 10.

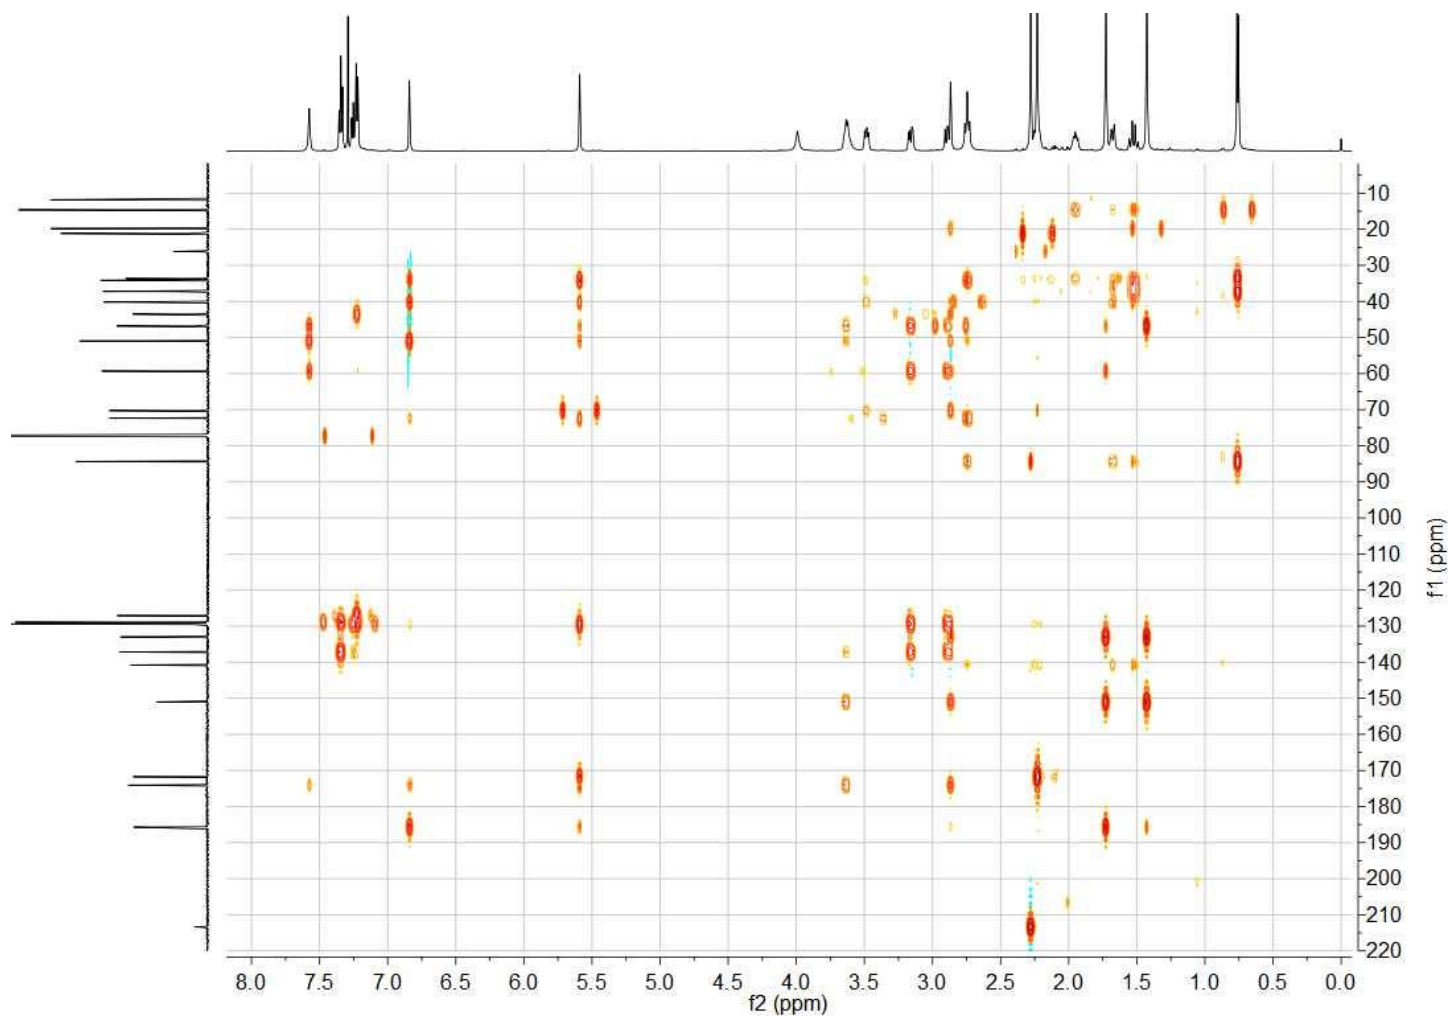

Fig. S95. HMBC of 10.



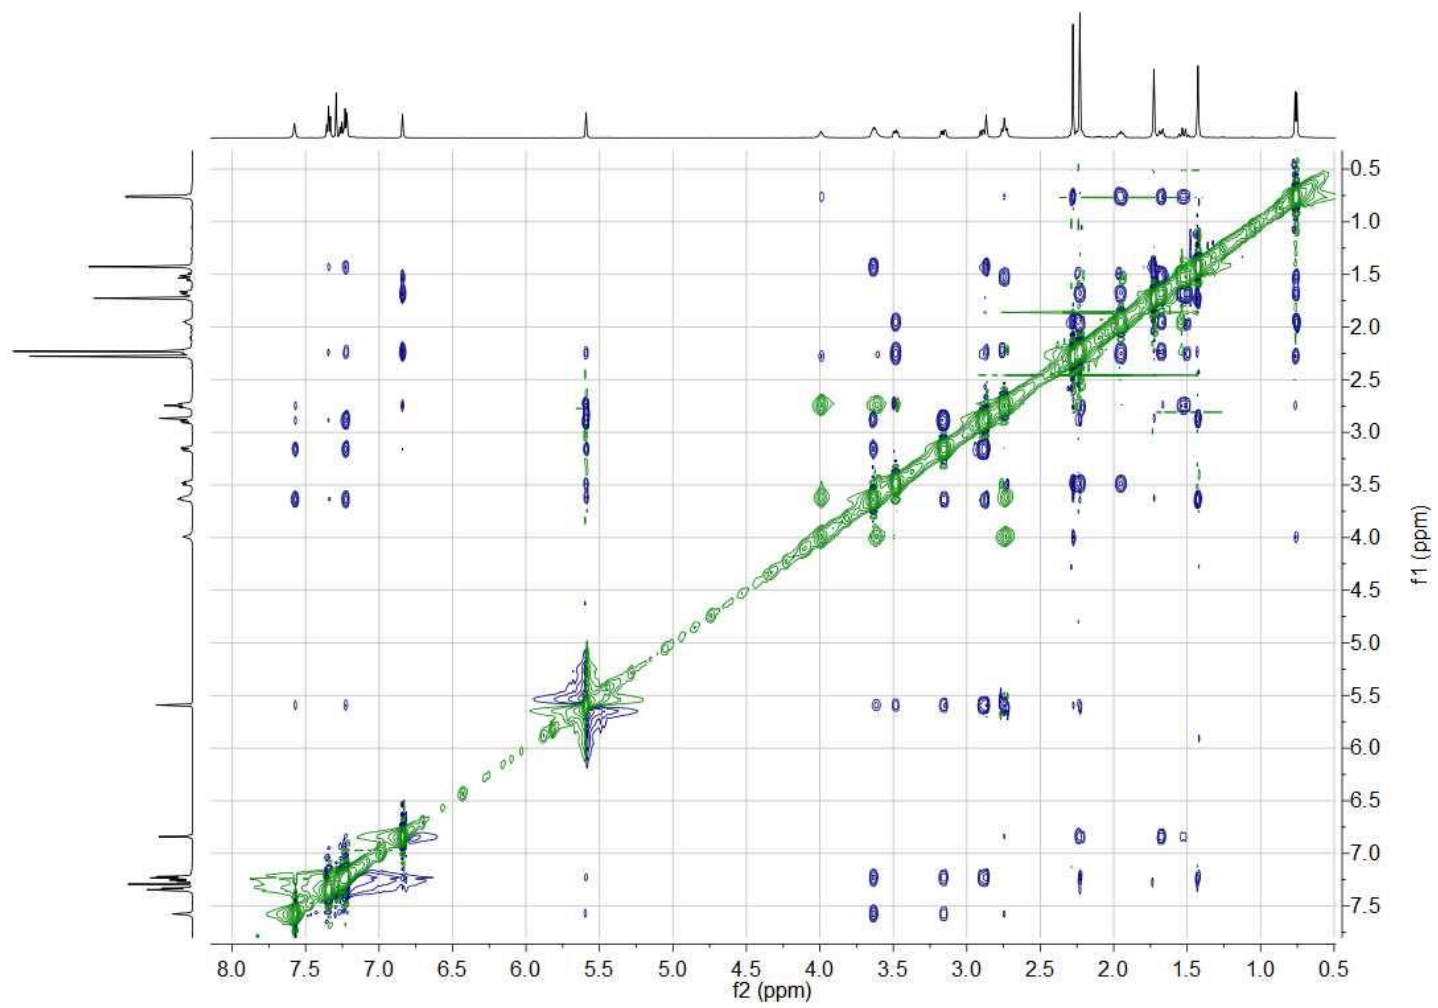

Fig. S97. ROESY of 10.

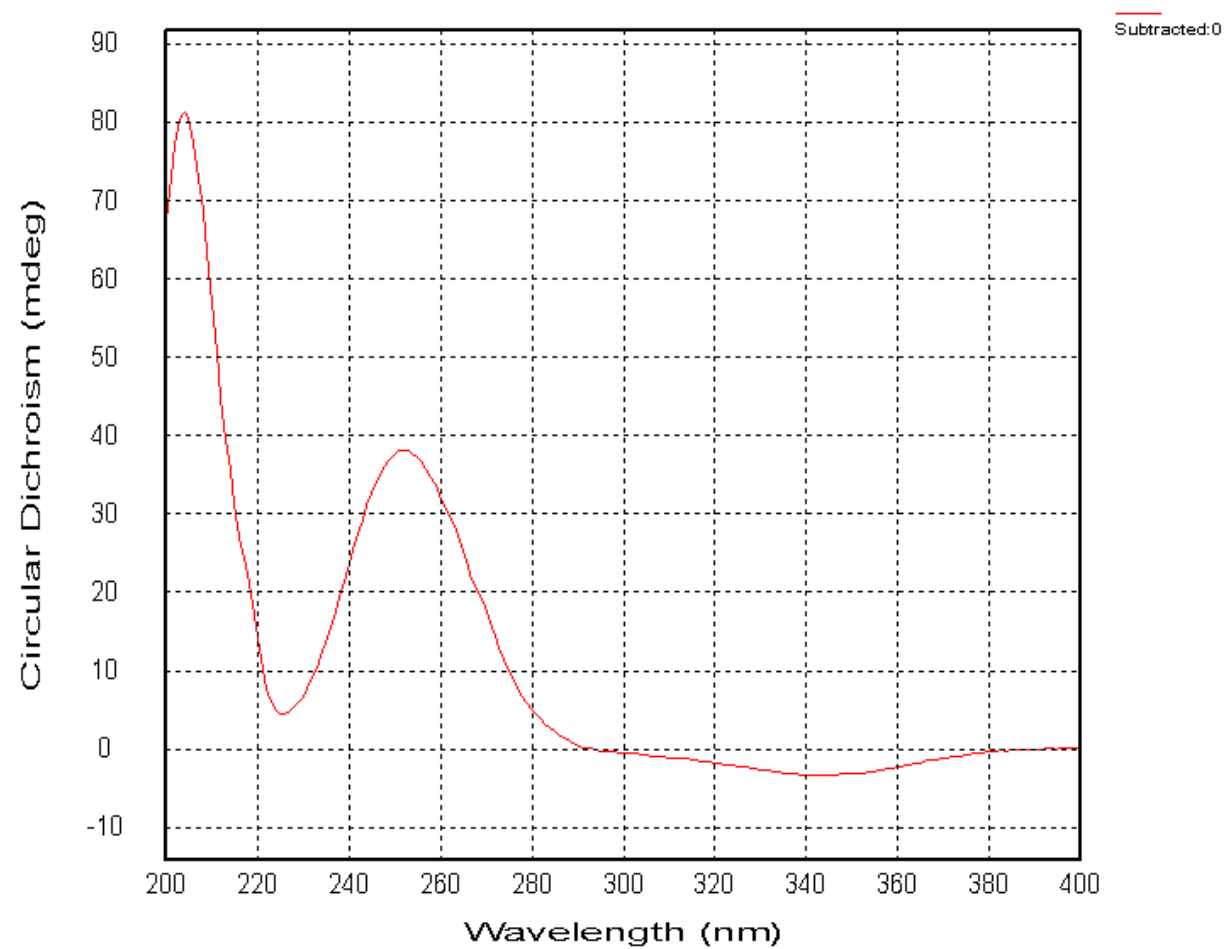

**Fig. S98.** Experimental ECD of **10**.



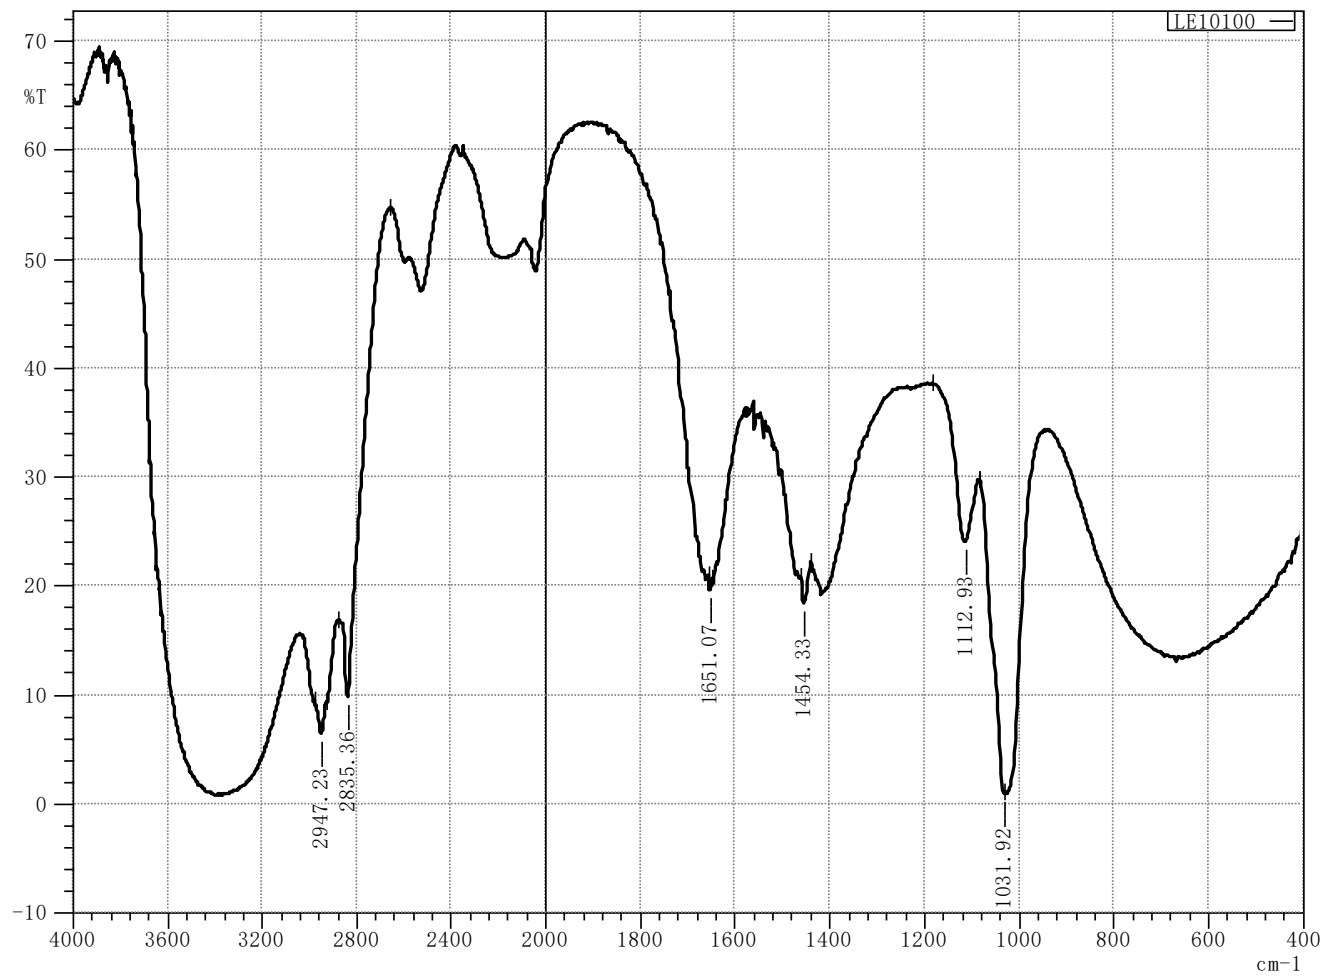

Fig. S99. IR of 10.

LE10100 #1654 RT: 14.42 AV: 1 NL: 1.79E8  
T: FTMS + p ESI Full lock ms [100.0000-1000.0000]

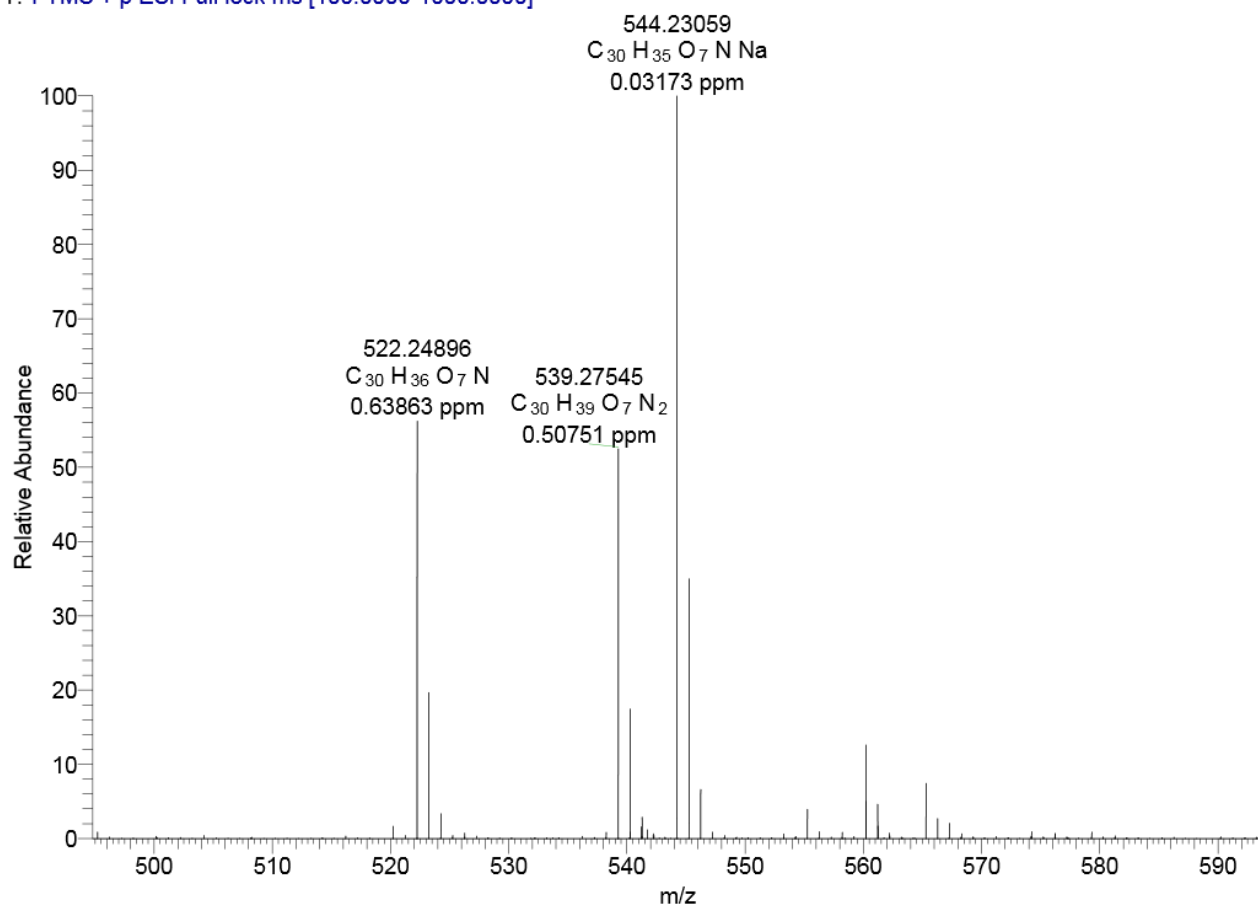

Fig. S100. HRESIMS of 10.

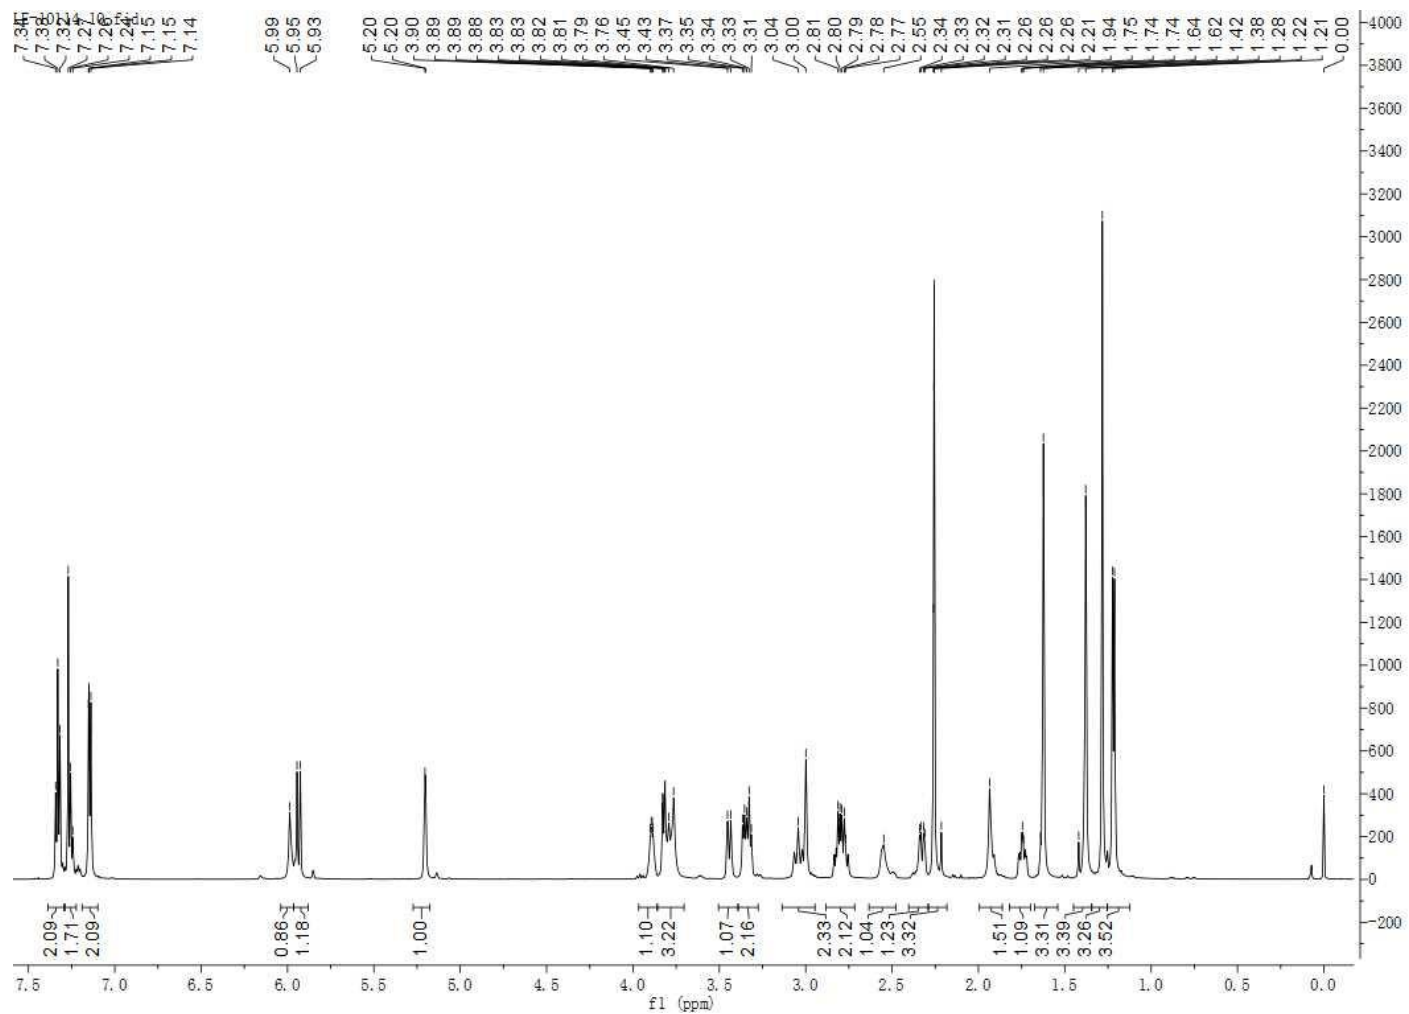

**Fig. S101.**  $^1\text{H}$  NMR of **11** ( $\text{CDCl}_3$ , 600 MHz).

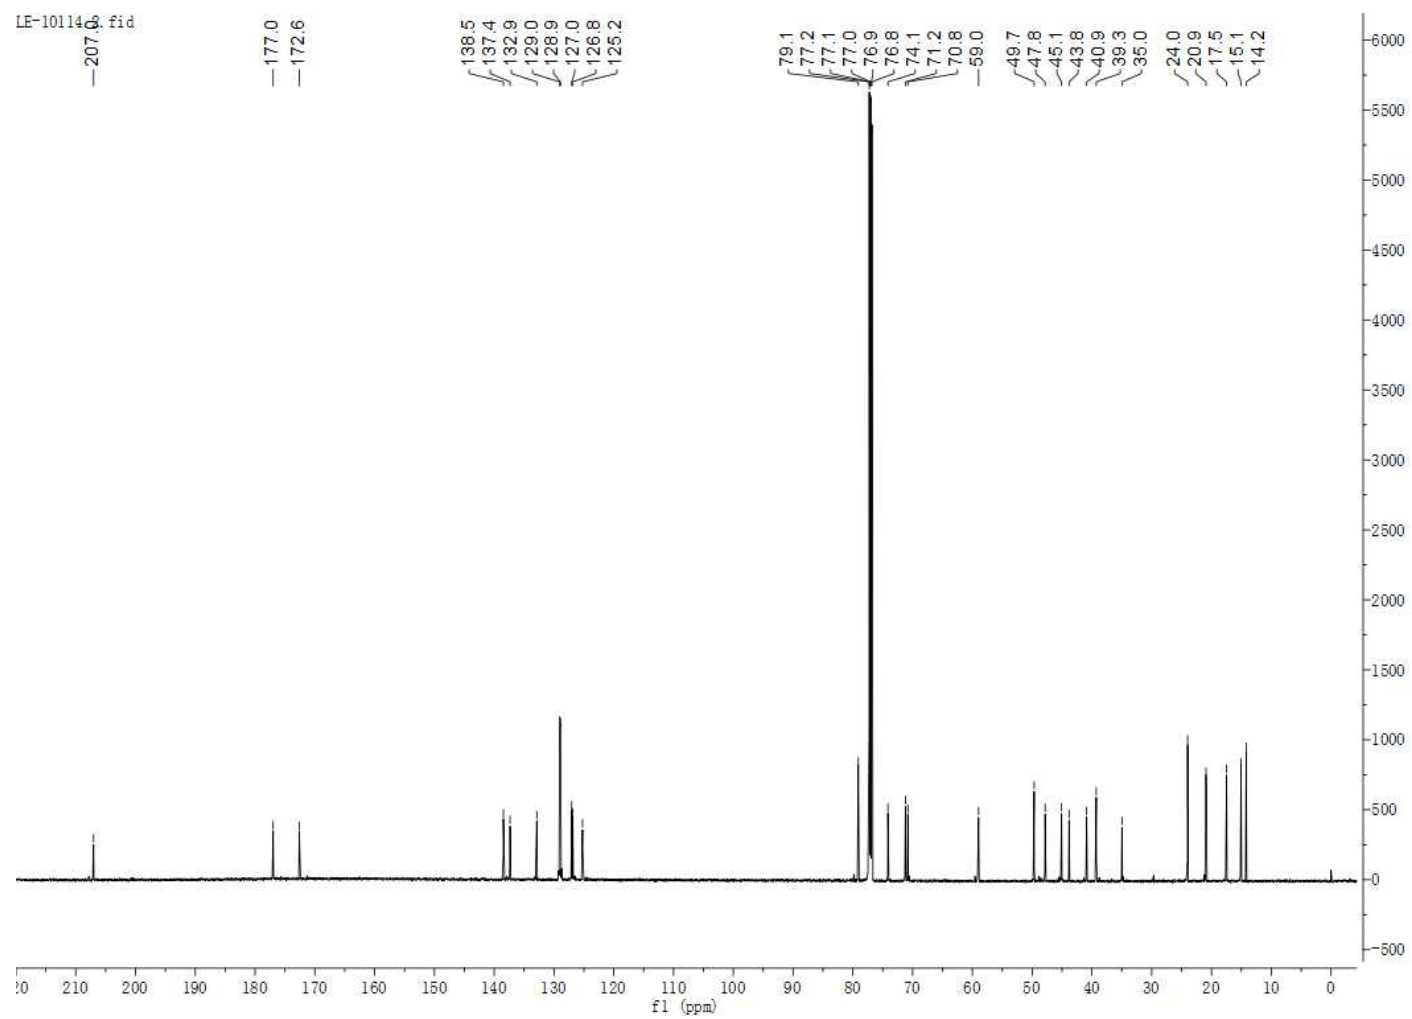

**Fig. S102.**  $^{13}\text{C}$  NMR of **11** ( $\text{CDCl}_3$ , 150 MHz).

LE-10114.4.fid

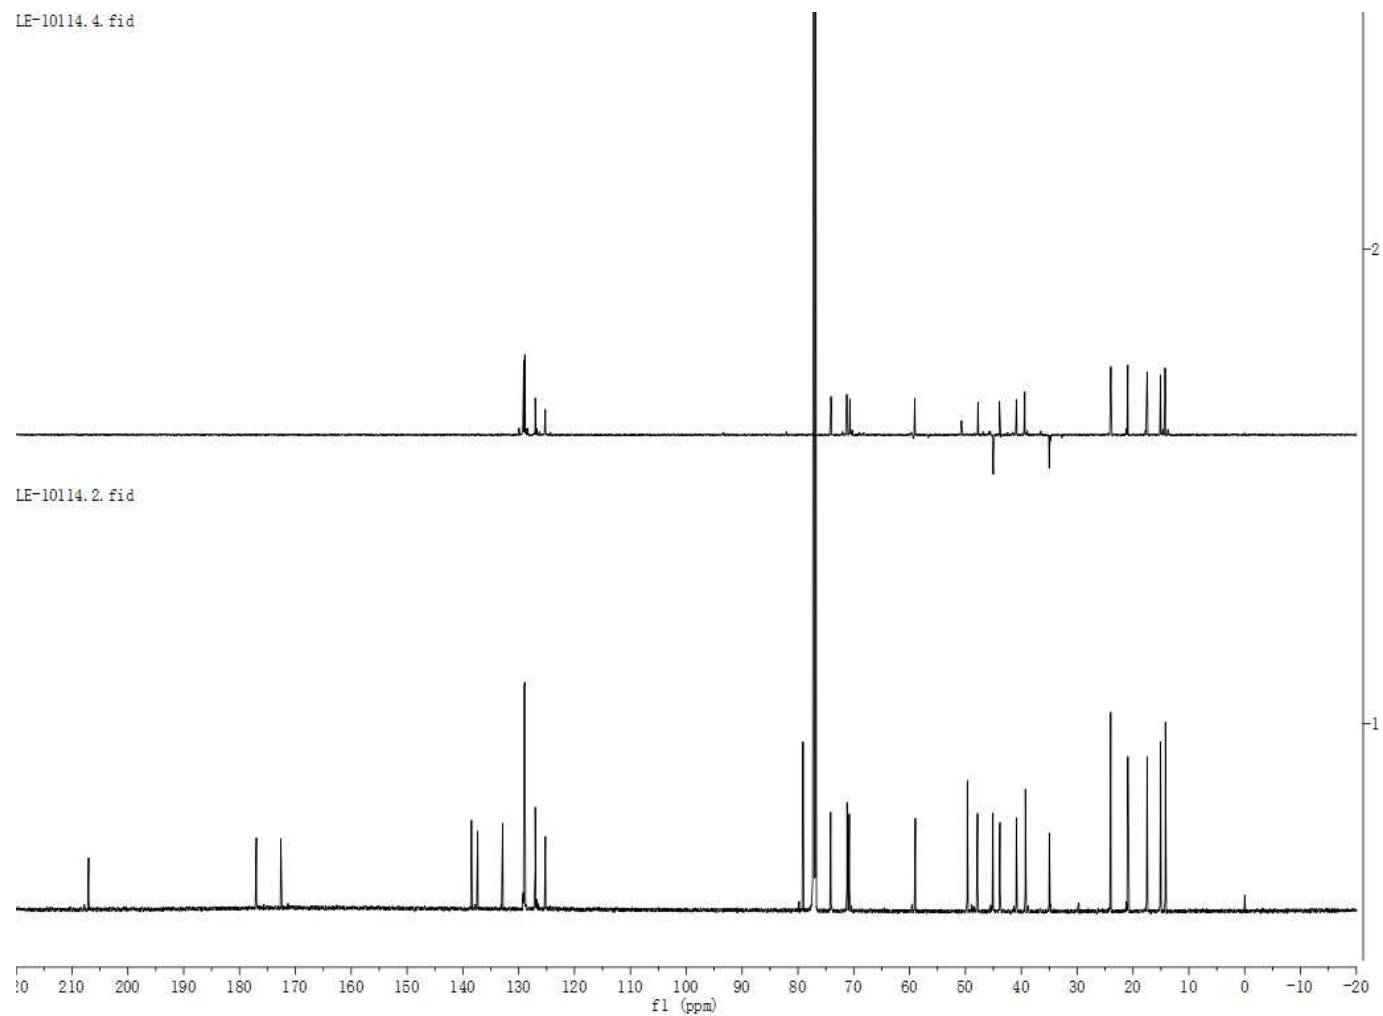

Fig. S103. DEPT of 11.

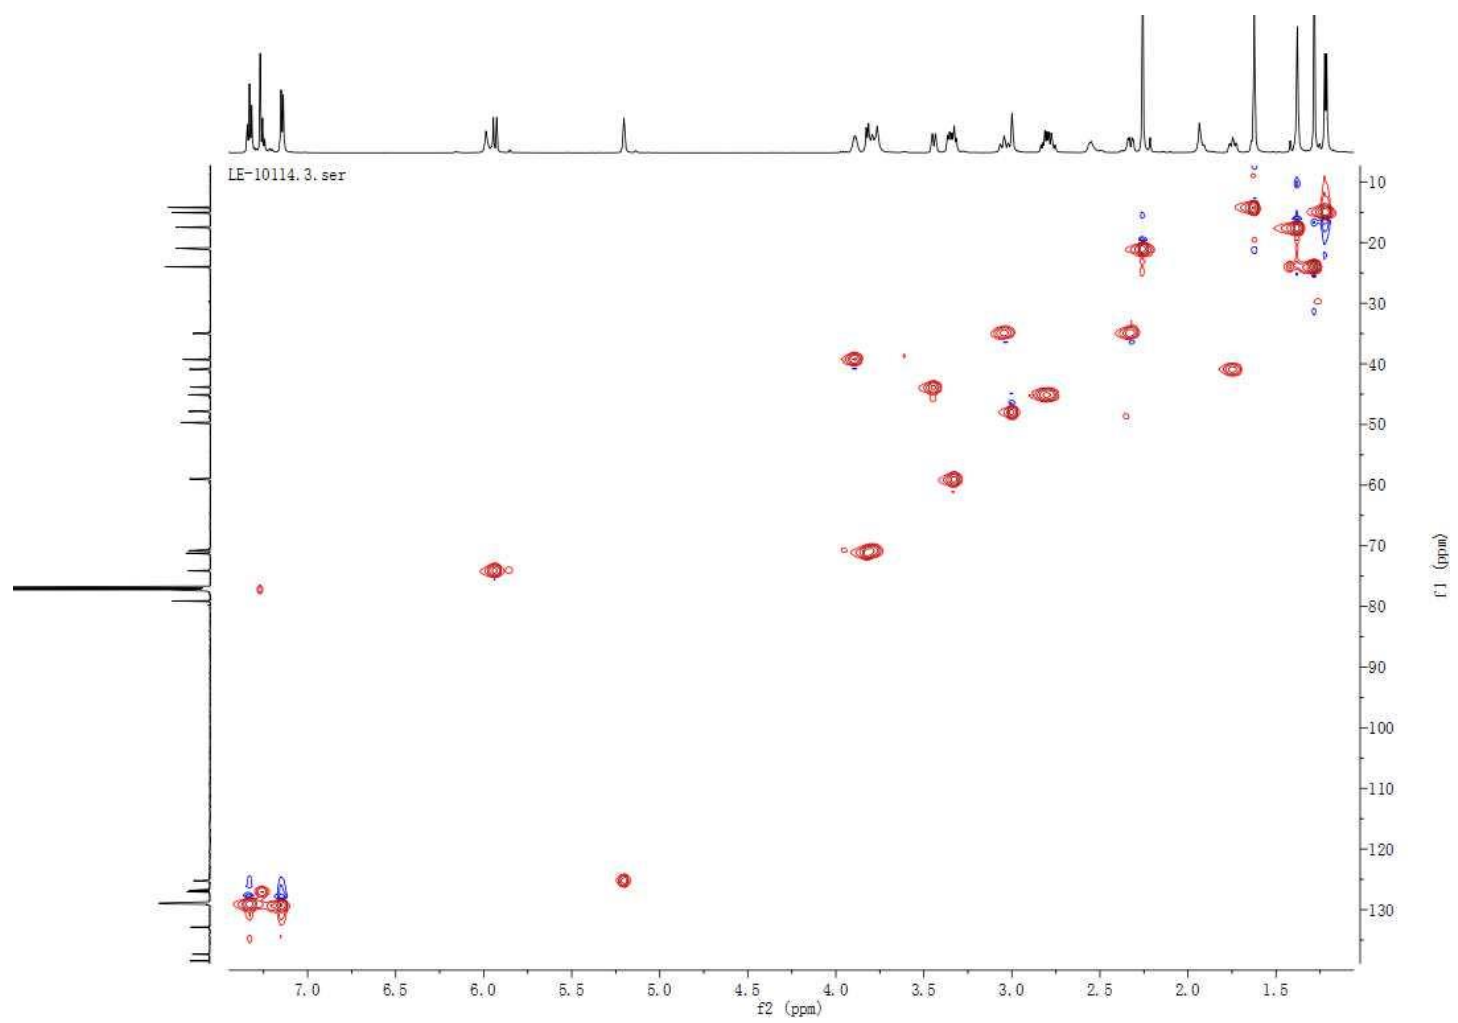

Fig. S104. HSQC of 11.

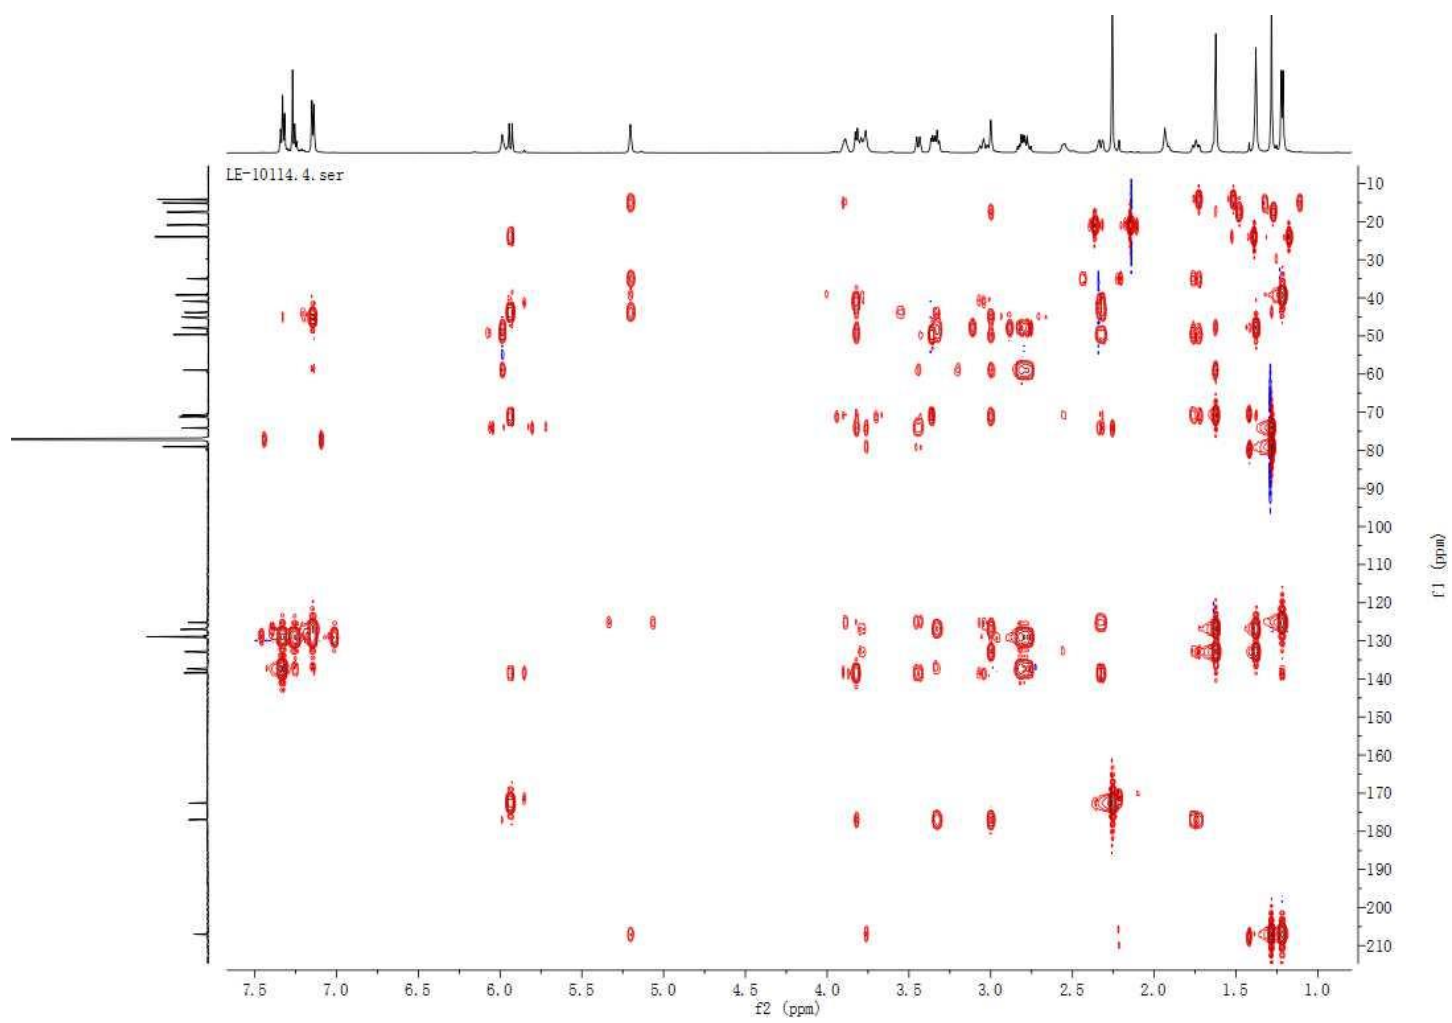

Fig. S105. HMBC of 11.

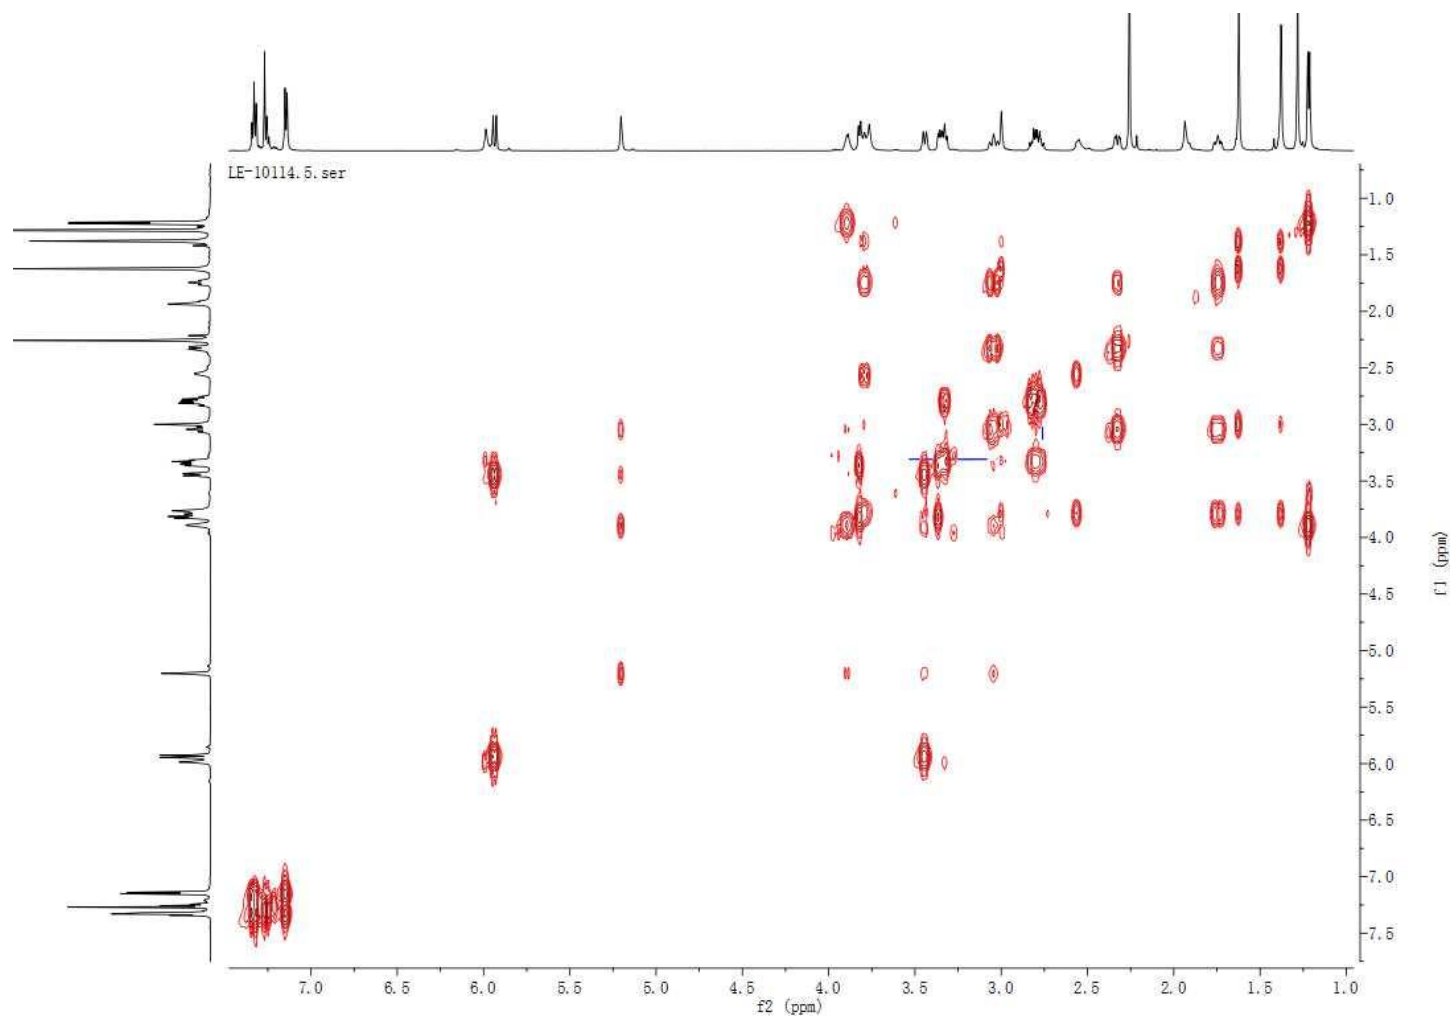

Fig. S106.  $^1\text{H}$ - $^1\text{H}$  COSY of **11**.



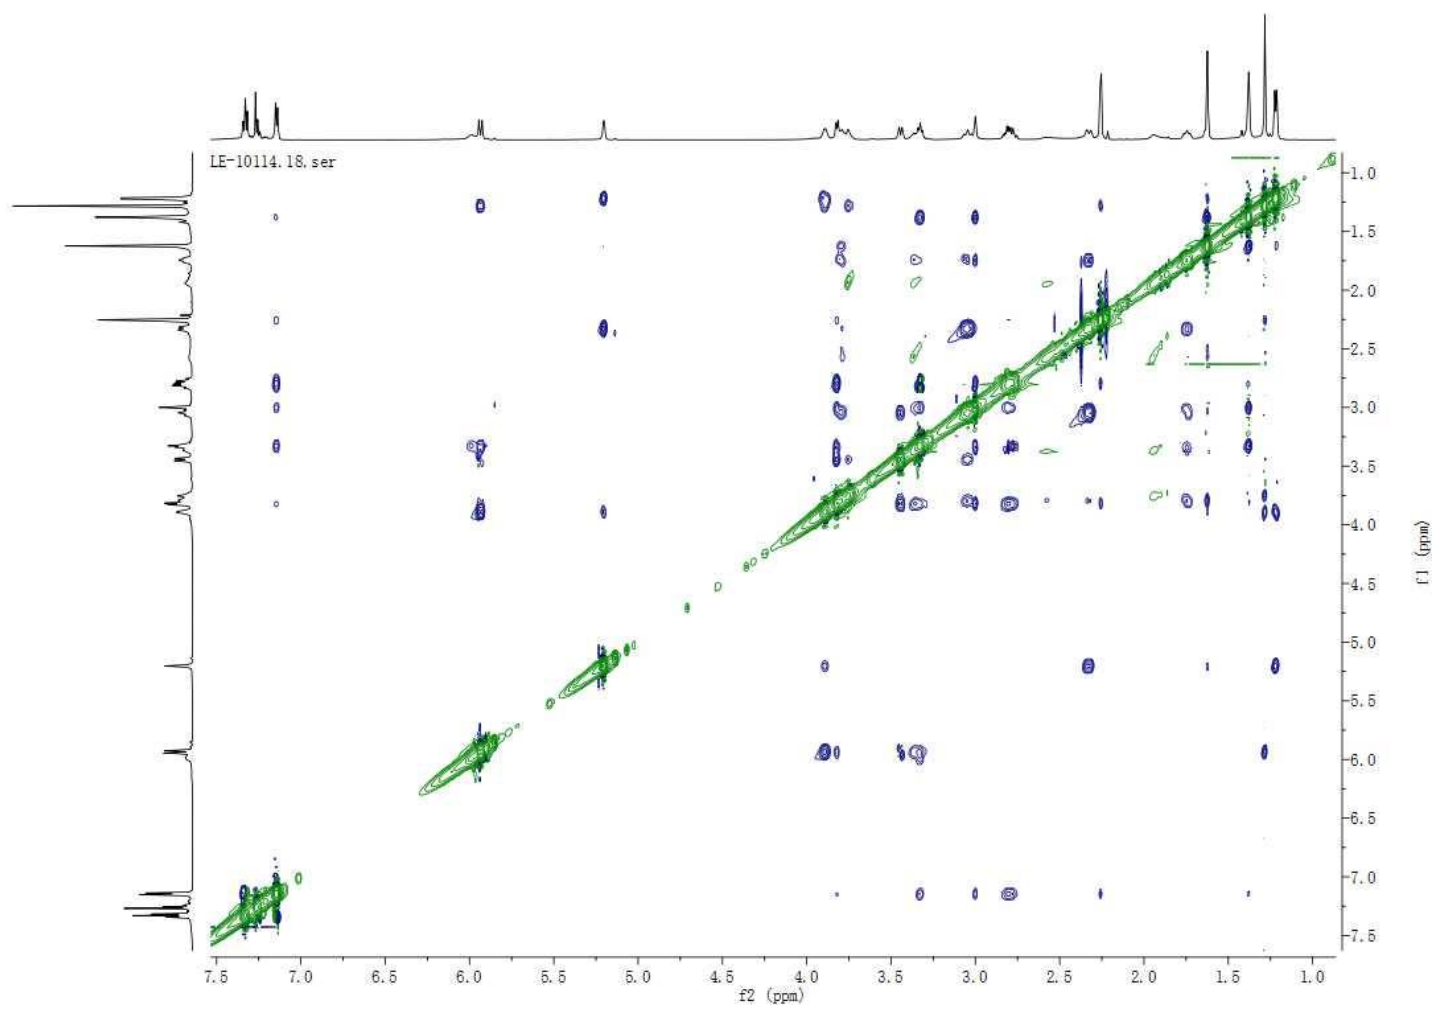

Fig. S107. ROESY of 11.

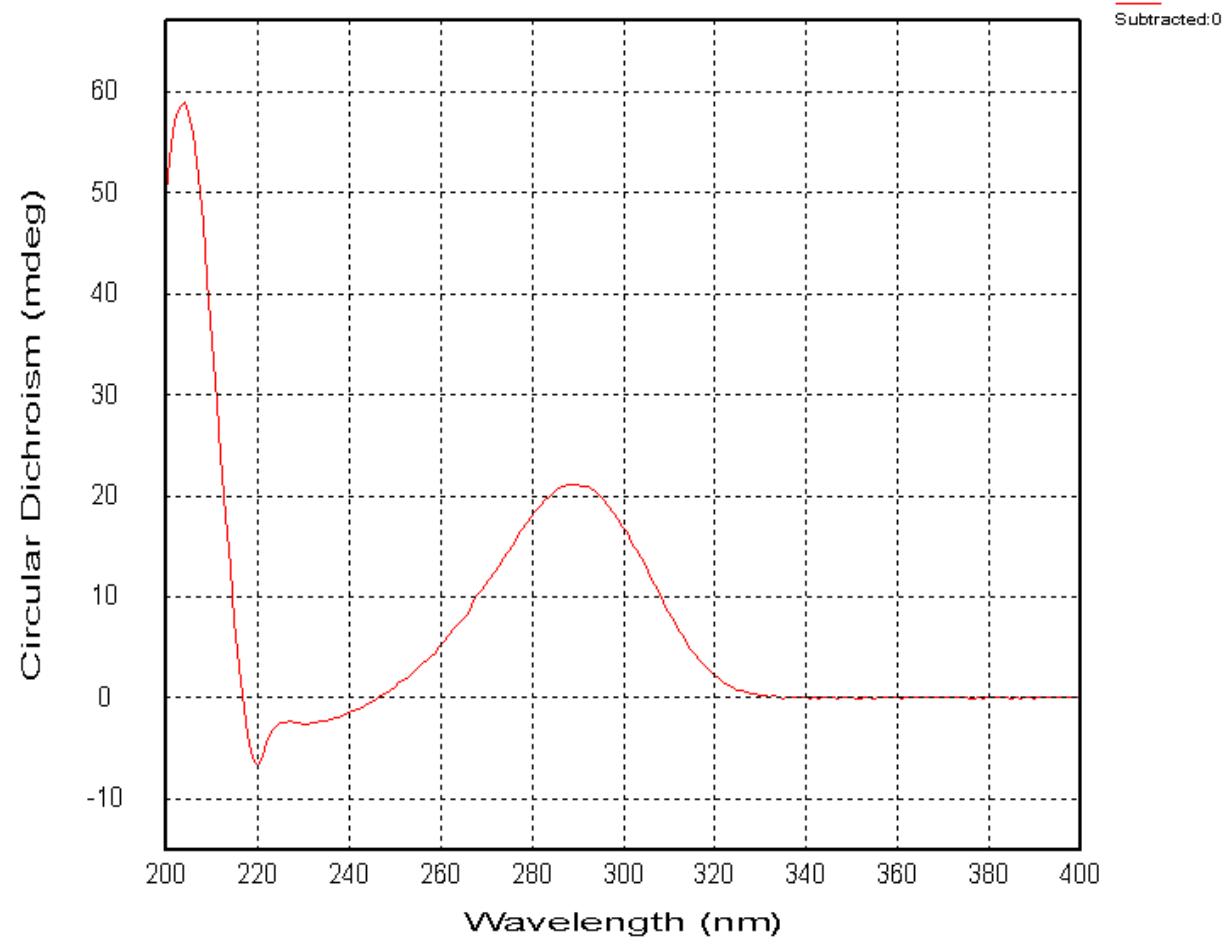

**Fig. S108.** Experimental ECD of **11**.

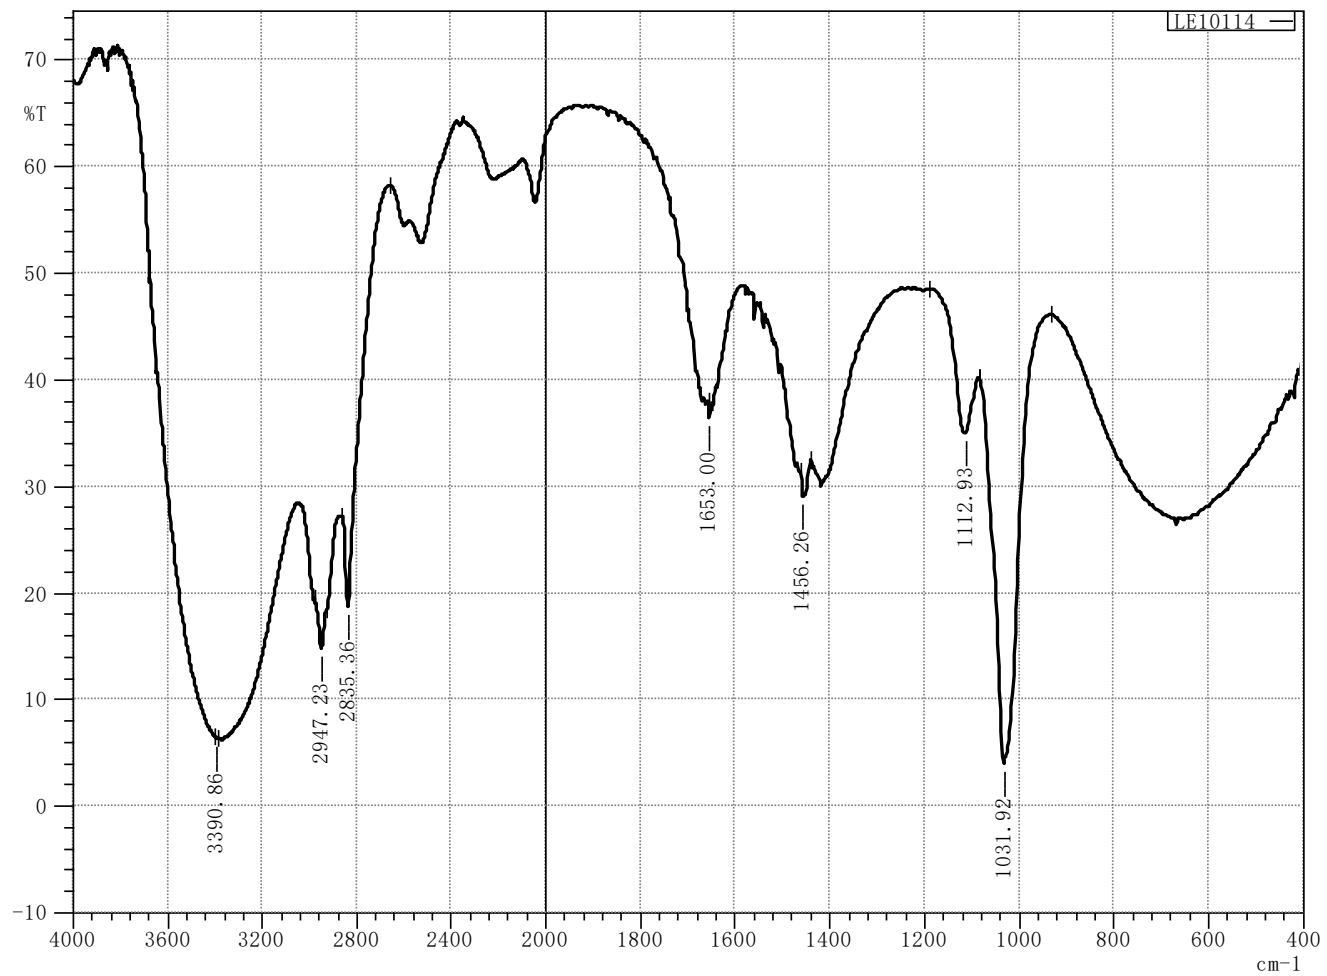

Fig. S109. IR of 11.

D:\Wen-Xuan\2019\E106R\20190322\LE10114

03/22/19 11:14:03

LE10114 #1645 RT: 14.35 AV: 1 NL: 2.08E9  
T: FTMS + p ESI Full ms [250.0000-2000.0000]

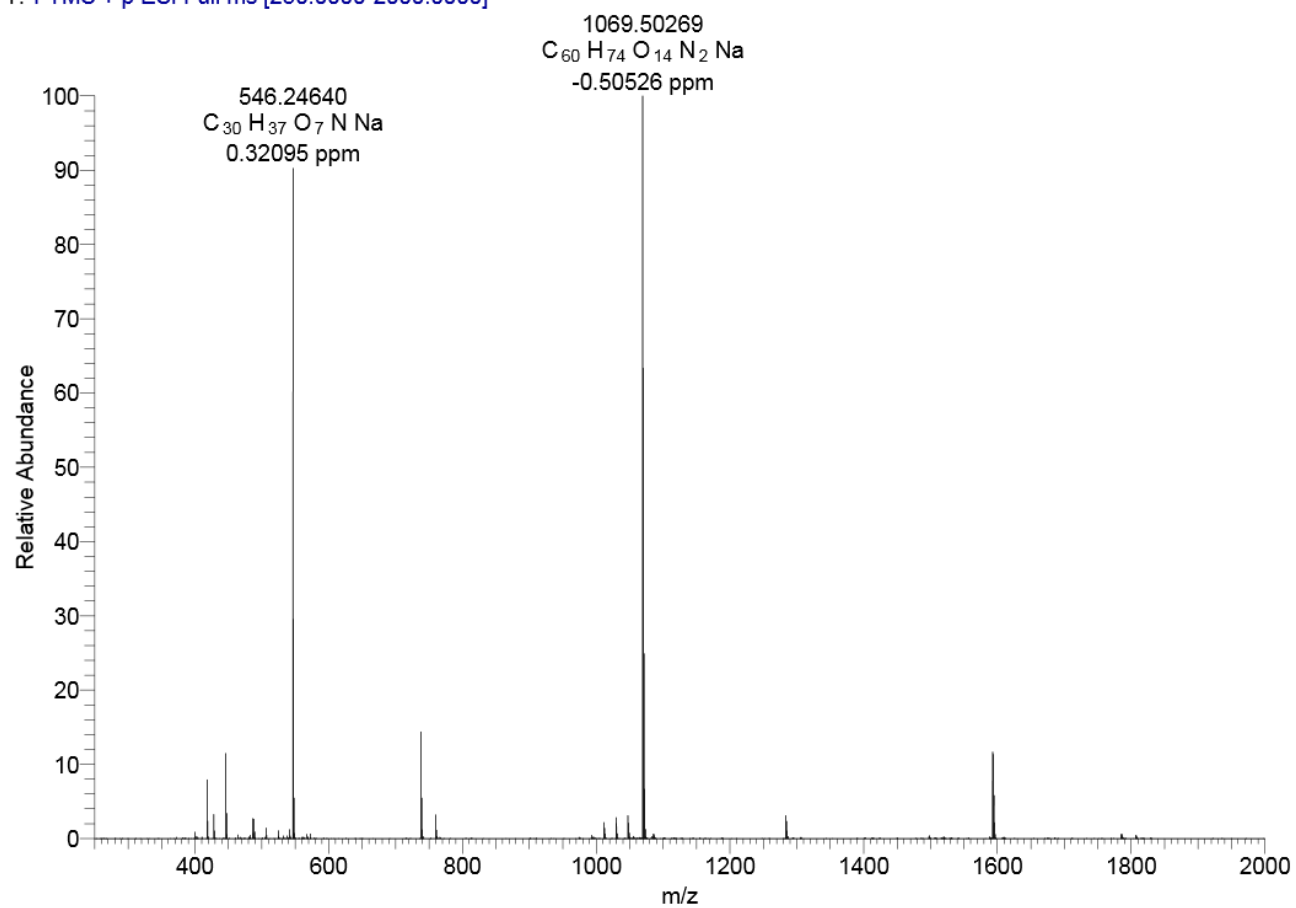

Fig. S110. HRESIMS of 11.
